# Supplementary material for: Direct transformation of coumarins into orange-red emitting rhodols
Source: Royal Society of Chemistry journal article supplement (doi:10.1039/d1cc06924a), 2022-01-01
Supplement: d1cc06924a1.pdf [file d1cc06924a1.pdf]

Supporting information

# Direct transformation of coumarins into orange-red emitting rhodols

Kateryna V. Vygranenko,<sup>a</sup> Yevgen M. Poronik,<sup>a</sup> Manon H. E. Bousquet,<sup>b</sup> Olena Vakuliuk,<sup>a</sup> Denis Jacquemin<sup>\*b</sup> and Daniel T. Gryko<sup>\*a</sup>

- a. *Institute of Organic Chemistry, Polish Academy of Sciences, Kasprzaka 44/52, 01-224 Warsaw, Poland. E-mail: dtgryko@icho.edu.pl.*
- b. *CEISAM Lab—UMR 6230, CNRS, University of Nantes, Nantes, France. E-mail : Denis.Jacquemin@univ-nantes.fr*

## Table of Contents

|                                                                    |     |
|--------------------------------------------------------------------|-----|
| Instrumentation and Materials .....                                | S1  |
| Optimization of reaction conditions for the rhodol synthesis ..... | S2  |
| Experimental Part.....                                             | S5  |
| <sup>1</sup> H and <sup>13</sup> C NMR Spectra .....               | S20 |
| X-Ray data for compounds <b>12</b> and <b>13</b> .....             | S48 |
| Absorption and emission spectra of compounds <b>4-13</b> .....     | S71 |
| Photostability measurements .....                                  | S74 |
| Theoretical methods .....                                          | S76 |
| Notes and references .....                                         | S79 |

## Instrumentation and Materials

All chemicals were used as received unless otherwise noted. All reported <sup>1</sup>H and <sup>13</sup>C NMR spectra were collected using 500 MHz and 600 MHz spectrometers. Chemical shifts ( $\delta$  ppm) were determined with TMS as the internal reference; *J* values are given in Hz. Chromatography was performed on silicagel (230-400 mesh). Preparative thin layer chromatography (TLC) was carried out using Merck PLC Silica gel 60 F<sub>254</sub> 1 mm plates. The mass spectra were obtained via electron ionization (EI-MS) or electrospray ionization (ESI-MS). All photophysical studies have been performed with freshly-prepared air-equilibrated solutions at room temperature (298 K).

A Shimadzu UV-3600i Plus spectrophotometer and an Edinburgh Instruments Spectrofluorometer FS5 equipped with Hamamatsu R13456 PMT were used to acquire the absorption and emission spectra. Spectrophotometric grade solvents were used without further purification. Fluorescence quantum yields were determined in CH<sub>2</sub>Cl<sub>2</sub> and DMSO using Rhodamine 6G in EtOH and sulforhodamine SR101 (for measurements of compounds **8-11** in DMSO) as standards. Photostability was determined using an Asahi Spectra Max-350 as a light source and Shimadzu UV-3600i Plus spectrophotometer.

### Optimization of reaction conditions for the rhodol synthesis

As a model reaction we chose the formation of rhodol **5** from coumarin aldehyde **S6** through intermediate **S20** (Scheme S2)

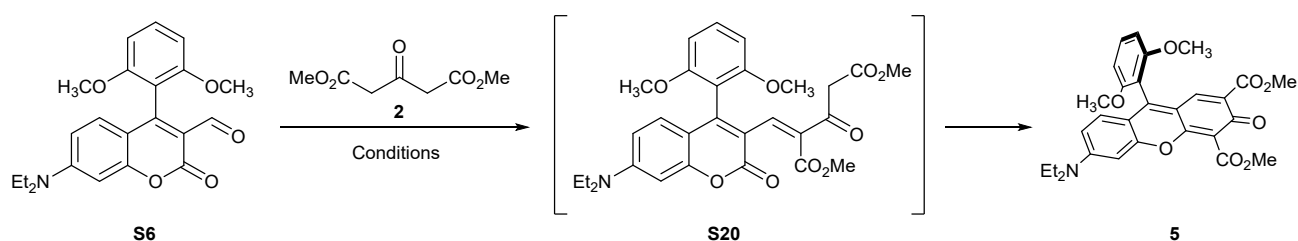

**Scheme S1.** The formation rhodol **5** from coumarin aldehyde **S6**.

Optical absorption measurement was chosen as a convenient instrumental method for the rhodol formation. The samples of coumarin aldehyde substrate were weighed with a 10<sup>-2</sup> mg precision, that allows keeping the concentration of the substrate within the same range for all optimization experiments. First we determined molar absorptivity ( $\epsilon$ ) of coumarin aldehyde substrate, the intermediate and the rhodol product (Fig. S1). The concentration ( $c$ ) of the substrate and the reaction product was calculated based on the Beer–Lambert law (Eq. 1), where  $A$  is absorbance and  $l$  is optical path length in cm:

$$A = \epsilon lc \quad (1)$$

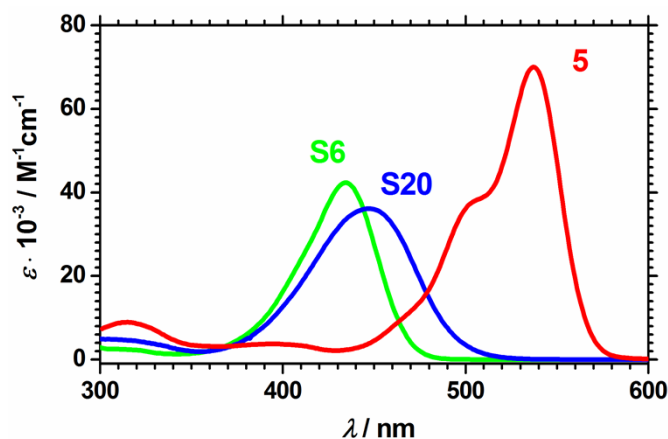

**Figure S1.** The absorption spectrum for **S6**, **S20** and **5** in  $\text{CH}_2\text{Cl}_2$ .

The standard procedure for all optimization experiments was chosen as follows:

Coumarin aldehyde (1mg) was dissolved in 1 mL of an appropriate solvent with a certain excess of **2** in the presence of basic catalyst at certain conditions. To check the concentration an 20  $\mu\text{L}$  aliquot was taken from the reaction mixture and diluted to 5 mL with  $\text{CH}_2\text{Cl}_2$ . The absorption at the maxima was taken into account to calculate the concentration and the reaction yield of rhodol. Before the experiment started the exact amount of coumarin substrate was determined. In course of the reaction the concentrations of coumarin substrate and rhodol were monitored at equal time periods specified for each experiments. A dependence of the reaction yield on time allowed us finding optimal conditions for this type of transformation (Fig. S2).

To eliminate misinterpretations in the analysis of experiments we consider both spectroscopic data and TLC as in a number of experiments side reaction occurred that distorted the absorption data. For instance, all experiments in acetic anhydride as a solvent led to a formation of side products that has absorption in the same range as rhodol **5**, though rhodol formed very fast. We observed the similar situation for tests performed in pyridine or quinoline. The reactions were not efficient, besides that side products formed.

Studying model reaction in methanol in the presence of 1 eq. of piperidine we found that the use of 10eq. of dimethylacetondicarboxylate **2** leads to efficient conversion towards rhodol **5** with a minimum of side reactions, though due to the presence of little amount of side products having absorption at the spectral range of rhodol the reaction yield was overestimated (Fig. S2).

Using this method we have studied other rhodol formation to find the standard synthetic procedure. The chosen examples of the dependencies are shown in Fig. S2.

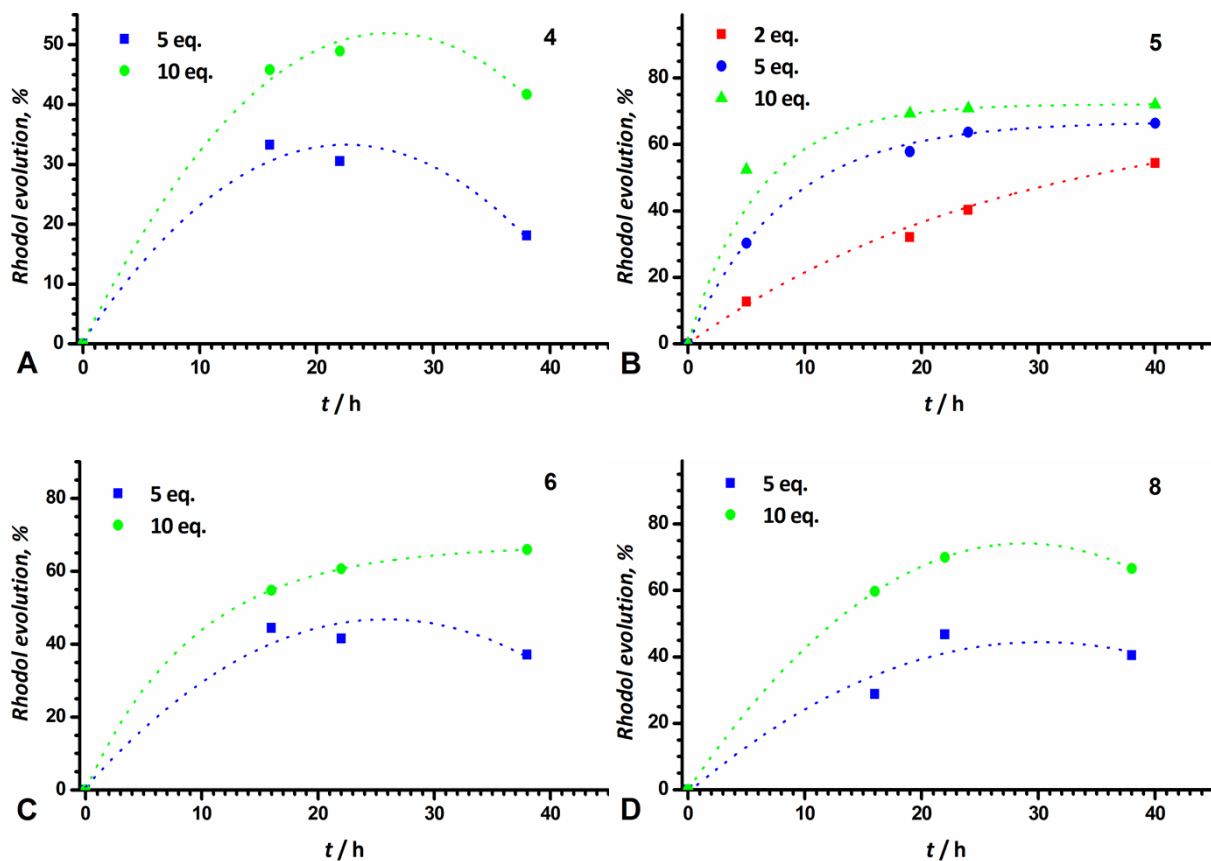

**Figure S2.** The optimization for the rhodols synthesis (A: Rhodol 4; B: Rhodol 5; C: Rhodol 6; B: Rhodol 8.). The rhodol evolution at using different excess of **2** based on the absorption at the correspondent absorption maxima. The intensity of rhodol signal is overestimated due to residual absorption of contaminants in this region.

## Experimental part

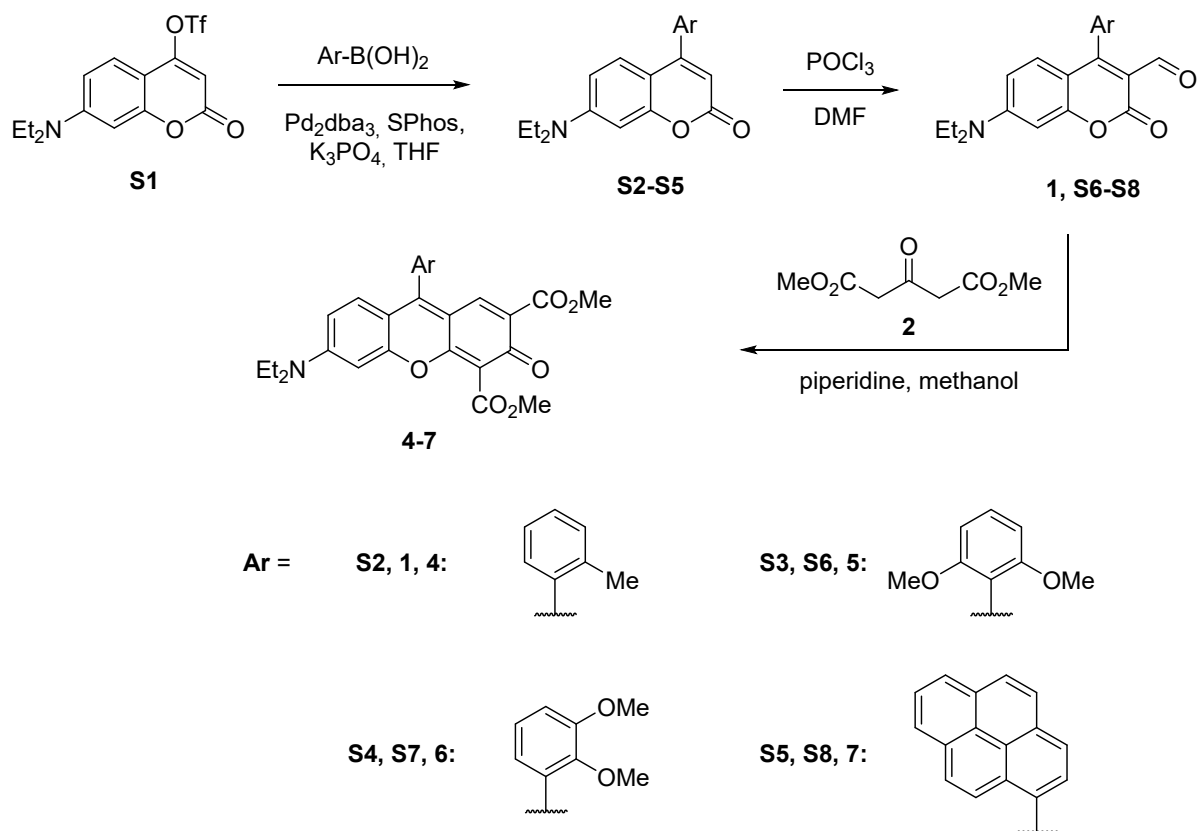

### Scheme S2. Synthetic route from coumarin **S1** to rhodols **4-7**.

General procedure for the preparation of compounds **S2-S5**.

Compound **S1** (10 mmol), arylboronic acid (15 mmol), bis(dibenzylideneacetone)-palladium(0) (0,25 mmol), 2-dicyclohexylphosphino-2',6'-dimethoxybiphenyl (SPhos) (0,75 mmol) and tribasic potassium phosphate (40 mmol) were placed under Ar in a flame-dried Schlenk flask. Dry and degassed THF (50 ml) was added and the reaction mixture was stirred at 70°C for 4h under inert atmosphere. After the reaction was complete the mixture was diluted with DCM, filtered through celite and washed with NaHCO<sub>3</sub> solution (3 × 150 ml). The organic layer was dried over Na<sub>2</sub>SO<sub>4</sub> and concentrated under vacuo. The residue was purified using column chromatography (hexane : EtOAc 1:1 + 1% AcOH).

Compound **S2**. Yield 97%. M.p. 95-96°C

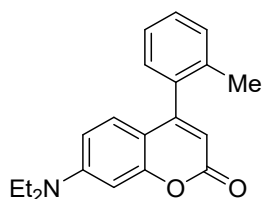

$^1\text{H}$  NMR (500 MHz,  $\text{CDCl}_3$ )  $\delta$  7.35 (m, 1H, H-Ar), 7.32 – 7.27 (m, 2H, H-Ar), 7.16 (dd,  $J = 7.5, 1.5$  Hz, 1H, H-Ar), 6.82 (d,  $J = 9.0$  Hz, 1H, H-Ar), 6.56 (d,  $J = 2.6$  Hz, 1H, H-Ar), 6.45 (dd,  $J = 9.0, 2.6$  Hz, 1H, H-Ar), 5.94 (s, 1H, C-H), 3.40 (q,  $J = 7.1$  Hz, 4H,  $\text{CH}_2$ ), 2.18 (s, 3H,  $\text{CH}_3$ -Ar), 1.20 (t,  $J = 7.1$  Hz, 6H,  $\text{CH}_3$ );  $^{13}\text{C}$  NMR (126 MHz,  $\text{CDCl}_3$ )  $\delta$  162.2, 156.4 (2), 150.7, 135.8, 135.3, 130.3, 128.7, 128.3, 127.8, 125.8, 108.8, 108.6, 108.5, 97.6, 44.7, 19.7, 12.4; HRMS (ESI) calc. for  $\text{C}_{20}\text{H}_{21}\text{NO}_2\text{Na}$  330.1470  $[\text{M} + \text{Na}]^+$ , found 330.1465.

Compound **S3**. Yield 76%. M.p. 136-138°C

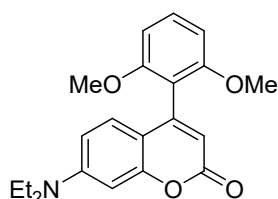

$^1\text{H}$  NMR (500 MHz,  $\text{CDCl}_3$ )  $\delta$  7.36 (t,  $J = 8.4$  Hz, 1H, H-Ar), 6.85 (d,  $J = 8.9$  Hz, 1H, H-Ar), 6.66 (d,  $J = 8.4$  Hz, 2H, H-Ar), 6.55 (d,  $J = 2.5$  Hz, 1H, H-Ar), 6.45 (d,  $J = 8.9$  Hz, 1H, H-Ar), 5.98 (s, 1H, C-H), 3.71 (s, 6H,  $\text{OCH}_3$ ), 3.39 (q,  $J = 7.1$  Hz, 4H,  $\text{CH}_2$ ), 1.19 (t,  $J = 7.1$  Hz, 6H,  $\text{CH}_3$ );  $^{13}\text{C}$  NMR (126 MHz,  $\text{CDCl}_3$ )  $\delta$  162.6, 157.6, 156.3, 150.4, 130.3, 127.4, 113.5, 111.0, 109.2, 108.3, 104.0, 99.7, 55.9, 44.8, 12.5; HRMS (ESI) calc. for  $\text{C}_{21}\text{H}_{23}\text{NO}_4\text{Na}$  376.1525  $[\text{M} + \text{Na}]^+$ , found 376.1535.

Compound **S4**. Yield 92%. M.p. 123-124°C

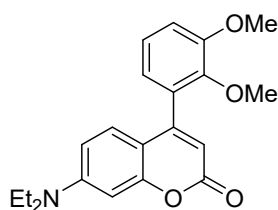

$^1\text{H}$  NMR (500 MHz,  $\text{CDCl}_3$ )  $\delta$  7.14 (t,  $J = 7.9$  Hz, 1H, Ar), 7.05 – 6.98 (m, 2H, Ar), 6.81 (dd,  $J = 7.6, 1.6$  Hz, 1H, Ar), 6.58 (d,  $J = 2.5$  Hz, 1H, Ar), 6.53 – 6.47 (m, 1H, Ar), 6.04 (s, 1H, C-H), 3.93 (s, 3H,  $\text{OCH}_3$ ), 3.67 (s, 3H,  $\text{OCH}_3$ ), 3.40 (q,  $J = 7.1$  Hz, 4H,  $\text{CH}_2$ ), 1.20 (t,  $J = 7.1$  Hz, 6H,  $\text{CH}_3$ );  $^{13}\text{C}$  NMR (126 MHz,  $\text{CDCl}_3$ )  $\delta$  162.2, 156.3, 153.7, 152.9, 150.6, 146.3, 130.6, 128.9, 124.2, 121.6, 113.1, 109.1, 108.5, 108.4, 97.4, 61.3, 55.9, 44.7, 12.4; HRMS (ESI) calc. for  $\text{C}_{21}\text{H}_{23}\text{NO}_4\text{Na}$  376.1525  $[\text{M} + \text{Na}]^+$ , found 376.1532.

Compound **S5**. Yield 86%. M.p. 130-131°C

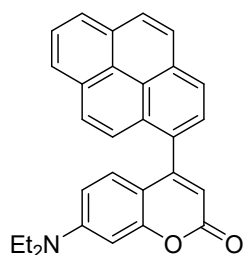

$^1\text{H}$  NMR (500 MHz,  $\text{CDCl}_3$ )  $\delta$  8.28 – 8.22 (m, 2H, Ar), 8.19 (dd,  $J = 7.6, 1.2$  Hz, 1H, Ar), 8.18 – 8.10 (m, 2H, Ar), 8.07 – 7.99 (m, 2H, Ar), 7.95 – 7.89 (m, 2H, Ar), 6.75 (d,  $J = 9.1$  Hz, 1H, Ar), 6.64 (d,  $J = 2.6$  Hz, 1H, Ar), 6.33 (dd,  $J = 9.1, 2.6$  Hz, 1H, Ar), 6.24 (s, 1H, C-H), 3.39 (q,  $J = 7.1$  Hz, 4H,  $\text{CH}_2$ ), 1.19 (t,  $J = 7.1$  Hz, 6H,  $\text{CH}_3$ );  $^{13}\text{C}$  NMR (126 MHz,  $\text{CDCl}_3$ )  $\delta$  162.1, 156.5, 155.9, 150.8, 131.7, 131.3, 130.8, 128.6, 128.5, 128.2, 127.2, 126.3 (2), 125.7, 125.5, 124.7, 124.6 (2), 110.4, 109.5, 108.6, 97.6, 44.8, 12.4; HRMS (ESI) calc. for  $\text{C}_{29}\text{H}_{23}\text{NO}_2\text{Na}$  440.1626  $[\text{M} + \text{Na}]^+$ , found 440.1613.

General procedure for the preparation of compounds **1**, **S6-S8**.

Phosphorus oxychloride (7,7 mmol) was added dropwise to a solution of 7-diethylamino-4-aryl-coumarin (**S2-S5**) (5 mmol) in DMF (15 ml) upon cooling on ice. The reaction mixture was allowed to stir at  $50^\circ\text{C}$  for 24h. The solution then was cooled to room temperature, poured into  $\text{NaHCO}_3$  aqueous solution (20 g in 100 ml  $\text{H}_2\text{O}$ ) with 300 ml of crashed ice. The precipitate which formed was filtered, washed with distilled water, dried under vacuum and purified via recrystallization from hexane + 2-propanol.

Compound **1**. Yield 60%. M.p.  $160\text{-}161^\circ\text{C}$

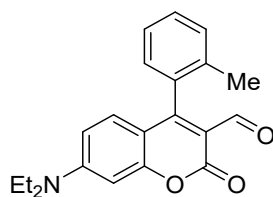

$^1\text{H}$  NMR (500 MHz,  $\text{CDCl}_3$ )  $\delta$  9.83 (s, 1H, CHO), 7.39 (td,  $J = 7.5, 1.4$  Hz, 1H, H-Ar), 7.35 – 7.26 (m, 2H, H-Ar), 7.06 (dd,  $J = 7.5, 1.4$  Hz, 1H, H-Ar), 6.80 (d,  $J = 9.2$  Hz, 1H, H-Ar), 6.52 (d,  $J = 2.6$  Hz, 1H, H-Ar), 6.48 (dd,  $J = 9.2, 2.6$  Hz, 1H, H-Ar), 3.45 (q,  $J = 7.1$  Hz, 4H,  $\text{CH}_2$ ), 2.10 (s,  $J = 2.4$  Hz, 3H,  $\text{CH}_3\text{-Ar}$ ), 1.23 (t,  $J = 7.1$  Hz, 6H,  $\text{CH}_3$ );  $^{13}\text{C}$  NMR (126 MHz,  $\text{CDCl}_3$ )  $\delta$  188.2, 162.0, 160.0, 157.8, 153.2, 135.1, 133.0, 130.5, 130.1, 128.9, 127.6, 125.8, 112.2, 109.8, 108.7, 97.0, 45.1, 19.4, 12.4; HRMS (ESI) calc. for  $\text{C}_{21}\text{H}_{21}\text{NO}_3\text{Na}$  358.1419  $[\text{M} + \text{Na}]^+$ , found 358.1415.

Compound **S6**. Yield 50%. M.p.  $213\text{-}215^\circ\text{C}$

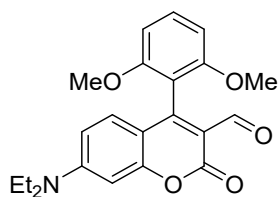

$^1\text{H}$  NMR (500 MHz,  $\text{CDCl}_3$ )  $\delta$  9.81 (s, 1H, CHO), 7.41 (t,  $J = 8.4$  Hz, 1H, H-Ar), 6.92 (d,  $J = 9.1$  Hz, 1H, H-Ar), 6.67 (d,  $J = 8.4$  Hz, 2H, H-Ar), 6.52 – 6.44 (m, 2H, H-Ar), 3.69 (s, 6H,  $\text{OCH}_3$ ), 3.43 (q,  $J = 7.1$  Hz, 4H,  $\text{CH}_2$ ), 1.22 (t,  $J = 7.1$  Hz, 6H,  $\text{CH}_3$ );  $^{13}\text{C}$  NMR (126 MHz,  $\text{CDCl}_3$ )  $\delta$  188.7, 160.2, 157.7, 157.4, 157.1, 152.9, 130.9, 129.9, 113.4, 110.3, 109.4, 109.0, 103.9, 96.9, 55.9, 45.0, 12.5; HRMS (ESI) calc. for  $\text{C}_{22}\text{H}_{23}\text{NO}_5\text{Na}$  404.1474  $[\text{M} + \text{Na}]^+$ , found 404.1486.

Compound **S7**. Yield 28%. M.p. 163-164°C

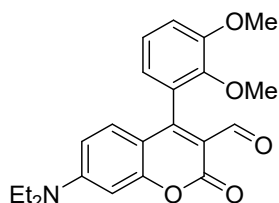

$^1\text{H}$  NMR (500 MHz,  $\text{CDCl}_3$ )  $\delta$  9.98 (s, 1H, CHO), 7.16 (t,  $J = 7.9$  Hz, 1H, H-Ar), 7.05 (d,  $J = 8.2$  Hz, 1H, H-Ar), 6.93 (d,  $J = 9.1$  Hz, 1H, H-Ar), 6.66 (d,  $J = 7.6$  Hz, 1H, H-Ar), 6.53 – 6.45 (m, 2H, H-Ar), 3.94 (s, 3H,  $\text{OCH}_3$ ), 3.67 (s, 3H,  $\text{OCH}_3$ ), 3.43 (q,  $J = 7.1$  Hz, 4H,  $\text{CH}_2$ ), 1.22 (t,  $J = 7.1$  Hz, 6H,  $\text{CH}_3$ );  $^{13}\text{C}$  NMR (126 MHz,  $\text{CDCl}_3$ )  $\delta$  188.4, 160.5, 158.8, 157.6, 153.0, 152.7, 145.7, 130.9, 128.0, 124.2, 120.7, 113.1, 112.5, 109.7, 109.2, 97.0, 60.9, 55.8, 45.1, 12.4; HRMS (ESI) calc. for  $\text{C}_{22}\text{H}_{23}\text{NO}_5\text{Na}$  404.1474  $[\text{M} + \text{Na}]^+$ , found 404.1479.

Compound **S8**. Yield 80%. M.p. 169-171°C

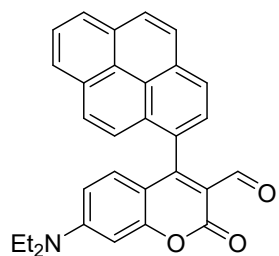

$^1\text{H}$  NMR (500 MHz,  $\text{CDCl}_3$ )  $\delta$  9.79 (s, 1H, CHO), 8.30 - 8.22 (m, 2H, H-Ar), 8.21 – 8.12 (m, 3H, H-Ar), 8.04 (t,  $J = 7.6$  Hz, 1H, H-Ar), 8.01 (d,  $J = 9.1$  Hz, 1H, H-Ar), 7.83 (d,  $J = 7.8$  Hz, 1H, H-Ar), 7.72 (d,  $J = 9.1$  Hz, 1H, H-Ar), 6.63 – 6.55 (m, 2H, H-Ar), 6.30 (dd,  $J = 9.3, 2.6$  Hz, 1H, H-Ar), 3.41 (q,  $J = 7.1$  Hz, 4H,  $\text{CH}_2$ ), 1.19 (t,  $J = 7.1$  Hz, 6H,  $\text{CH}_3$ );  $^{13}\text{C}$  NMR (126 MHz,  $\text{CDCl}_3$ )  $\delta$  188.0, 161.4, 160.0, 157.8, 153.2, 131.8, 131.3, 131.2, 130.8, 128.8, 128.7, 128.3, 128.0, 127.3, 126.4, 125.9 (2), 125.7, 124.5 (3), 124.1, 113.6, 109.9, 109.8, 97.0, 45.2, 12.4; HRMS (ESI) calc. for  $\text{C}_{30}\text{H}_{24}\text{NO}_3$  446.1756  $[\text{M} + \text{H}]^+$ , found 446.1761.



General procedure for the preparation of compounds **4-7**.

Aldehyde (**1**, **S6-S8**) (1 mmol), dimethyl-1,3-acetonedicarboxylate (**2**) (10 mmol) and piperidine (1 mmol) were dissolved in methanol (3 ml) and allowed to stir at 60°C for 20h. The solvent was evaporated and the residue was washed with diethyl ether. The crude product was purified via column chromatography (CH<sub>2</sub>Cl<sub>2</sub> : MeOH 93:7).

Compound **4**. Yield 28%. M.p. 258-260°C

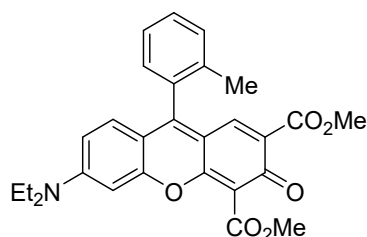

<sup>1</sup>H NMR (500 MHz, CDCl<sub>3</sub>) δ 7.52 (s, 1H, H-Ar), 7.45 (td, *J* = 7.6, 1.4 Hz, 1H, H-Ar), 7.4 – 7.33 (m, 2H, H-Ar), 7.12 (d, *J* = 7.5 Hz, 1H, H-Ar), 6.90 (d, *J* = 9.1 Hz, 1H, H-Ar), 6.62 – 6.55 (m, 2H, H-Ar), 4.01 (s, 3H, OCH<sub>3</sub>), 3.81 (s, 3H, OCH<sub>3</sub>), 3.50 (q, *J* = 7.3 Hz, 4H, CH<sub>2</sub>), 2.06 (s, 3H, CH<sub>3</sub> - Ar), 1.26 (t, *J* = 7.1 Hz, 6H, CH<sub>3</sub>); <sup>13</sup>C NMR (126 MHz, CDCl<sub>3</sub>) δ 176.7, 167.1, 166.4, 156.2, 155.6, 155.3, 153.6, 136.0, 135.1, 132.1, 130.7 (2), 129.7, 129.0, 128.2, 126.1, 113.0, 112.1, 111.1, 110.9, 96.9, 52.3, 52.2, 45.3, 19.6, 12.6; HRMS (ESI) calc. for C<sub>28</sub>H<sub>28</sub>NO<sub>6</sub> 474.1917 [M + H]<sup>+</sup>, found 474.1903.

Compound **5**. Yield 21%. M.p. 217-218°C

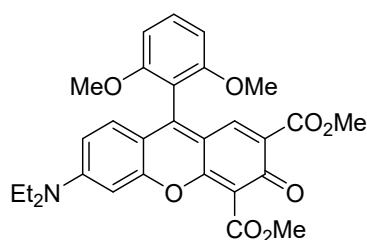

<sup>1</sup>H NMR (500 MHz, CDCl<sub>3</sub>) δ 7.61 (s, 1H, H-Ar), 7.51 – 7.41 (t, *J* = 8.4 Hz, 1H, H-Ar), 7.02 – 6.96 (m, 1H, H-Ar), 6.73 – 6.67 (m, 2H, H-Ar), 6.59 – 6.53 (m, 2H, H-Ar), 4.00 (s, 3H, OCH<sub>3</sub>), 3.82 (s, 3H, OCH<sub>3</sub>), 3.66 (s, 6H, OCH<sub>3</sub>), 3.48 (q, *J* = 7.1 Hz, 4H, CH<sub>2</sub>), 1.25 (t, *J* = 7.1 Hz, 6H, CH<sub>3</sub>); <sup>13</sup>C NMR (126 MHz, CDCl<sub>3</sub>) δ 176.8, 167.5, 166.7, 157.7, 156.3, 156.0, 153.4, 151.3, 135.8, 131.6, 130.4, 127.5, 113.3, 112.5, 111.5, 110.8, 109.5, 104.1, 96.7, 55.9, 52.2, 52.0, 45.1, 12.6; HRMS (ESI) calc. for C<sub>29</sub>H<sub>30</sub>NO<sub>8</sub> 520.1971 [M + H]<sup>+</sup>, found 520.1978.

Compound **6**. Yield 13%. M.p. 210-211°C

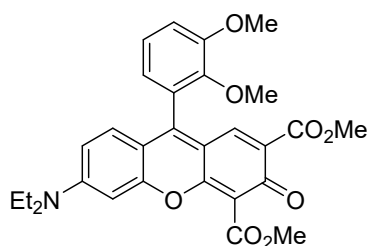

$^1\text{H}$  NMR (500 MHz,  $\text{CDCl}_3$ )  $\delta$  7.70 (s, 1H, H-Ar), 7.21 (t,  $J = 7.9$  Hz, 1H, H-Ar), 7.11 (dd,  $J = 8.3, 1.5$  Hz, 1H, H-Ar), 7.06 – 7.01 (m, 1H, H-Ar), 6.73 (dd,  $J = 7.7, 1.5$  Hz, 1H, H-Ar), 6.61 – 6.55 (m, 2H, H-Ar), 4.01 (s, 3H,  $\text{OCH}_3$ ), 3.96 (s, 3H,  $\text{OCH}_3$ ), 3.82 (s, 3H,  $\text{OCH}_3$ ), 3.61 (s, 3H,  $\text{OCH}_3$ ), 3.49 (q,  $J = 7.2$  Hz, 4H,  $\text{CH}_2$ ), 1.25 (t,  $J = 7.1$  Hz, 6H,  $\text{CH}_3$ );  $^{13}\text{C}$  NMR (126 MHz,  $\text{CDCl}_3$ )  $\delta$  176.6, 167.1, 166.4, 156.1, 155.6, 153.6, 152.9, 152.8, 146.5, 135.4, 131.0, 127.7, 126.7, 124.4, 121.8, 113.8, 112.8, 112.4, 111.2, 110.9, 96.7, 61.2, 55.8, 52.2, 52.0, 45.2, 12.5; HRMS (ESI) calc. for  $\text{C}_{29}\text{H}_{30}\text{NO}_8$  520.1977  $[\text{M} + \text{H}]^+$ , found 520.1978.

Compound **7**. Yield 23%. M.p. 211-213°C

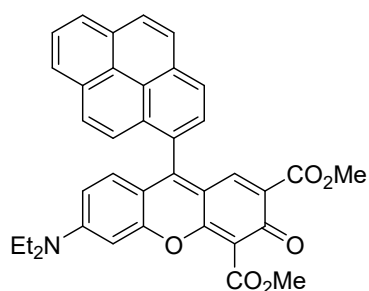

$^1\text{H}$  NMR (500 MHz,  $\text{CDCl}_3$ )  $\delta$  8.33 (d,  $J = 7.8$  Hz, 1H, H-Ar), 8.29 (d,  $J = 7.7$  Hz, 1H, H-Ar), 8.25 – 8.15 (m, 3H, H-Ar), 8.07 (t,  $J = 7.6$  Hz, 1H, H-Ar), 8.01 (d,  $J = 9.1$  Hz, 1H, H-Ar), 7.86 (d,  $J = 7.8$  Hz, 1H, H-Ar), 7.61 (d,  $J = 9.1$  Hz, 1H, H-Ar), 7.43 (s, 1H, H-Ar), 6.73 (d,  $J = 9.4$  Hz, 1H, H-Ar), 6.67 (d,  $J = 2.5$  Hz, 1H, H-Ar), 6.41 (dd,  $J = 9.4, 2.5$  Hz, 1H, H-Ar), 4.05 (s, 3H,  $\text{OCH}_3$ ), 3.64 (s, 3H,  $\text{OCH}_3$ ), 3.47 (q,  $J = 7.2$  Hz, 4H,  $\text{CH}_2$ ), 1.24 (t,  $J = 7.1$  Hz, 6H,  $\text{CH}_3$ );  $^{13}\text{C}$  NMR (126 MHz,  $\text{CDCl}_3$ )  $\delta$  176.7, 166.8, 166.4, 156.1, 155.6, 154.7, 153.6, 135.3, 132.3, 131.3, 130.8, 129.5, 129.1, 128.8, 128.3, 127.2, 126.9, 126.8, 126.6, 126.2, 126.0, 124.6 (2), 124.4, 124.1, 113.6, 113.0, 112.1, 111.1, 96.9, 52.4, 52.0, 45.3, 12.6; HRMS (ESI) calc. for  $\text{C}_{37}\text{H}_{30}\text{NO}_6$  584.2073  $[\text{M} + \text{H}]^+$ , found 584.2075.

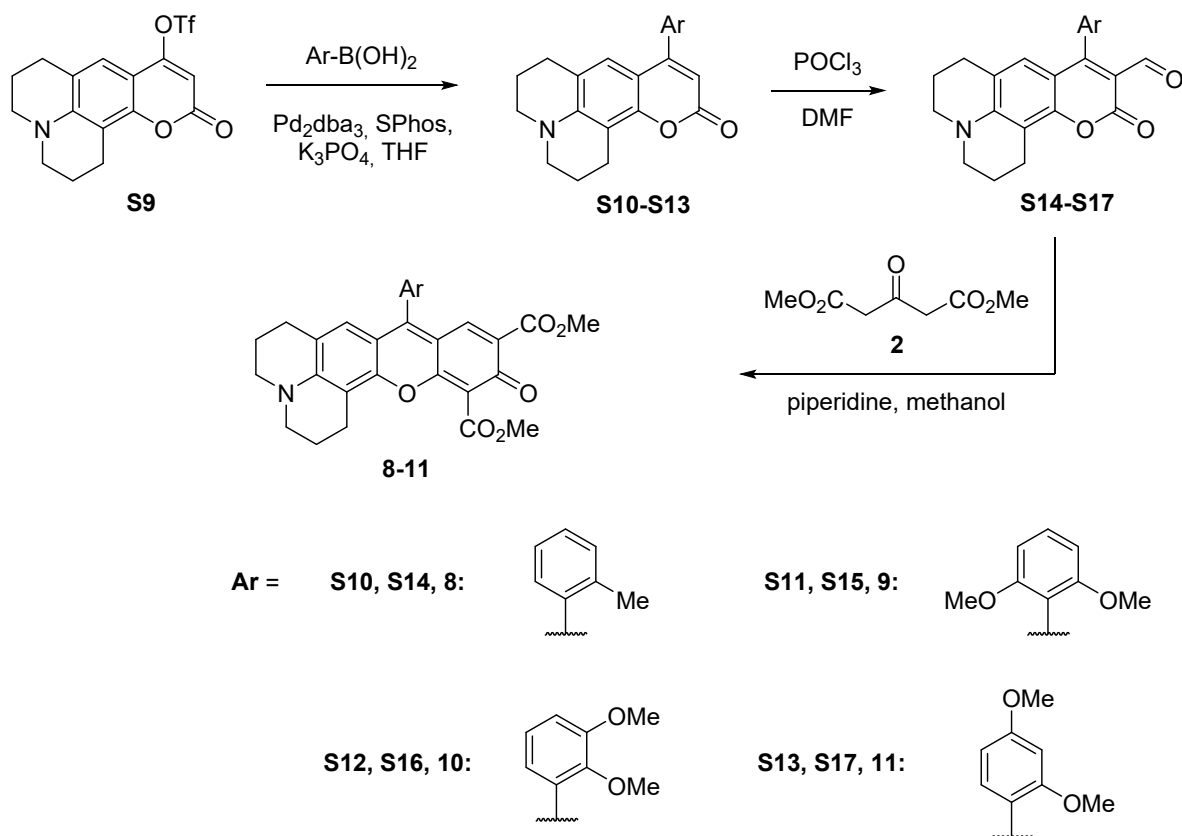

**Scheme S3.** Synthetic route from coumarin **S9** to rhodols **8-11**.

General procedure for the preparation of compounds **S10-S13**.

Compound **S9** (10 mmol), arylboronic acid (15 mmol), bis(dibenzylideneacetone)-palladium(0) (0.25 mmol), 2-dicyclohexylphosphino-2',6'-dimethoxybiphenyl (SPhos) (0.75 mmol) and tribasic potassium phosphate (40 mmol) were placed under Ar in a flame-dried Schlenk flask. Dry and degassed THF (75 ml) was added and the reaction mixture was stirred at 70°C for 7h under inert atmosphere. After the reaction was complete the mixture was diluted with DCM, filtered through celite and washed with NaHCO<sub>3</sub> solution (3 × 150 ml). The organic layer was dried over Na<sub>2</sub>SO<sub>4</sub> and concentrated under vacuo. The residue was recrystallized from methanol.

Compound **S10**. Yield 90%. M.p. 166-167°C

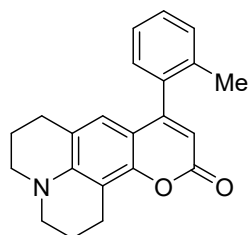

$^1\text{H}$  NMR (600 MHz,  $\text{CDCl}_3$ )  $\delta$  7.37 – 7.34 (m, 1H, H-Ar), 7.32 – 7.26 (m, 2H, H-Ar), 7.14 (dd,  $J = 7.6, 1.4$  Hz, 1H, H-Ar), 6.39 (s, 1H, H-Ar), 5.89 (s, 1H, C-H), 3.29 – 3.21 (m, 4H,  $\text{CH}_2$ ), 2.95 (t,  $J = 6.5$  Hz, 2H,  $\text{CH}_2$ ), 2.60 (t,  $J = 6.5$  Hz, 2H,  $\text{CH}_2$ ), 2.17 (s, 3H,  $\text{CH}_3$ -Ar), 2.02 – 1.97 (m, 2H,  $\text{CH}_2$ ), 1.93 – 1.88 (m,  $J = 7.9, 5.5$  Hz, 2H,  $\text{CH}_2$ );  $^{13}\text{C}$  NMR (151 MHz,  $\text{CDCl}_3$ )  $\delta$  162.5, 156.6, 151.4, 145.9, 136.2, 135.3, 130.2, 128.5, 128.4, 125.7, 123.8, 118.2, 108.3, 108.2, 106.8, 49.9, 49.5, 27.5, 21.5, 20.6, 20.5, 19.7; HRMS (ESI) calc. for  $\text{C}_{22}\text{H}_{21}\text{NO}_2\text{Na}$  354.1470  $[\text{M} + \text{Na}]^+$ , found 354.1469.

Compound **S11**. Yield 94%.

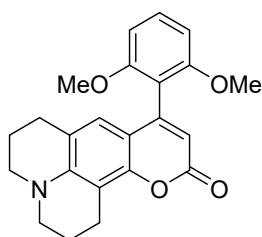

$^1\text{H}$  NMR (500 MHz,  $\text{CDCl}_3$ )  $\delta$  7.36 (t,  $J = 8.4$  Hz, 1H, H-Ar), 6.66 (d,  $J = 8.4$  Hz, 2H, H-Ar), 6.43 (s, 1H, H-Ar), 5.92 (s, 1H, C-H), 3.70 (s, 6H,  $\text{OCH}_3$ ), 3.23 – 3.19 (m, 4H,  $\text{CH}_2$ ), 2.94 (t,  $J = 6.6$  Hz, 2H,  $\text{CH}_2$ ), 2.62 (t,  $J = 6.4$  Hz, 2H,  $\text{CH}_2$ ), 2.02 – 1.99 (m, 2H,  $\text{CH}_2$ ), 1.97 – 1.93 (m, 2H,  $\text{CH}_2$ );  $^{13}\text{C}$  NMR (126 MHz,  $\text{CDCl}_3$ )  $\delta$  162.9, 157.6, 151.4, 150.7, 145.6, 130.1, 123.4, 117.9, 114.0, 110.3, 109.0, 106.7, 104.1, 56.0, 50.0, 49.6, 27.5, 21.6, 20.8, 20.6; HRMS (ESI) calc. for  $\text{C}_{23}\text{H}_{23}\text{NO}_4\text{Na}$  400.1525  $[\text{M} + \text{Na}]^+$ , found 400.1529.

Compound **S12**. Yield 89%. M.p. 208-210°C

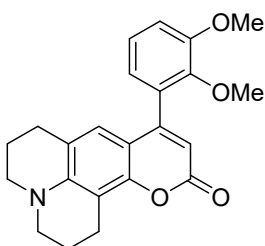

$^1\text{H}$  NMR (500 MHz,  $\text{CDCl}_3$ )  $\delta$  7.13 (t,  $J = 7.9$  Hz, 1H, H-Ar), 7.02 (dd,  $J = 8.3, 1.5$  Hz, 1H, H-Ar), 6.78 (dd,  $J = 7.7, 1.5$  Hz, 1H, H-Ar), 6.56 (s, 1H, H-Ar), 5.97 (s, 1H, C-H), 3.93 (s, 3H,  $\text{OCH}_3$ ), 3.67 (s, 3H,  $\text{OCH}_3$ ), 3.27 – 3.20 (m, 4H,  $\text{CH}_2$ ), 2.94 (t,  $J = 6.5$  Hz, 2H,  $\text{CH}_2$ ), 2.69 – 2.55 (m, 2H,  $\text{CH}_2$ ), 2.02 – 1.96 (m, 2H,  $\text{CH}_2$ ), 1.92 – 1.87 (m, 2H,  $\text{CH}_2$ );  $^{13}\text{C}$  NMR (126 MHz,  $\text{CDCl}_3$ )  $\delta$  162.5, 153.9, 152.8, 151.3, 146.2, 145.9, 131.0, 124.2, 124.1, 121.6, 118.1, 112.8, 108.4, 108.4, 106.6, 61.3, 55.8, 50.0, 49.5, 27.5, 21.5, 20.7, 20.5; HRMS (ESI) calc. for  $\text{C}_{23}\text{H}_{23}\text{NO}_4\text{Na}$  400.1525  $[\text{M} + \text{Na}]^+$ , found 400.1522.

Compound **S13**. Yield 84%. M.p. 201-203°C

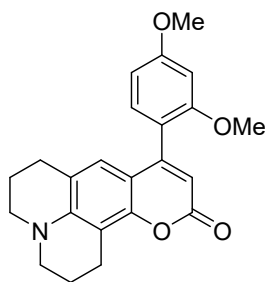

$^1\text{H}$  NMR (500 MHz,  $\text{CDCl}_3$ )  $\delta$  7.13 – 7.08 (m, 1H, H-Ar), 6.59 – 6.57 (m, 3H, H-Ar), 5.95 (s, 1H, C-H), 3.87 (s, 3H,  $\text{OCH}_3$ ), 3.73 (s, 3H,  $\text{OCH}_3$ ), 3.23 (t,  $J = 5.8$  Hz, 4H,  $\text{CH}_2$ ), 2.93 (t,  $J = 6.5$  Hz, 2H,  $\text{CH}_2$ ), 2.64 (t,  $J = 6.4$  Hz, 2H,  $\text{CH}_2$ ), 2.01 - 1.96 (m,  $J = 6.2$  Hz, 2H,  $\text{CH}_2$ ), 1.94 – 1.89 (d,  $J = 6.0$  Hz, 2H,  $\text{CH}_2$ );  $^{13}\text{C}$  NMR (126 MHz,  $\text{CDCl}_3$ )  $\delta$  162.8, 161.5, 157.6, 153.9, 151.3, 145.6, 130.8, 124.2, 118.3, 117.8, 109.2, 108.8, 106.7, 104.5, 99.0, 55.6, 55.5, 49.9, 49.6, 27.6, 21.6, 20.8, 20.5; HRMS (ESI) calc. for  $\text{C}_{23}\text{H}_{23}\text{NO}_4\text{Na}$  400.1525  $[\text{M} + \text{Na}]^+$ , found 400.1530.

General procedure for the preparation of compounds **S14-S17**.

Phosphorus oxychloride (7.7 mmol) was added dropwise to a solution of 7-diethylamino-4-aryl-coumarin (**S10-S13**) (5 mmol) in DMF (15 ml) upon cooling on ice. The reaction mixture was allowed to stir at  $50^\circ\text{C}$  for 24h. The solution then was cooled to room temperature, poured into  $\text{NaHCO}_3$  aqueous solution (20 g in 100 ml  $\text{H}_2\text{O}$ ) with 300 ml of crashed ice. The precipitate which formed was filtered, washed with distilled water and methanol, dried under vacuo and purified via recrystallization from  $\text{MeOH}/\text{CH}_2\text{Cl}_2$ .

Compound **S14**. Yield 84%. M.p.  $201\text{-}203^\circ\text{C}$

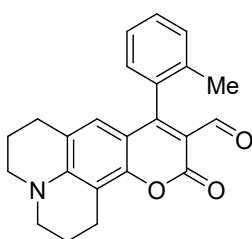

$^1\text{H}$  NMR (500 MHz,  $\text{CDCl}_3$ )  $\delta$  9.80 (s, 1H, CHO), 7.38 (t,  $J = 7.5$  Hz, 1H, H-Ar), 7.33 – 7.24 (m, 2H, H-Ar), 7.03 (d,  $J = 7.5$  Hz, 1H, H-Ar), 6.35 (s, 1H, H-Ar), 3.36 – 3.32 (m, 4H,  $\text{CH}_2$ ), 2.94 (t,  $J = 6.4$  Hz, 2H,  $\text{CH}_2$ ), 2.57 (t,  $J = 6.2$  Hz, 2H,  $\text{CH}_2$ ), 2.08 (s, 3H,  $\text{CH}_3\text{-Ar}$ ), 2.00 (quint,  $J = 6.2$  Hz, 2H,  $\text{CH}_2$ ), 1.90 (quint,  $J = 6.3$  Hz, 2H,  $\text{CH}_2$ );  $^{13}\text{C}$  NMR (126 MHz,  $\text{CDCl}_3$ )  $\delta$  188.4, 161.6, 160.3, 152.9, 149.0, 135.2, 133.5, 130.0, 128.7, 127.8, 126.1, 125.7, 119.5, 111.3, 108.4, 106.0, 50.3, 49.9, 27.5, 21.1, 20.2, 20.2, 19.5; HRMS (ESI) calc. for  $\text{C}_{23}\text{H}_{22}\text{NO}_3$  360.1600  $[\text{M} + \text{H}]^+$ , found 360.1588.

Compound **S15**. Yield 87%. M.p.  $263\text{-}265^\circ\text{C}$

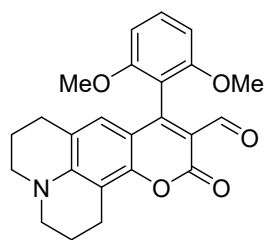

$^1\text{H}$  NMR (500 MHz,  $\text{CDCl}_3$ )  $\delta$  9.77 (s, 1H, CHO), 7.41 (t,  $J = 8.4$  Hz, 1H, H-Ar), 6.66 (d,  $J = 8.4$  Hz, 2H, H-Ar), 6.49 (s, 1H, H-Ar), 3.68 (s, 6H,  $\text{OCH}_3$ ), 3.34 – 3.28 (m, 4H,  $\text{CH}_2$ ), 2.92 (t,  $J = 6.4$  Hz, 2H,  $\text{CH}_2$ ), 2.60 (t,  $J = 6.3$  Hz, 2H,  $\text{CH}_2$ ), 1.97 (quint,  $J = 6.1$  Hz, 2H,  $\text{CH}_2$ ), 1.91 (quint,  $J = 6.1$  Hz, 2H,  $\text{CH}_2$ );  $^{13}\text{C}$  NMR (126 MHz,  $\text{CDCl}_3$ )  $\delta$  188.8, 160.4, 157.3, 157.1, 152.8, 148.7, 130.7, 125.5, 119.1, 112.3, 110.8, 108.7, 105.8, 103.9, 56.0, 50.2, 49.9, 49.6, 27.5, 21.1, 20.3 (2); HRMS (ESI) calc. for  $\text{C}_{24}\text{H}_{23}\text{NO}_5\text{Na}$  428.1474  $[\text{M} + \text{Na}]^+$ , found 428.1472.

Compound **S16**. Yield 86%. M.p. 242-244°C

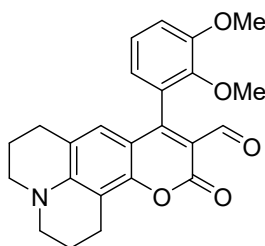

$^1\text{H}$  NMR (500 MHz,  $\text{CDCl}_3$ )  $\delta$  9.89 (s, 1H, CHO), 7.15 (t,  $J = 7.9$  Hz, 1H, H-Ar), 7.06 (d,  $J = 8.2$  Hz, 1H, H-Ar), 6.64 (d,  $J = 7.6$  Hz, 1H, H-Ar), 6.50 (s, 1H, H-Ar), 3.94 (s, 3H,  $\text{OCH}_3$ ), 3.66 (s, 3H,  $\text{OCH}_3$ ), 3.36 – 3.32 (m, 4H,  $\text{CH}_2$ ), 2.91 (t,  $J = 6.4$  Hz, 2H,  $\text{CH}_2$ ), 2.59 (t,  $J = 6.4$  Hz, 2H,  $\text{CH}_2$ ), 1.97 (quint,  $J = 6.2$  Hz, 2H,  $\text{CH}_2$ ), 1.89 (quint,  $J = 6.0$  Hz, 2H,  $\text{CH}_2$ );  $^{13}\text{C}$  NMR (126 MHz,  $\text{CDCl}_3$ )  $\delta$  188.0, 160.1, 158.4, 152.3, 152.2, 148.7, 145.2, 127.8, 126.0, 123.7, 120.3, 119.2, 112.6, 110.6, 108.3, 105.3, 60.4, 55.4, 49.9, 49.4, 27.0, 20.5, 19.7 (2); HRMS (ESI) calc. for  $\text{C}_{24}\text{H}_{23}\text{NO}_5\text{Na}$  428.1474  $[\text{M} + \text{Na}]^+$ , found 428.1481.

Compound **S17**. Yield 32%. M.p. 210-211°C

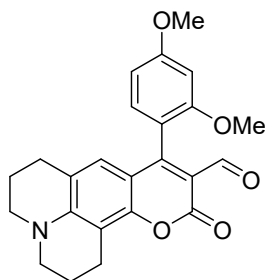

$^1\text{H}$  NMR (500 MHz,  $\text{CDCl}_3$ )  $\delta$  9.80 (s, 1H, CHO), 6.97 (d,  $J = 8.3$  Hz, 1H, H-Ar), 6.60 (dd,  $J = 8.3, 2.3$  Hz, 1H, H-Ar), 6.57-6.56 (m, 2H, H-Ar), 3.88 (s, 3H,  $\text{OCH}_3$ ), 3.70 (s, 3H,  $\text{OCH}_3$ ), 3.35 – 3.29 (m, 4H,  $\text{CH}_2$ ), 2.92 (t,

$J = 6.4$  Hz, 2H, CH<sub>2</sub>), 2.64 – 2.58 (m, 2H, CH<sub>2</sub>), 2.02 – 1.95 (m, 2H, CH<sub>2</sub>), 1.93 – 1.88 (m, 2H, CH<sub>2</sub>); <sup>13</sup>C NMR (126 MHz, CDCl<sub>3</sub>)  $\delta$  188.9, 161.7, 160.3, 159.1, 157.7, 152.9, 148.6, 130.3, 126.3, 119.1, 114.8, 112.1, 109.1, 106.0, 104.5, 98.7, 55.7, 55.5, 50.2, 49.9, 27.5, 21.1, 20.3 (2); HRMS (ESI) calc. for C<sub>24</sub>H<sub>23</sub>NO<sub>5</sub>Na 428.1474 [M + Na]<sup>+</sup>, found 428.1472.

General procedure for the preparation of compounds **8-11**.

3-formyl coumarin (**S14-S17**) (1 mmol), dimethyl-1,3-acetonedicarboxylate (**2**) (10 mmol) and piperidine (1 mmol) were dissolved in methanol (5 ml) and allowed to stir at 60°C for 20h. The solvent was evaporated and the residue was washed with diethyl ether. The crude product was purified via column chromatography (CH<sub>2</sub>Cl<sub>2</sub> : MeOH 9:1).

Compound **8**. Yield 19%. M.p. 265-266°C

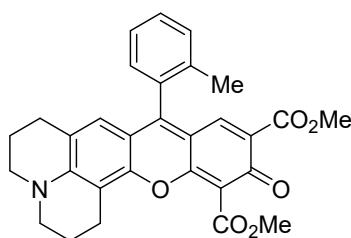

<sup>1</sup>H NMR (500 MHz, CDCl<sub>3</sub>)  $\delta$  7.49 – 7.41 (m, 2H, H-Ar), 7.38 – 7.33 (m, 2H, H-Ar), 7.10 – 7.08 (m, 1H, H-Ar), 6.47 (s, 1H, H-Ar), 3.98 (s, 3H, OCH<sub>3</sub>), 3.80 (s, 3H, OCH<sub>3</sub>), 3.41 -3.37 (m, 4H, CH<sub>2</sub>), 2.95 – 2.91 (m, 2H, CH<sub>2</sub>), 2.63 (t,  $J = 6.2$  Hz, 2H, CH<sub>2</sub>), 2.08 – 1.99 (m, 5H, CH<sub>3</sub>-Ar, CH<sub>2</sub>), 1.98 – 1.89 (m, 2H, CH<sub>2</sub>); <sup>13</sup>C NMR (126 MHz, CDCl<sub>3</sub>)  $\delta$  176.2, 167.4, 166.6, 155.8, 155.0, 151.1, 149.7, 136.0, 134.8, 132.5, 130.6, 129.5, 129.0, 127.8, 126.1, 126.0, 121.2, 112.2, 111.1, 110.8, 105.8, 52.2, 52.1, 50.5, 50.2, 27.5, 20.9, 20.0, 19.8, 19.6; HRMS (ESI) calc. for C<sub>30</sub>H<sub>28</sub>NO<sub>6</sub> 498.1917 [M + H]<sup>+</sup>, found 498.1921.

Compound **9**. Yield 28%. M.p. 260-262°C

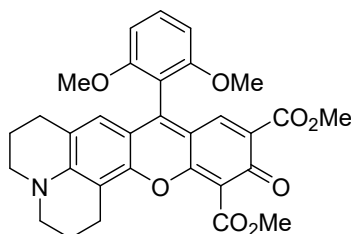

<sup>1</sup>H NMR (500 MHz, CDCl<sub>3</sub>)  $\delta$  7.57 (s, 1H, H-Ar), 7.46 (t,  $J = 8.4$  Hz, 1H, H-Ar), 6.70 (d,  $J = 8.4$  Hz, 2H, H-Ar), 6.57 (s, 1H, H-Ar), 3.98 (s, 3H, OCH<sub>3</sub>), 3.82 (s, 3H, OCH<sub>3</sub>), 3.65 (s, 6H, OCH<sub>3</sub>), 3.41 – 3.34 (m, 4H, CH<sub>2</sub>), 2.93 (t,  $J = 6.4$  Hz, 2H, CH<sub>2</sub>), 2.65 (t,  $J = 6.2$  Hz, 2H, CH<sub>2</sub>), 2.03 - 1.98 (m, 2H, CH<sub>2</sub>), 1.97 – 1.92 (m, 2H, CH<sub>2</sub>); <sup>13</sup>C NMR (126 MHz, CDCl<sub>3</sub>)  $\delta$  176.4, 167.9, 166.9, 157.7, 156.3, 151.3, 151.0, 149.6, 135.5,

131.5, 127.0, 126.1, 120.9, 112.1, 111.8, 111.5, 109.9, 105.5, 104.1, 56.0, 52.1, 52.0, 50.5, 50.2, 27.6, 21.1, 20.2, 19.8; HRMS (ESI) calc. for  $C_{31}H_{30}NO_8$  544.1971  $[M + H]^+$ , found 544.1970.

Compound **10**. Yield 28%. M.p. 200°C (dec.)

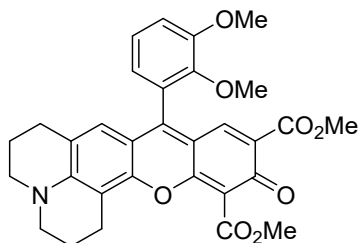

$^1H$  NMR (500 MHz,  $CDCl_3$ )  $\delta$  7.66 (s, 1H, H-Ar), 7.21 (t,  $J = 7.9$  Hz, 1H, H-Ar), 7.10 (d,  $J = 8.2$  Hz, 1H, H-Ar), 6.74 – 6.68 (m, 1H, H-Ar), 6.60 (s, 1H, H-Ar), 3.98 (s, 3H,  $OCH_3$ ), 3.97 (s, 3H,  $OCH_3$ ), 3.81 (s, 3H,  $OCH_3$ ), 3.59 (s, 3H,  $OCH_3$ ), 3.41 – 3.37 (m, 4H,  $CH_2$ ), 2.92 (t,  $J = 6.4$  Hz, 2H,  $CH_2$ ), 2.65 – 2.62 (m, 2H,  $CH_2$ ), 2.03 – 2.00 (m, 2H,  $CH_2$ ), 1.95 – 1.90 (m, 2H,  $CH_2$ );  $^{13}C$  NMR (126 MHz,  $CDCl_3$ )  $\delta$  176.2, 167.6, 166.6, 152.9, 146.5, 135.3, 127.1 (2), 126.6, 124.3, 121.9, 113.6, 111.4, 105.6, 61.2, 55.8, 52.1, 52.0, 50.5, 50.2, 27.5, 20.9, 20.1, 19.8; HRMS (ESI) calc. for  $C_{31}H_{30}NO_8$  544.1971  $[M + H]^+$ , found 544.1974.

Compound **11**. Yield 16%. M.p. 181°C(dec.)

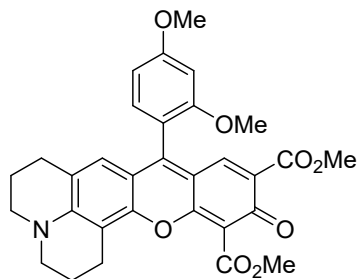

$^1H$  NMR (500 MHz,  $CDCl_3$ )  $\delta$  7.64 (s, 1H, H-Ar), 7.02 (d,  $J = 8.3$  Hz, 1H, H-Ar), 6.68 – 6.60 (m, 3H, H-Ar), 3.97 (s, 3H,  $OCH_3$ ), 3.91 (s, 3H,  $OCH_3$ ), 3.82 (s, 3H,  $OCH_3$ ), 3.68 (s, 3H,  $OCH_3$ ), 3.40 – 3.36 (m, 4H,  $CH_2$ ), 2.92 (t,  $J = 6.3$  Hz, 2H,  $CH_2$ ), 2.66 (t,  $J = 6.3$  Hz, 2H,  $CH_2$ ), 2.01 (quint,  $J = 6.2$  Hz, 2H,  $CH_2$ ), 1.99 – 1.90 (m, 2H,  $CH_2$ );  $^{13}C$  NMR (126 MHz,  $CDCl_3$ )  $\delta$  176.2, 167.7, 166.7, 162.2, 158.0, 156.1, 153.1, 151.3, 149.5, 135.8, 131.4, 127.1, 126.6, 120.8, 114.0, 112.0, 111.9, 111.5, 105.6, 104.9, 99.1, 55.7, 55.5, 52.1, 52.0, 50.5, 50.2, 27.6, 21.0, 20.1, 19.8; HRMS (ESI) calc. for  $C_{31}H_{30}NO_8$  544.1971  $[M + H]^+$ , found 544.1975.

General procedure for the preparation of compounds **12**, **13**.



3-formyl coumarin (**S18**, **S19**) (1 mmol), dimethyl-1,3-acetonedicarboxylate (**2**) (10 mmol) and piperidine (1 mmol) were dissolved in methanol (5 ml) and allowed to stir at 60°C for 20h. The precipitate which formed was filtered and recrystallized from MeOH/CH<sub>2</sub>Cl<sub>2</sub>.

Compound **12**. Yield 21%. M.p. 250°C(dec.)

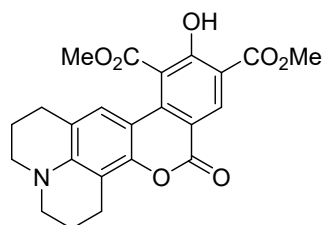

Starting compound **S18** was synthesized following a procedure described in the literature.<sup>1</sup>

<sup>1</sup>H NMR (500 MHz, CDCl<sub>3</sub>) δ 11.66 (s, 1H, OH), 8.92 (s, 1H, H-Ar), 7.09 (s, 1H, H-Ar), 4.01 (s, 3H, OCH<sub>3</sub>), 3.99 (s, 3H, OCH<sub>3</sub>), 3.28 – 3.24 (m, 4H, CH<sub>2</sub>), 2.89 (t, *J* = 6.5 Hz, 2H, CH<sub>2</sub>), 2.74 (t, *J* = 6.3 Hz, 2H, CH<sub>2</sub>), 1.98 (quint, *J* = 6.1 Hz, 4H, CH<sub>2</sub>); <sup>13</sup>C NMR (126 MHz, CDCl<sub>3</sub>) δ 169.5, 168.4, 162.6, 160.8, 149.4, 146.1, 139.0, 135.6, 122.9, 117.9, 115.6, 111.7, 110.5, 107.4, 103.4, 52.9, 52.7, 49.9, 49.3, 27.9, 21.5, 20.7, 20.6; HRMS (EI) calc. for C<sub>23</sub>H<sub>21</sub>NO<sub>7</sub> 423.1318 M<sup>+</sup>, found 423.1302.

Compound **30**. Yield 60%. M.p. 288-289°C

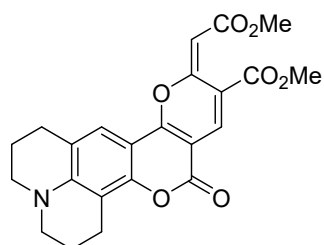

Starting compound **S19** was synthesized following a procedure described in the literature.<sup>2</sup>

<sup>1</sup>H NMR (500 MHz, 1,1,2,2-CD<sub>2</sub>Cl<sub>4</sub>) δ 8.04 (s, 1H), 7.58 (s, 1H), 6.38 (s, 1H), 3.82 (s, 3H, OCH<sub>3</sub>), 3.76 (s, 3H, OCH<sub>3</sub>), 3.37 – 3.32 (m, 4H, CH<sub>2</sub>), 2.85 – 2.82 (m, 4H, CH<sub>2</sub>), 1.99 – 1.94 (m, 4H, CH<sub>2</sub>); <sup>13</sup>C NMR (500 MHz, 1,1,2,2- CD<sub>2</sub>Cl<sub>4</sub>) δ 165.6, 163.4, 161.6, 159.6, 154.6, 151.9, 149.0, 136.9, 121.6, 119.9, 113.3, 106.0, 99.8, 95.8, 94.6, 52.2, 51.0, 50.2, 49.7, 27.7, 20.9, 20.1, 19.9; HRMS (ESI) calc. for C<sub>23</sub>H<sub>21</sub>NO<sub>7</sub>Na 446.1216 [M + Na]<sup>+</sup>, found 446.1218.

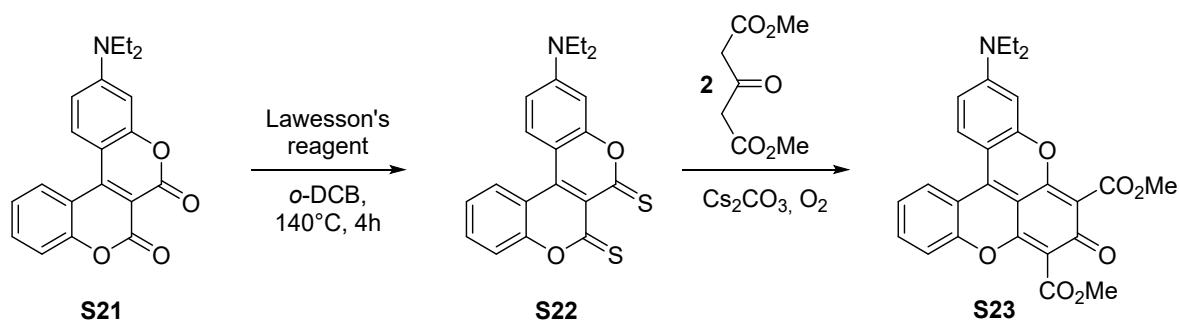

**Scheme S4.** Transformation of bis-coumarins into V-shaped rhodols.

Compound **S22**. Yield 18%. M.p. 170-171°C

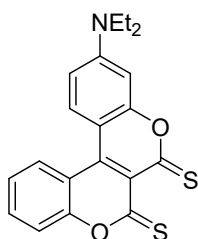

The starting compound **S21** was synthesized according to the literature procedure.<sup>3</sup> The bis-coumarin **S21** (1 mmol) together with Lawesson's reagent (1,25 mmol) were dissolved in 25 ml of dry *o*-DCB and the reaction was heated at 140°C for 4 hours. After the solvent was evaporated under the vacuo, the residue was filtered through a silica pad, washed with mixture of hexane and CH<sub>2</sub>Cl<sub>2</sub> (1:1) and concentrated under vacuo. The product was next purified via DCVC (CH<sub>2</sub>Cl<sub>2</sub> : hexane 1:2) followed by the recrystallization from the mixture of hexane and CH<sub>2</sub>Cl<sub>2</sub>.

<sup>1</sup>H NMR (500 MHz, CDCl<sub>3</sub>) δ 8.07 (dd, *J* = 8.1, 1.5 Hz, 1H, H-Ar), 7.96 (d, *J* = 9.3 Hz, 1H, H-Ar), 7.66 (ddd, *J* = 8.5, 7.2, 1.5 Hz, 1H, H-Ar), 7.42 (dd, *J* = 8.4, 1.2 Hz, 1H, H-Ar), 7.35 (ddd, *J* = 8.3, 7.3, 1.3 Hz, 1H, H-Ar), 6.75 (dd, *J* = 9.4, 2.7 Hz, 1H, H-Ar), 6.60 (d, *J* = 2.6 Hz, 1H, H-Ar), 3.50 (q, *J* = 7.2 Hz, 4H, CH<sub>2</sub>), 1.28 (t, *J* = 7.2 Hz, 6H, CH<sub>3</sub>); <sup>13</sup>C NMR (126 MHz, CDCl<sub>3</sub>) δ 190.6, 190.5, 158.6, 155.2, 153.3, 139.8, 134.1, 131.0, 129.2, 124.8, 121.1, 117.3, 117.0, 111.3, 105.6, 97.0, 45.4, 12.5; HRMS (EI) calc. for C<sub>20</sub>H<sub>17</sub>NO<sub>2</sub>S<sub>2</sub> 367.0701 M<sup>+</sup>, found 367.0706.

Compound **S23**. Yield 30%. M.p. 294-295°C

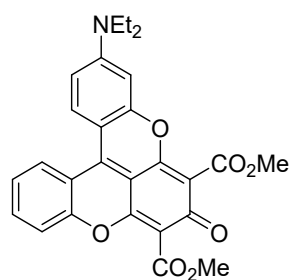

0,03 mmol of compound **S22**, 0,072 mmol of  $\text{Cs}_2\text{CO}_3$  and 0,3 mmol of dimethyl 1,3-acetonedicarboxylate were mixed together in 2 ml of  $\text{CH}_3\text{CN}$  and were allowed to stir at r.t. overnight. The solvent was evaporated and the residue was purified using DCVC (0,1-2% MeOH in  $\text{CH}_2\text{Cl}_2$ ).

$^1\text{H}$  NMR (500 MHz,  $\text{CDCl}_3$ )  $\delta$  8.27 (d,  $J = 8.1$  Hz, 1H, H-Ar), 8.14 (d,  $J = 9.4$  Hz, 1H, H-Ar), 7.65 (t,  $J = 7.8$  Hz, 1H, H-Ar), 7.46 (d,  $J = 8.3$  Hz, 1H, H-Ar), 7.37 (t,  $J = 7.7$  Hz, 1H, H-Ar), 6.74 (dd,  $J = 9.4, 2.7$  Hz, 1H, H-Ar), 6.55 (d,  $J = 2.6$  Hz, 1H, H-Ar), 3.98 (d,  $J = 7.1$  Hz, 6H,  $\text{OCH}_3$ ), 3.51 (q,  $J = 7.1$  Hz, 4H,  $\text{CH}_2$ ), 1.29 (t,  $J = 7.1$  Hz, 6H,  $\text{CH}_3$ );  $^{13}\text{C}$  NMR (126 MHz,  $\text{CDCl}_3$ )  $\delta$  175.4, 165.6, 165.4, 157.3, 154.2, 152.8, 151.3, 150.7, 140.1, 134.0, 129.7, 128.2, 124.5, 118.8, 116.3, 110.5, 105.4, 105.1, 98.1, 52.3, 52.3, 45.1, 12.6; HRMS (EI) calc. for  $\text{C}_{27}\text{H}_{23}\text{NO}_7$  473.1457  $\text{M}^+$ , found 473.1470.

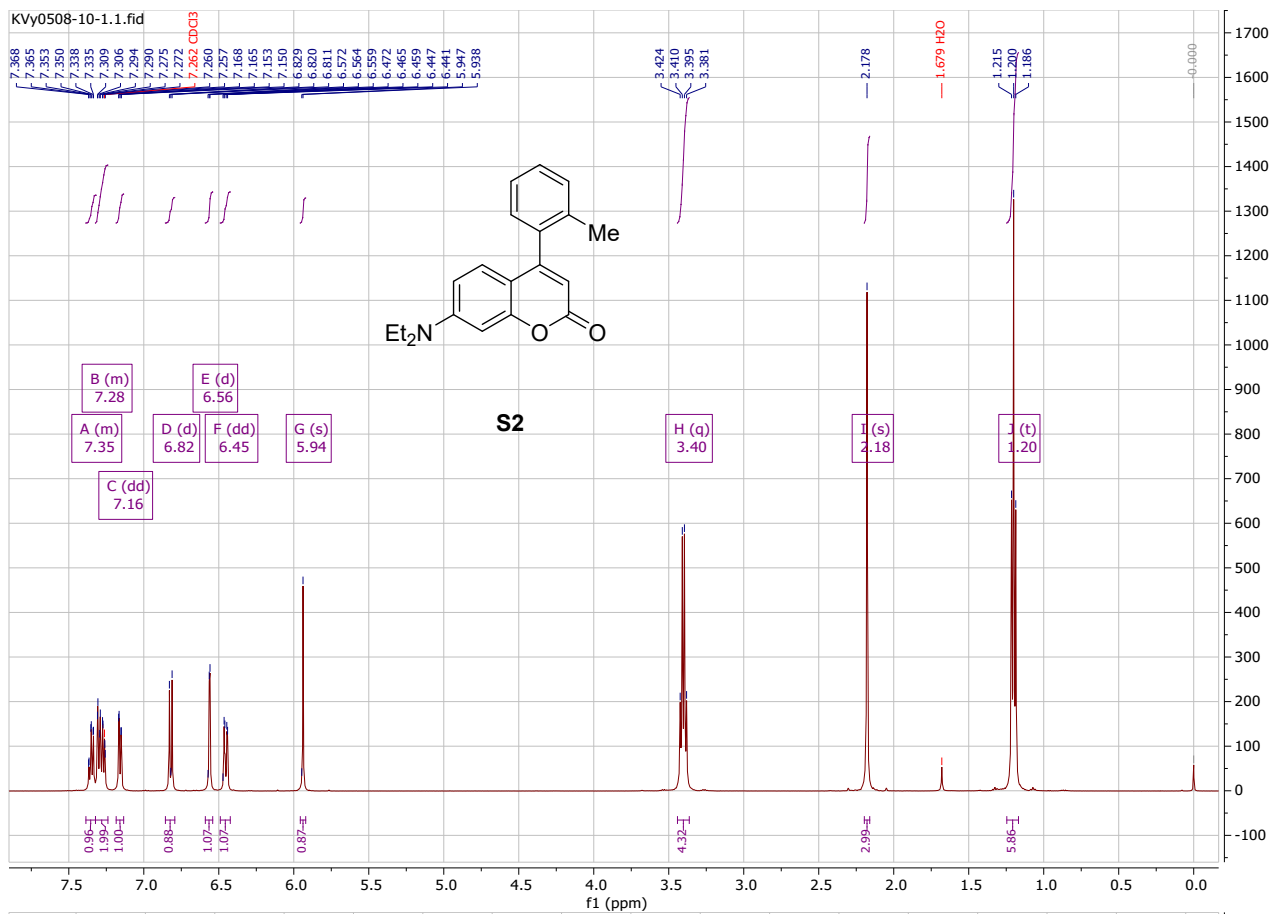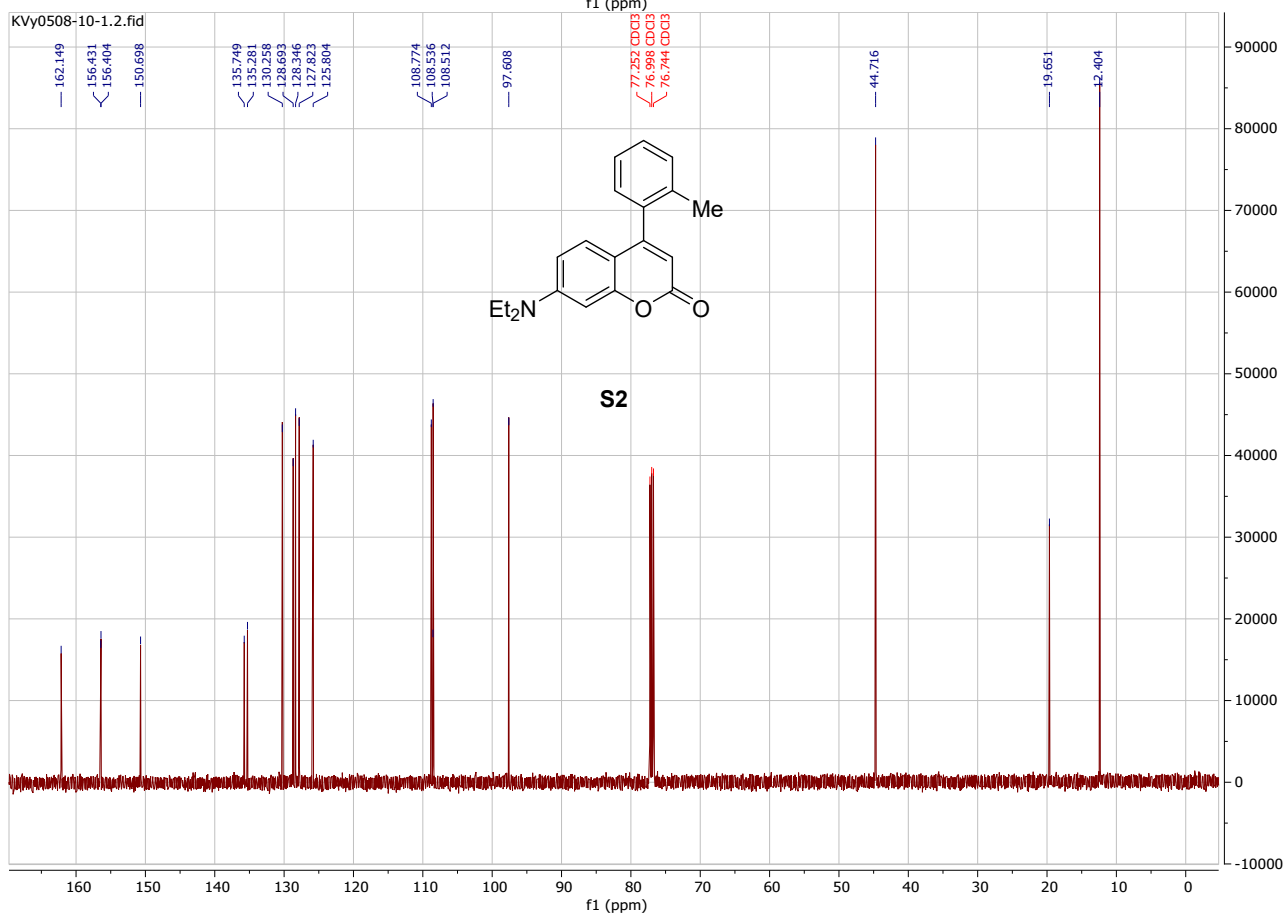

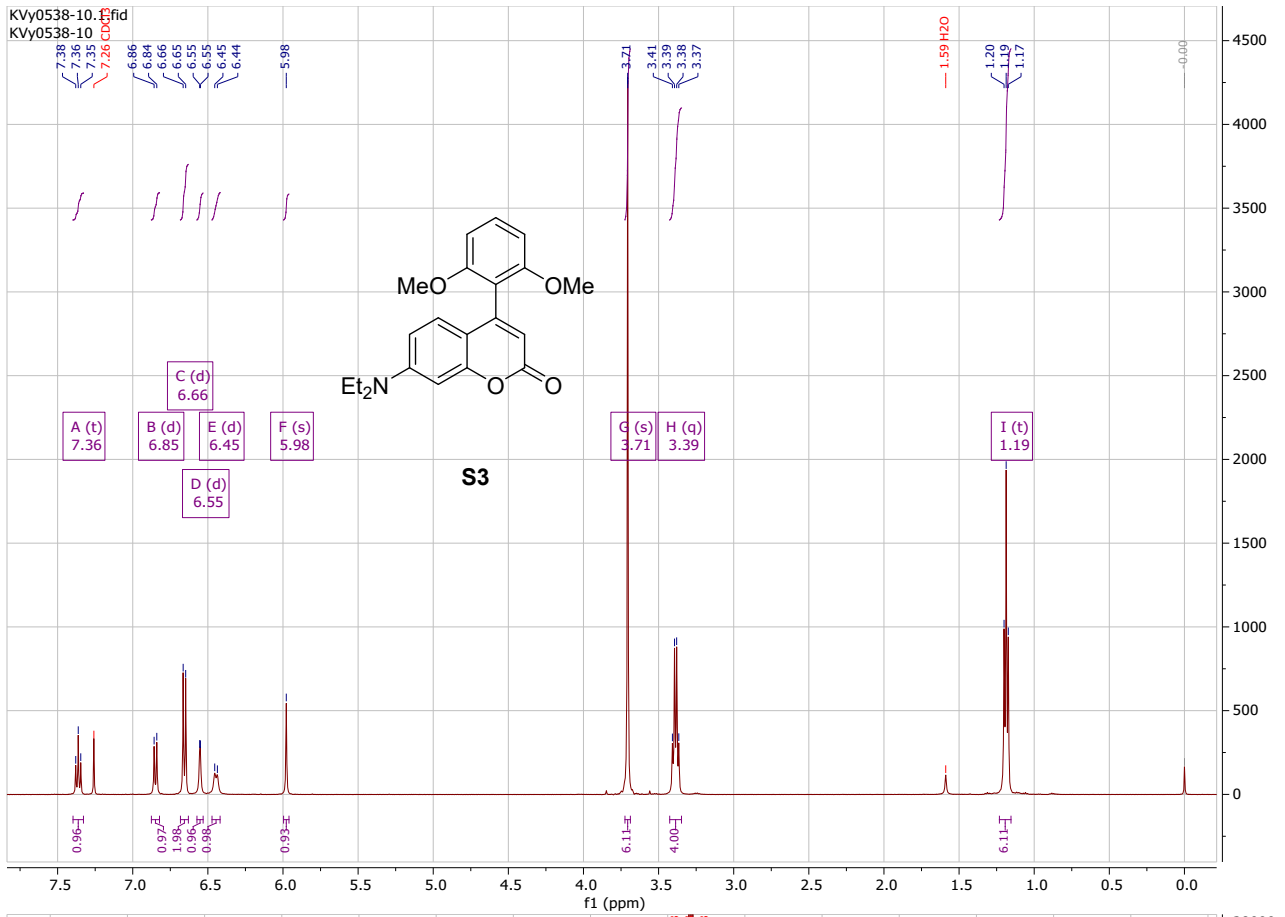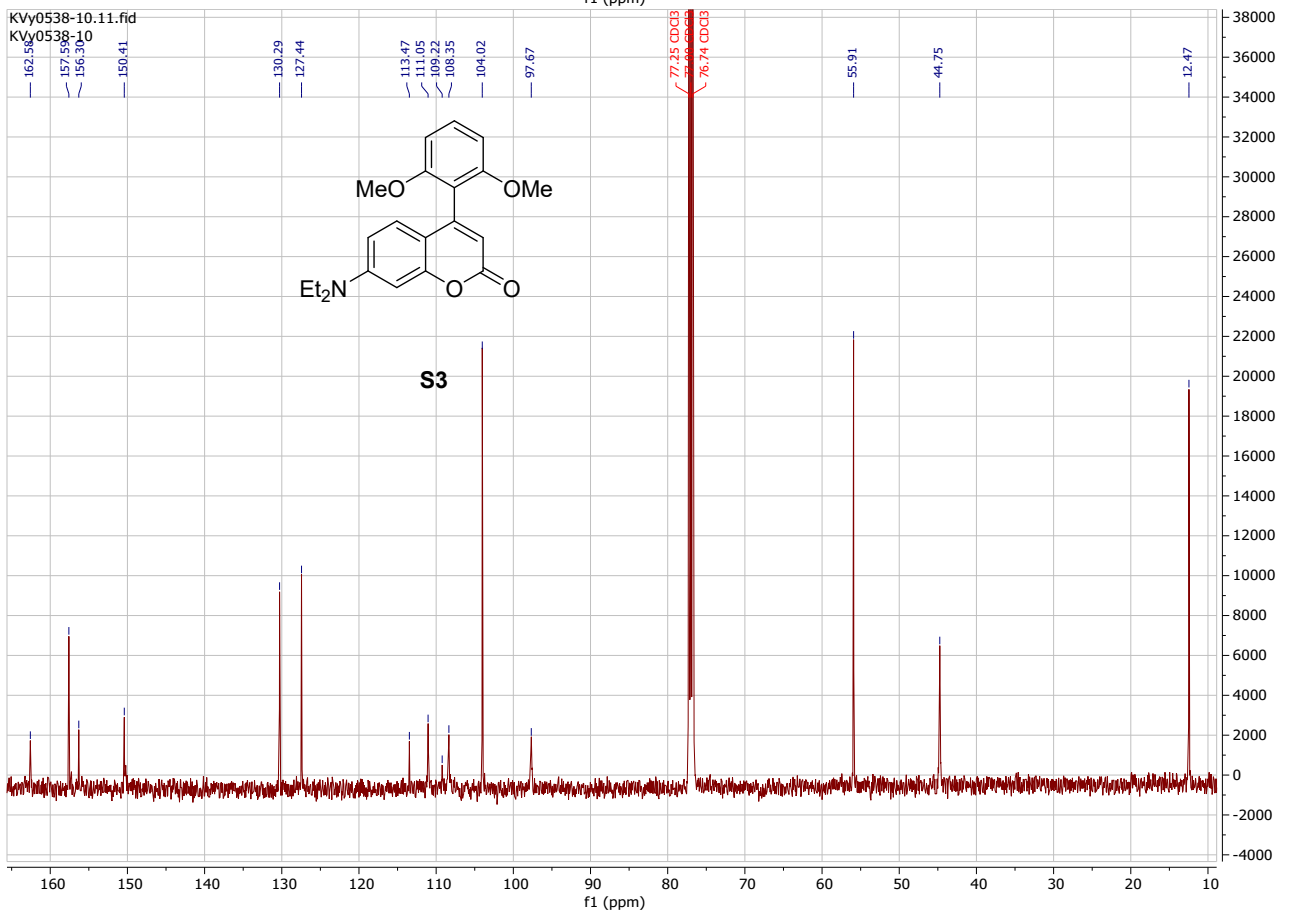

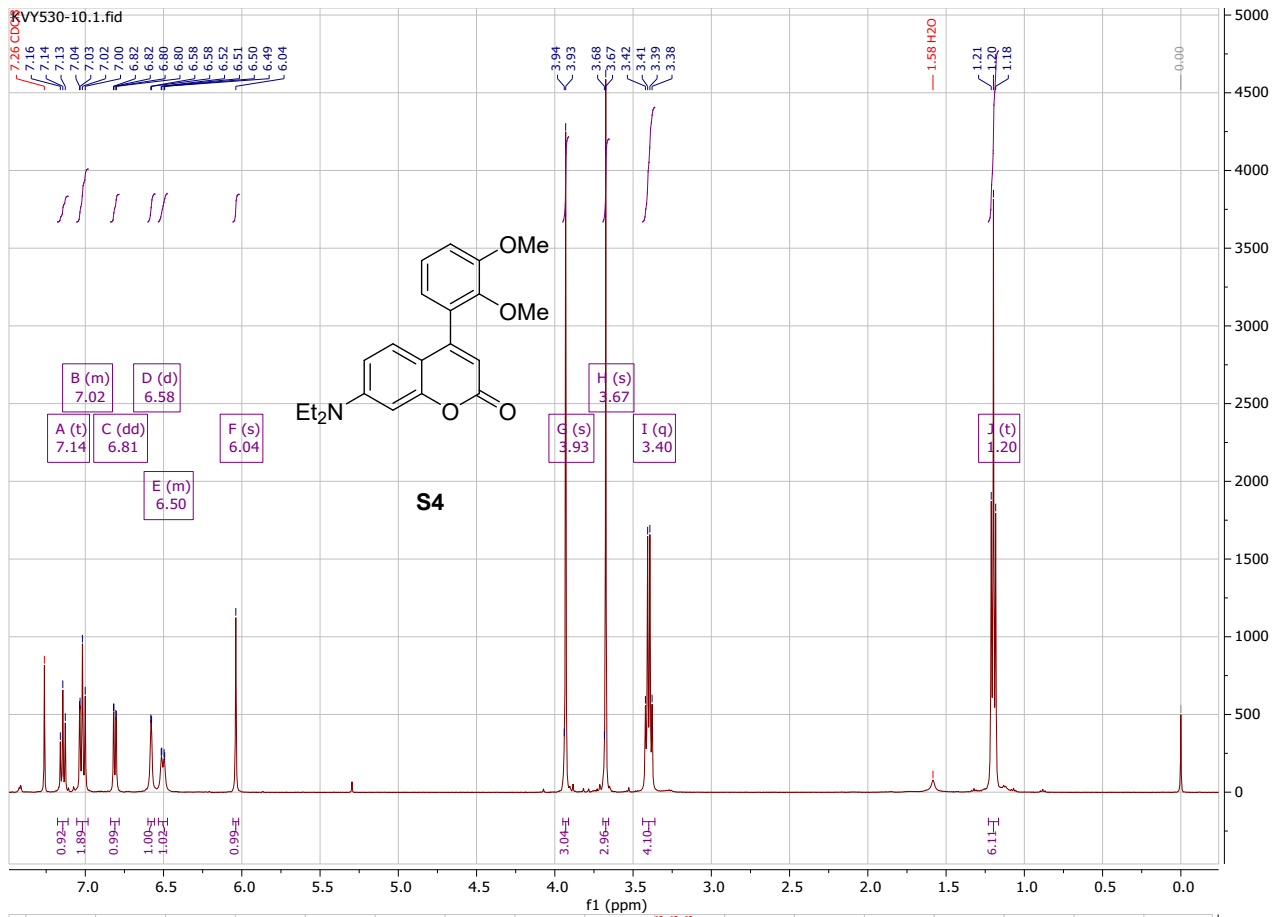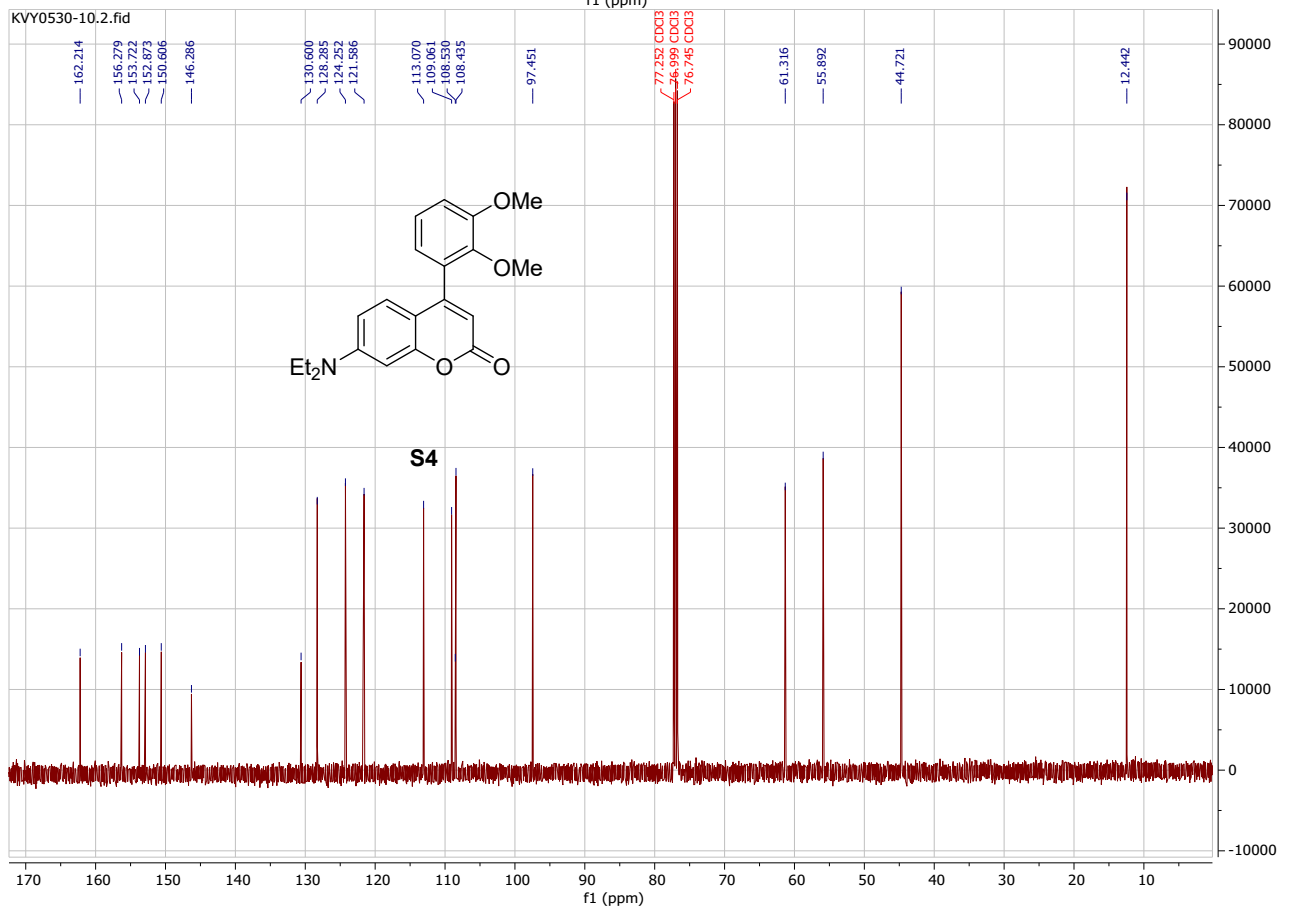

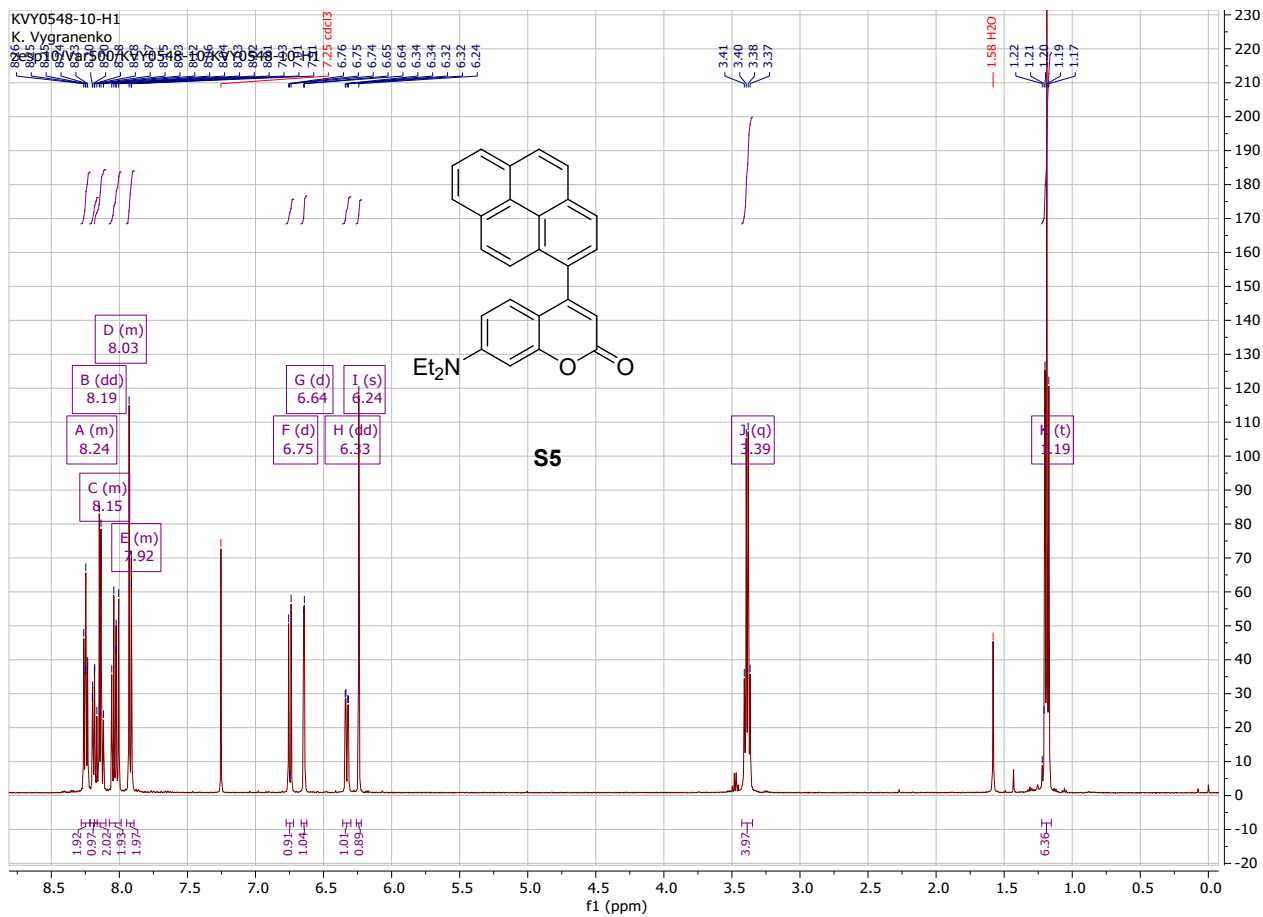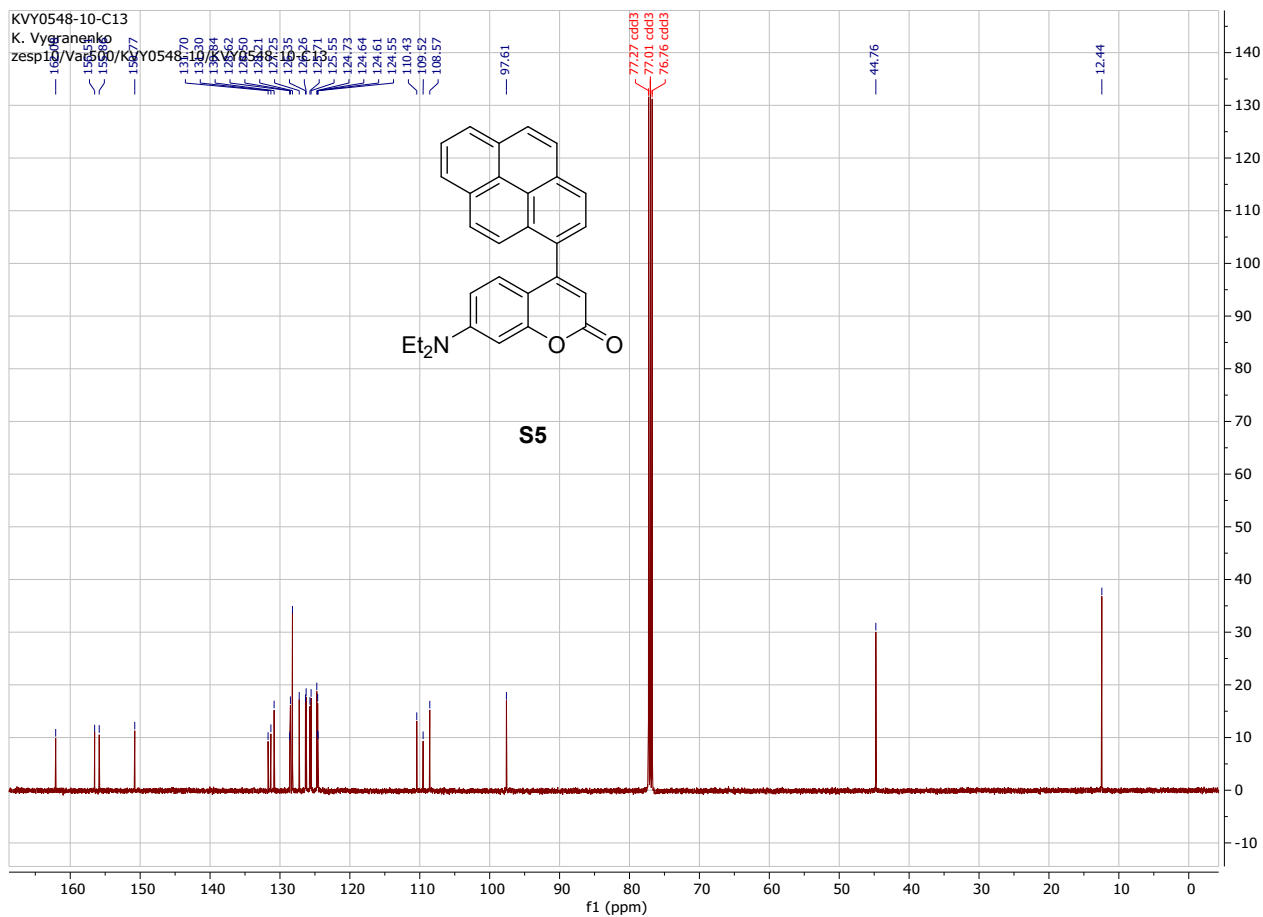

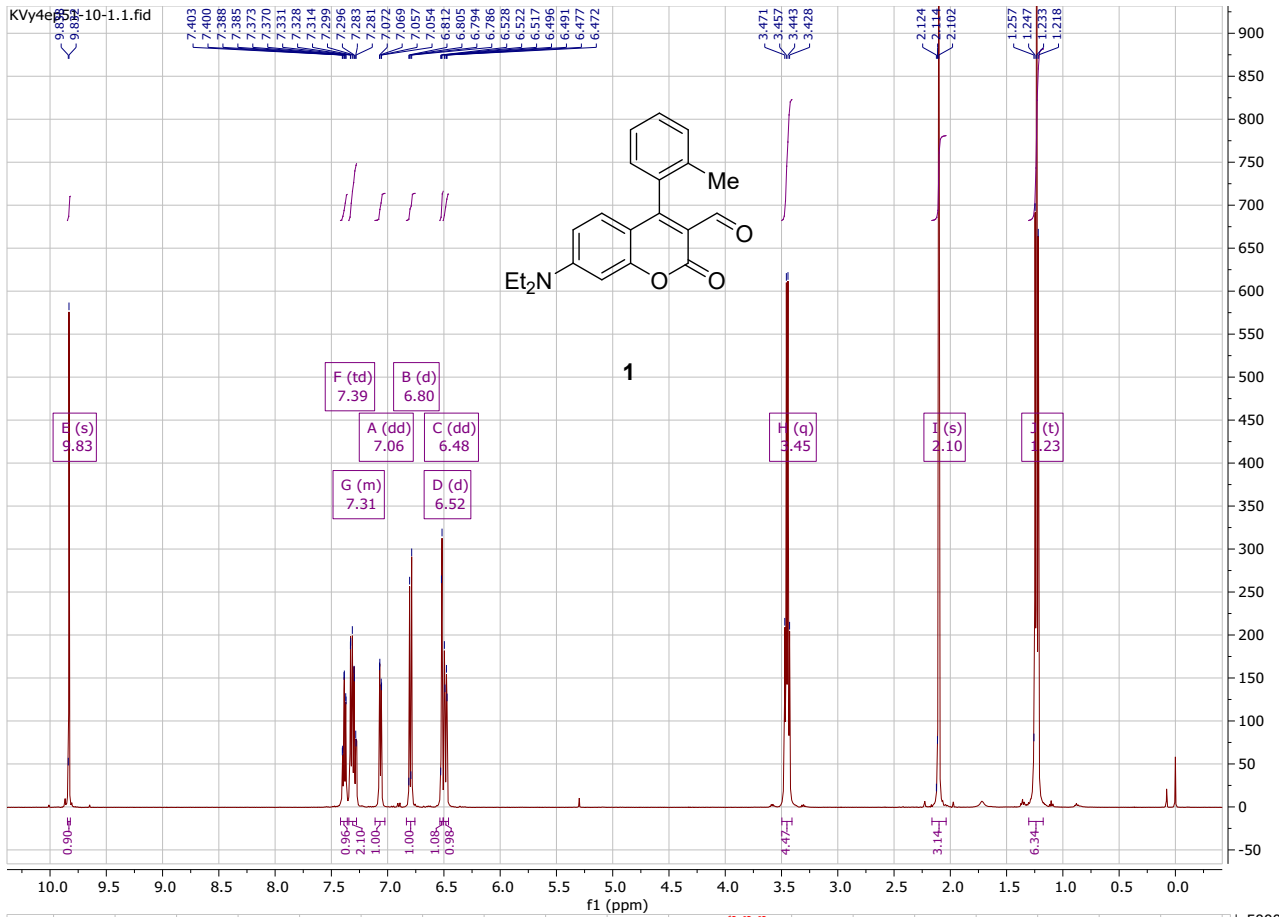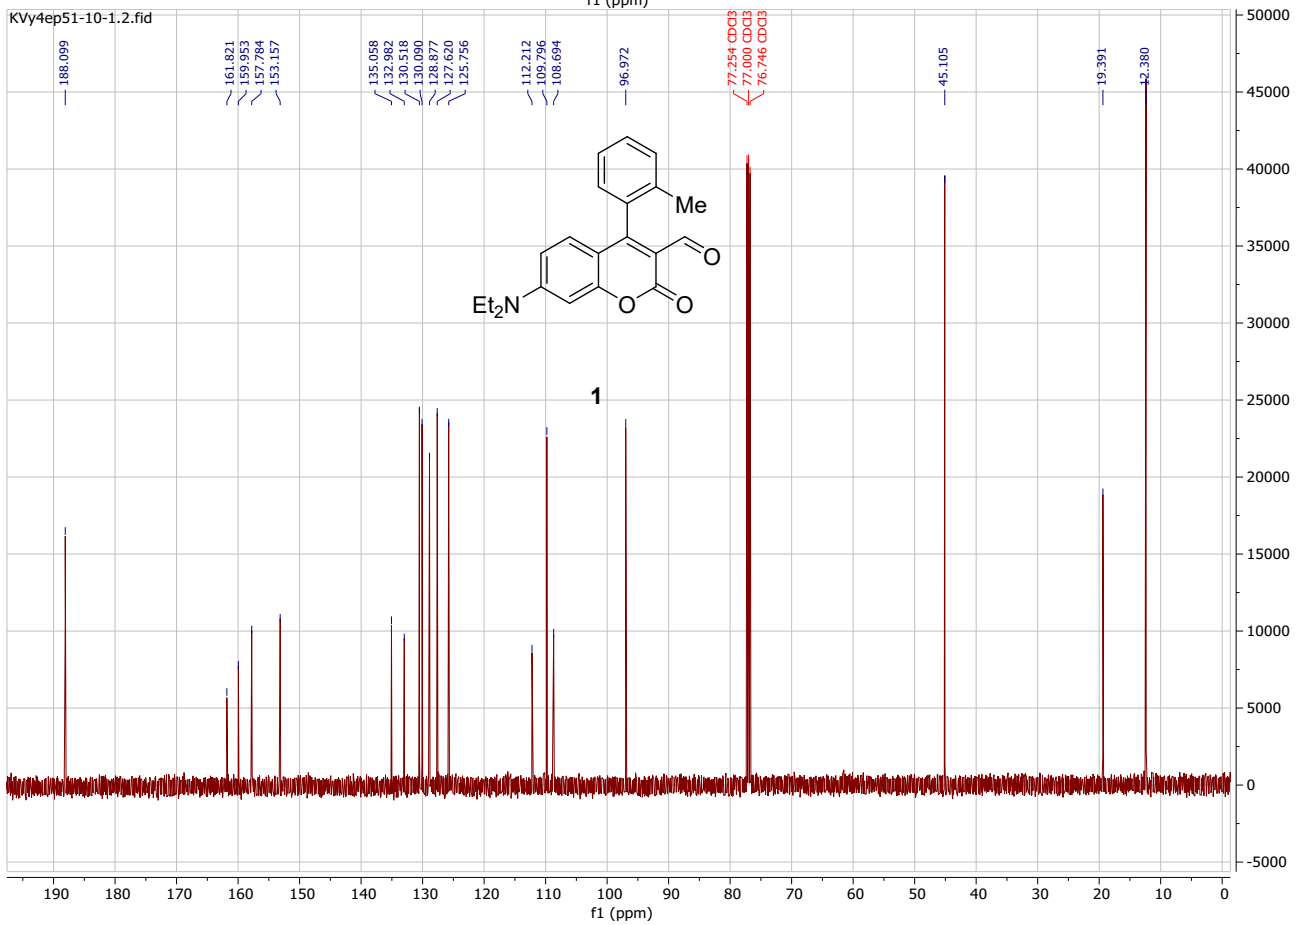



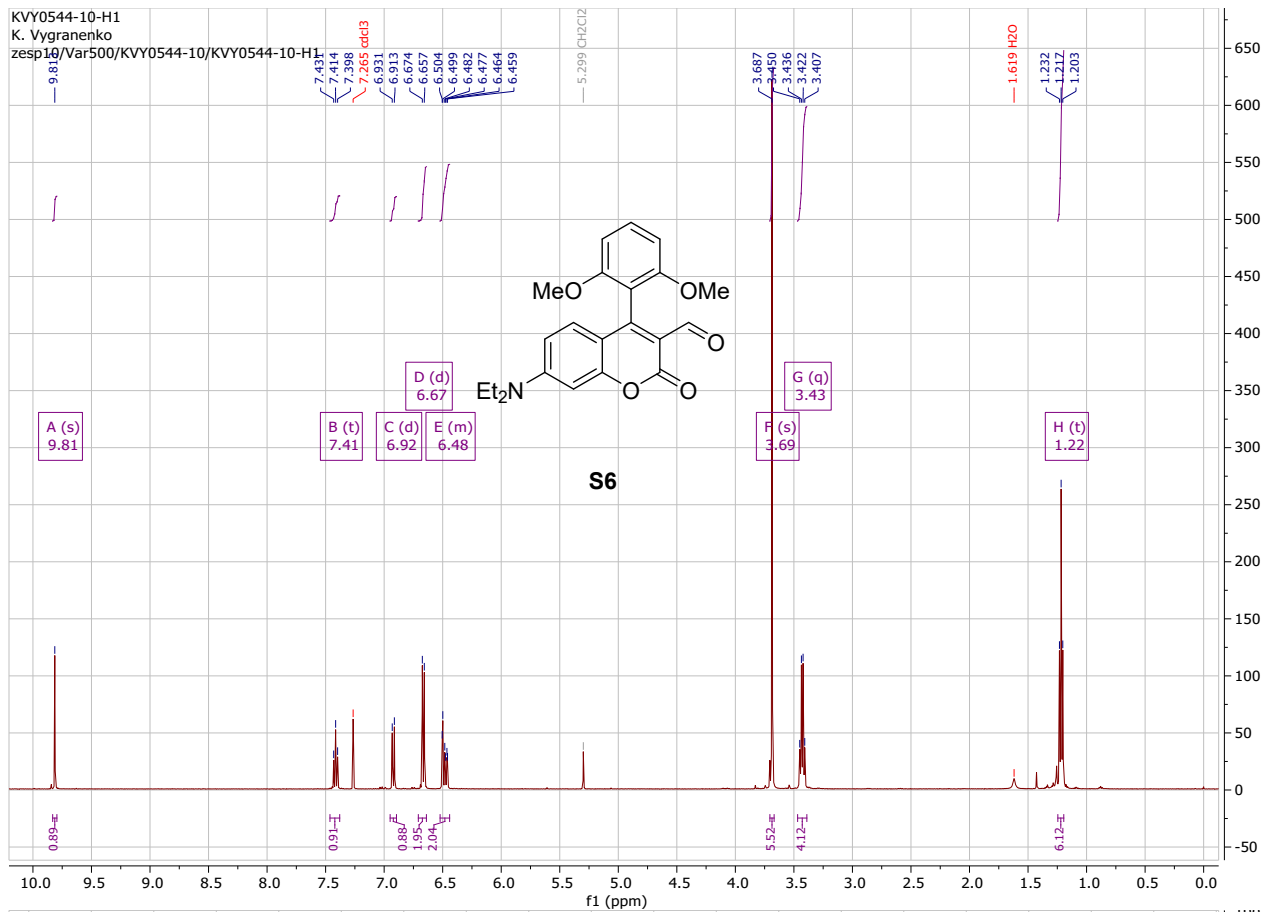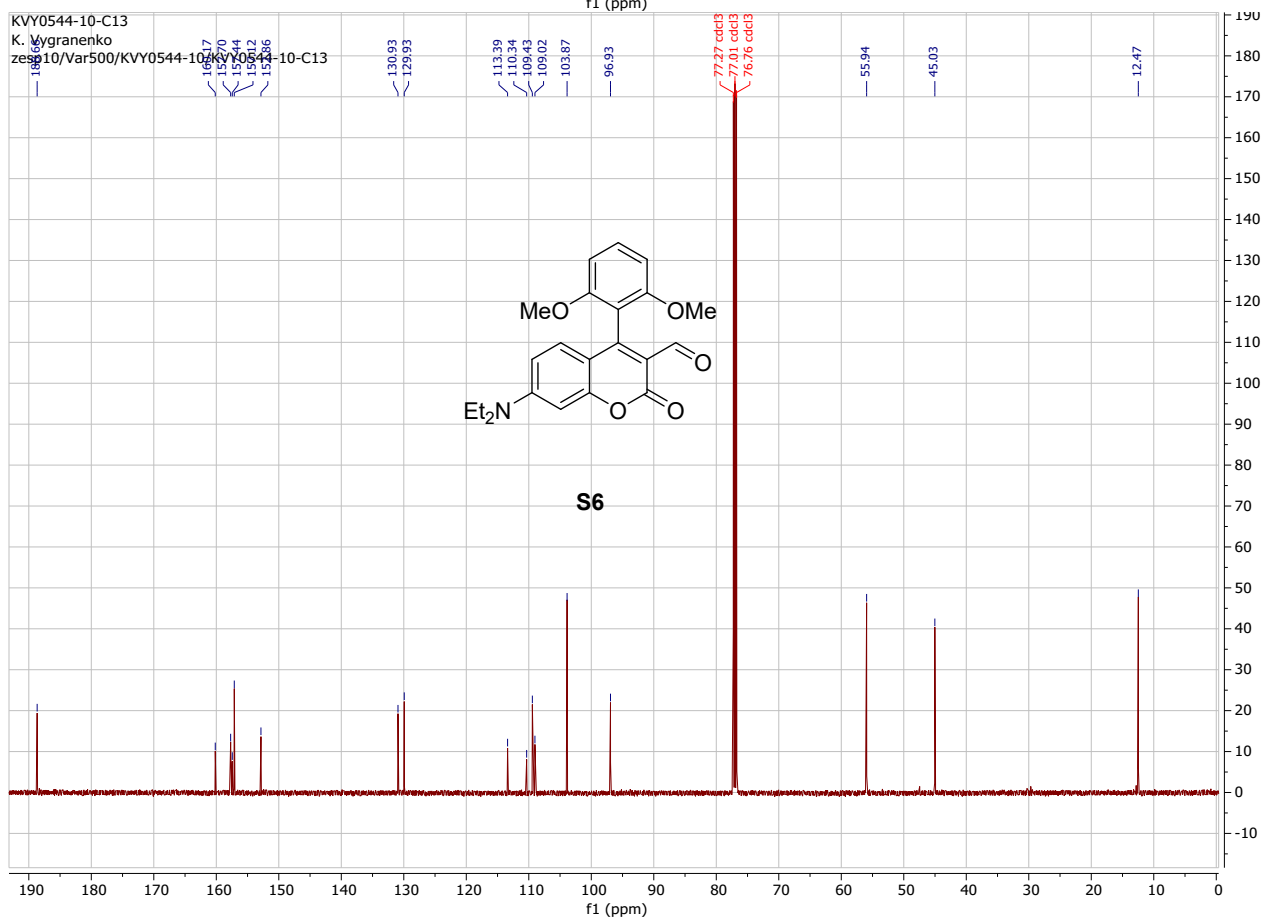

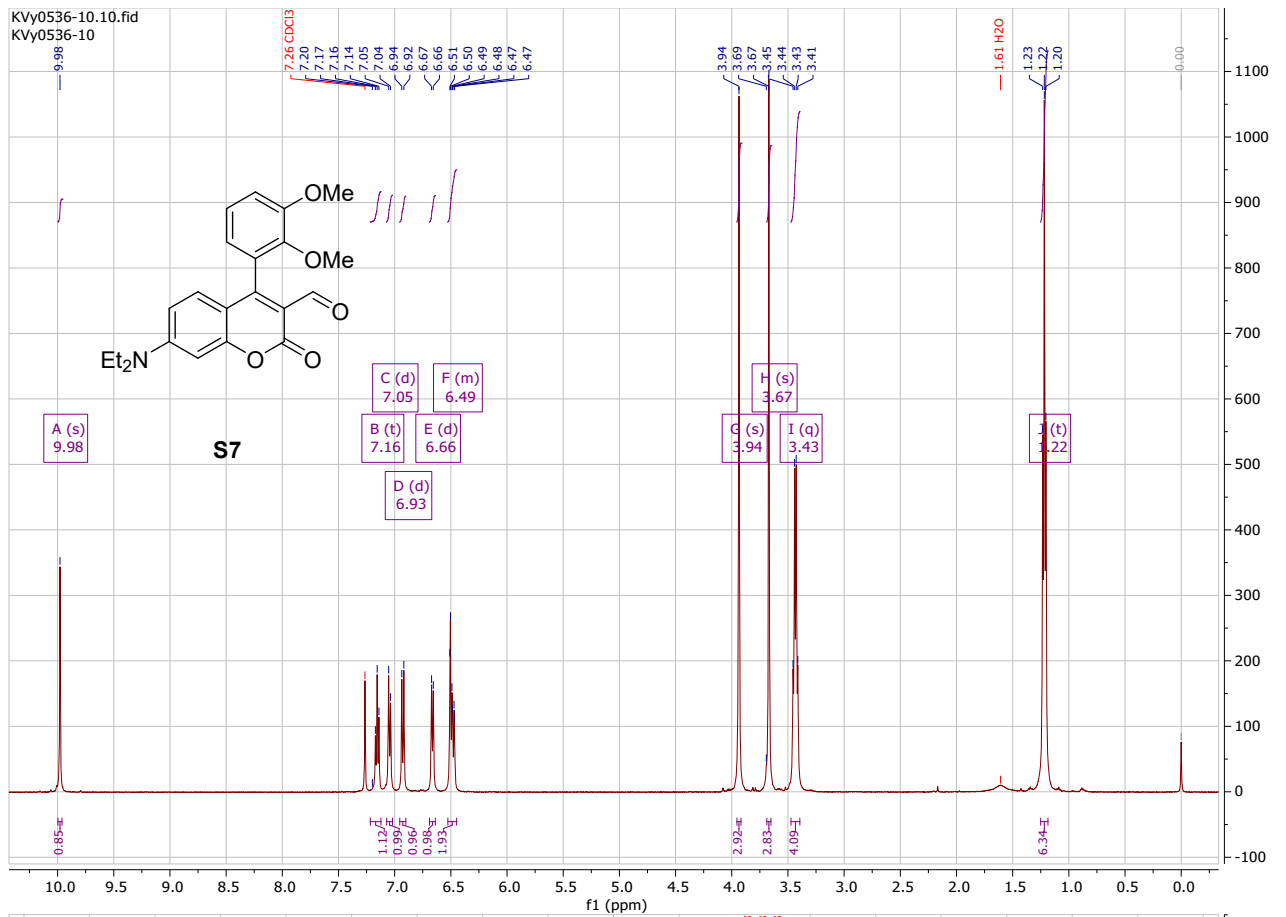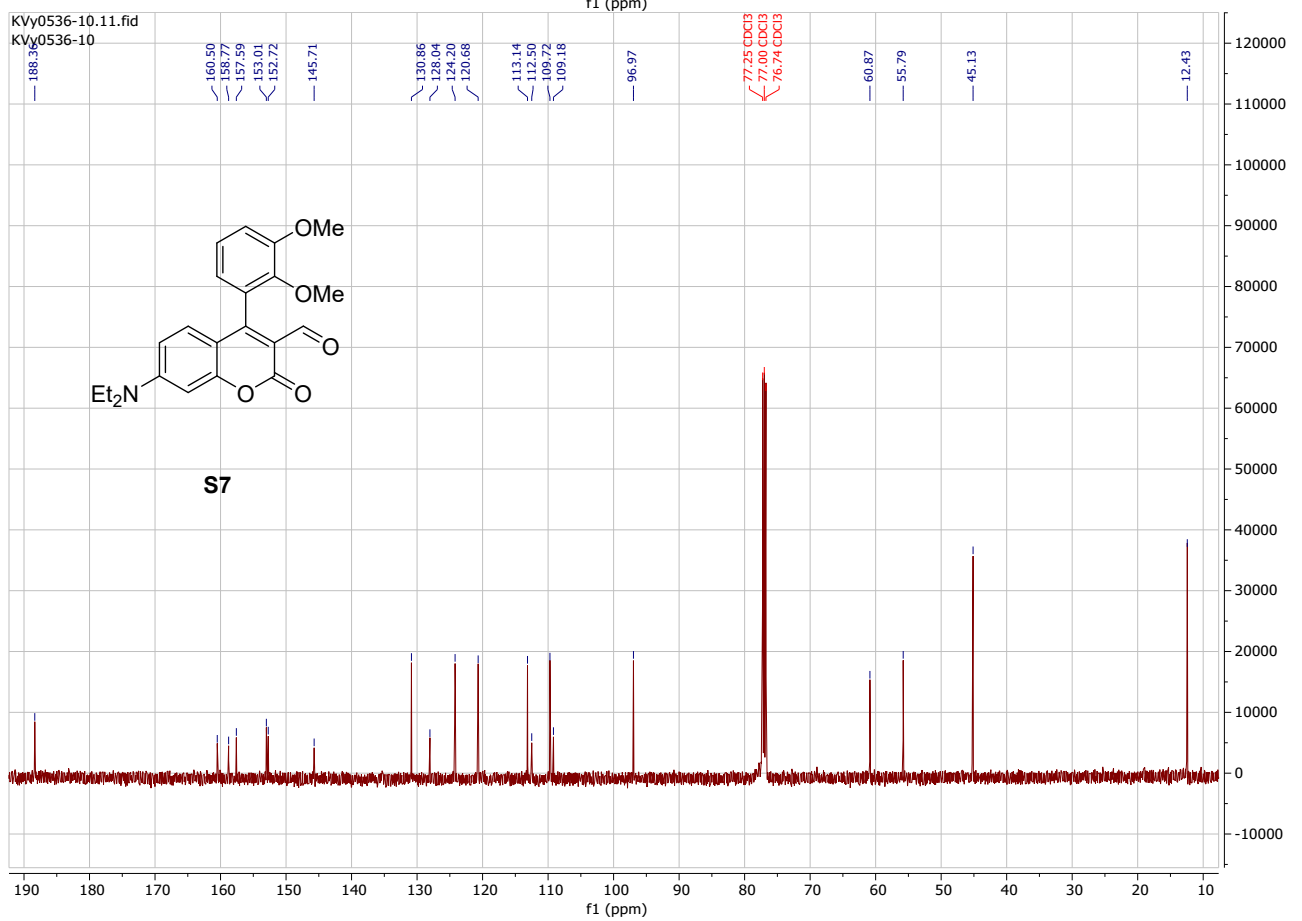

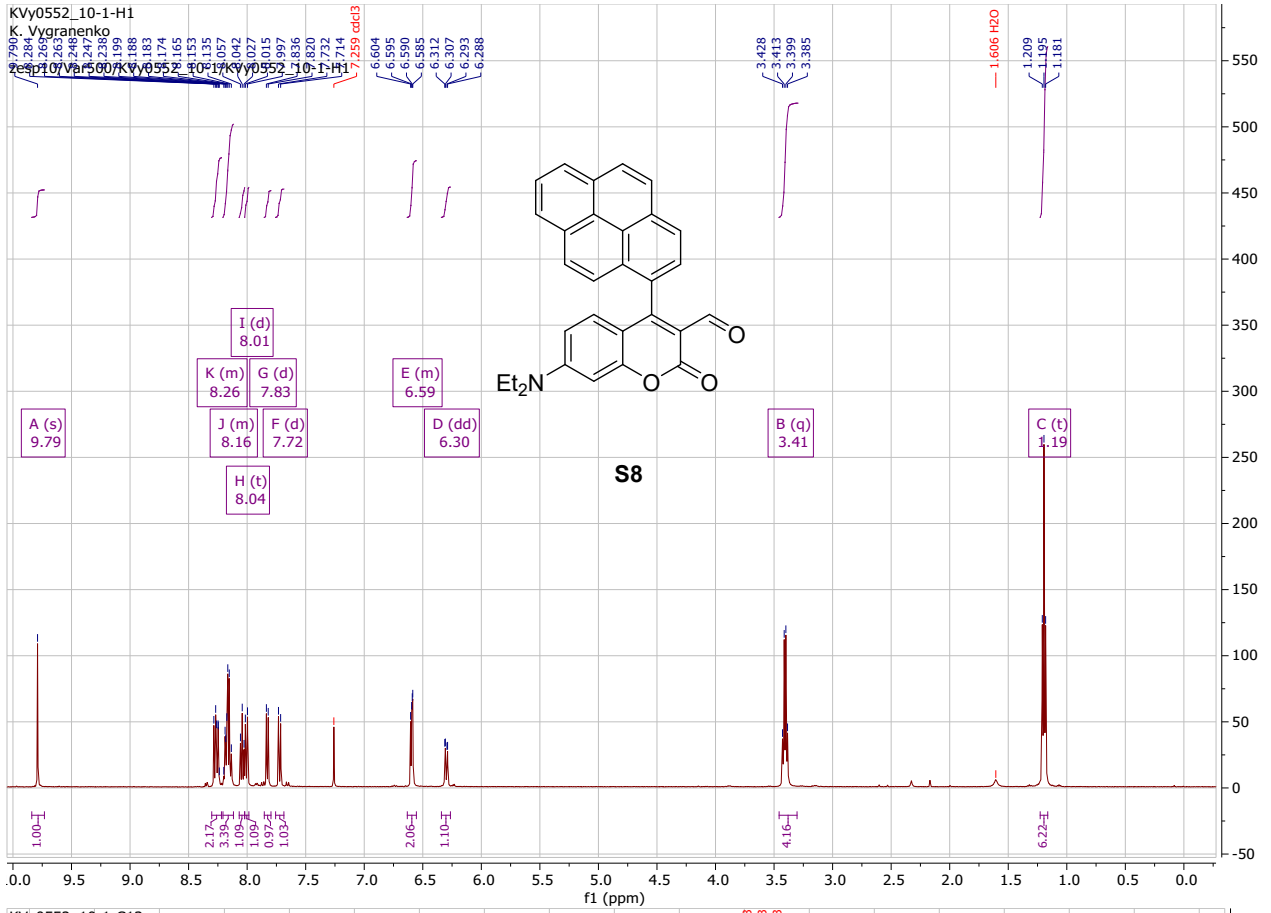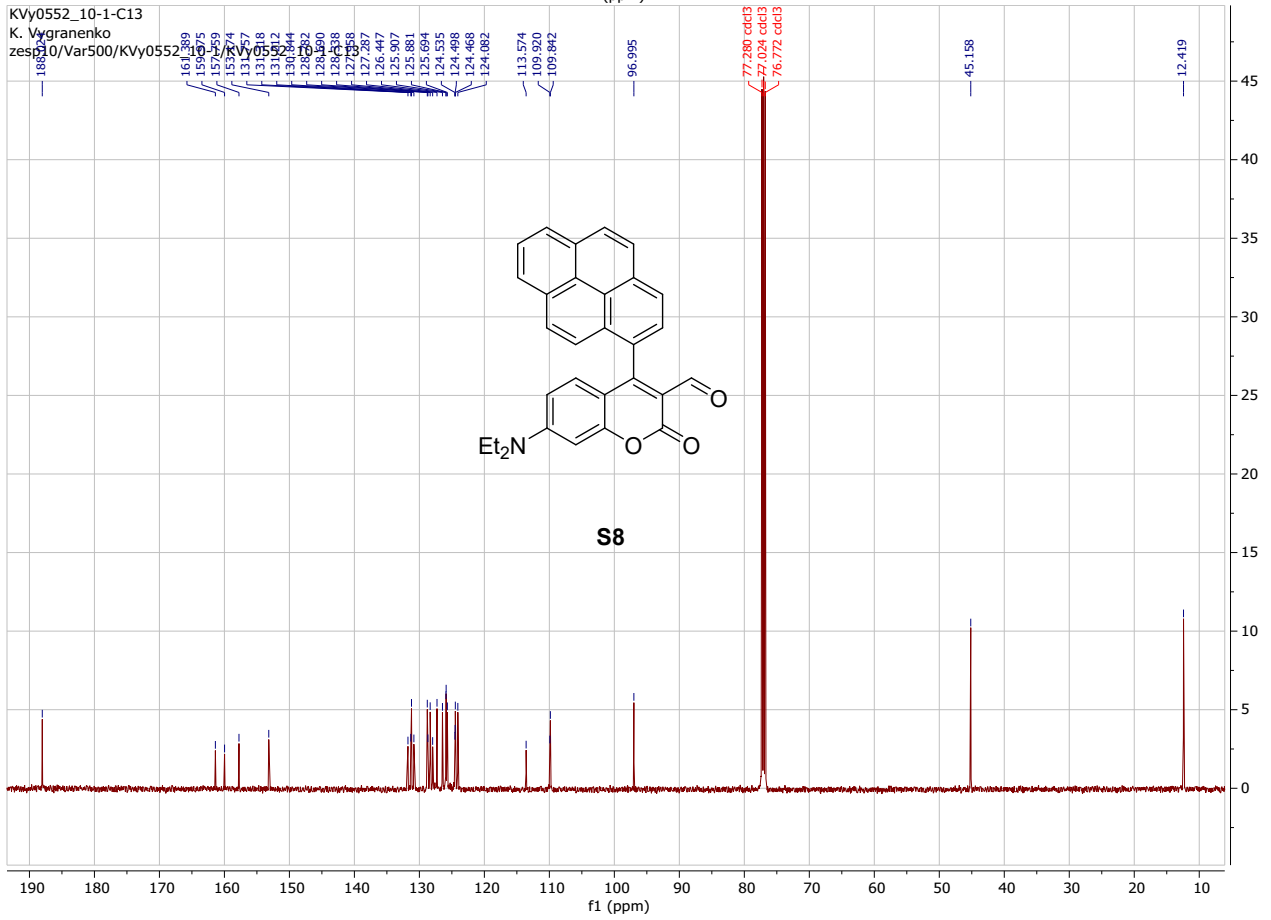

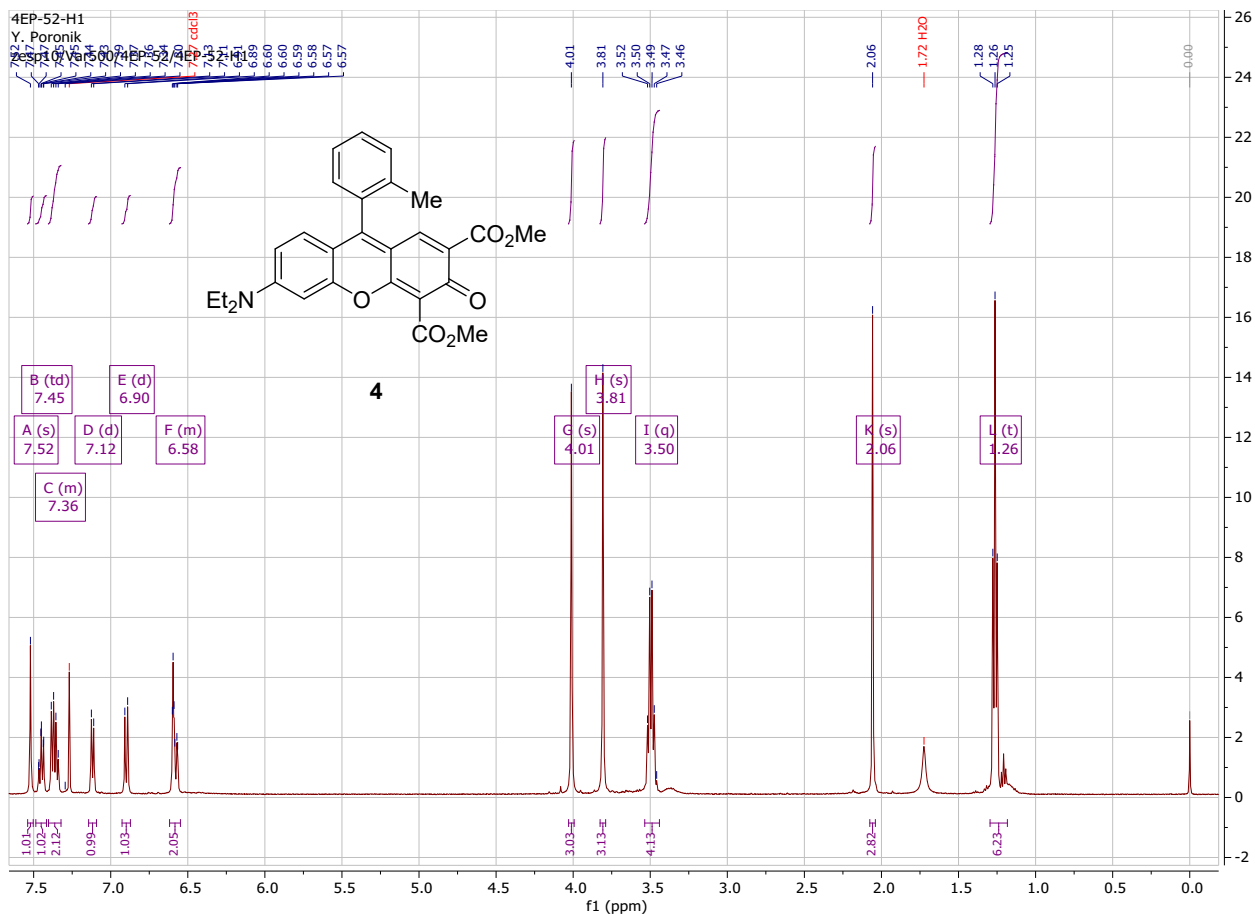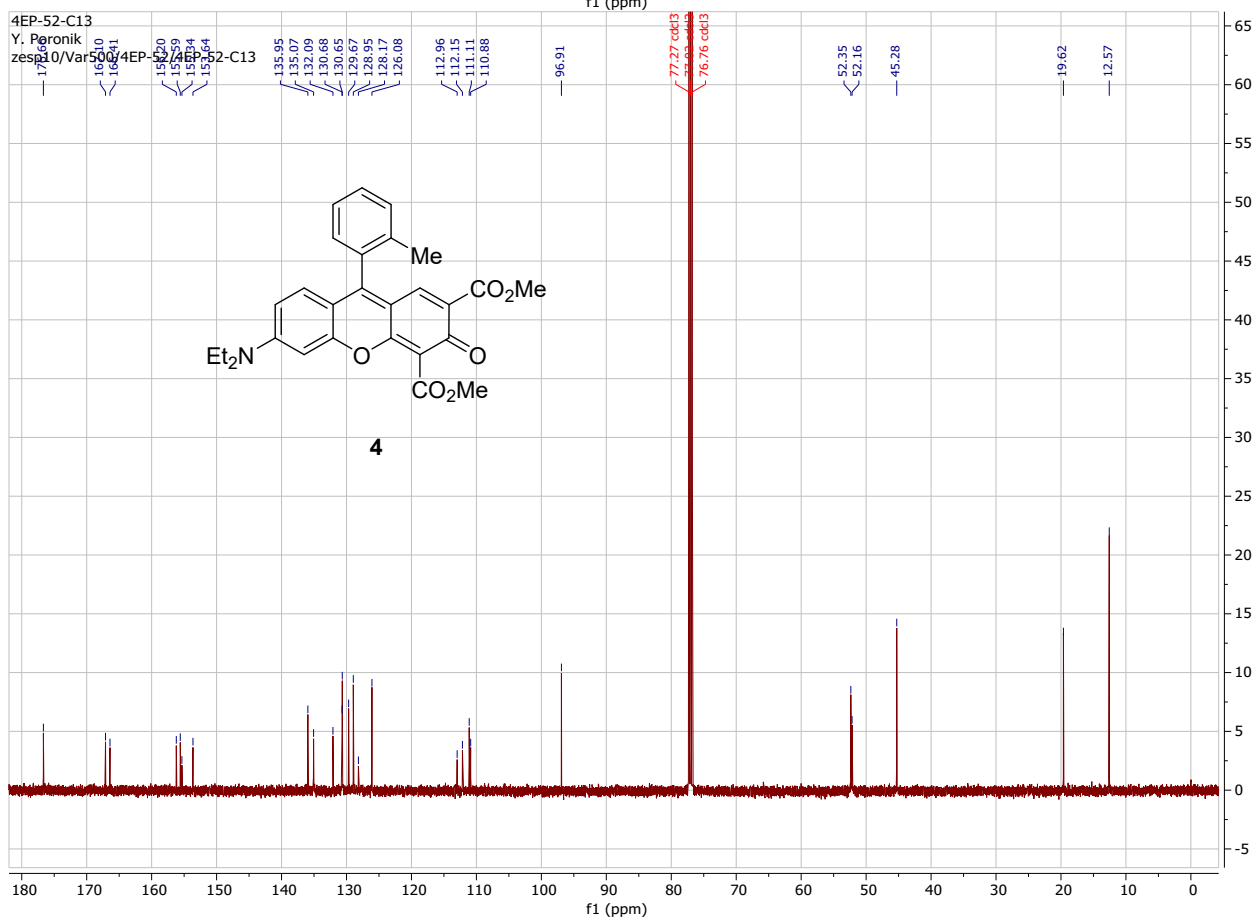

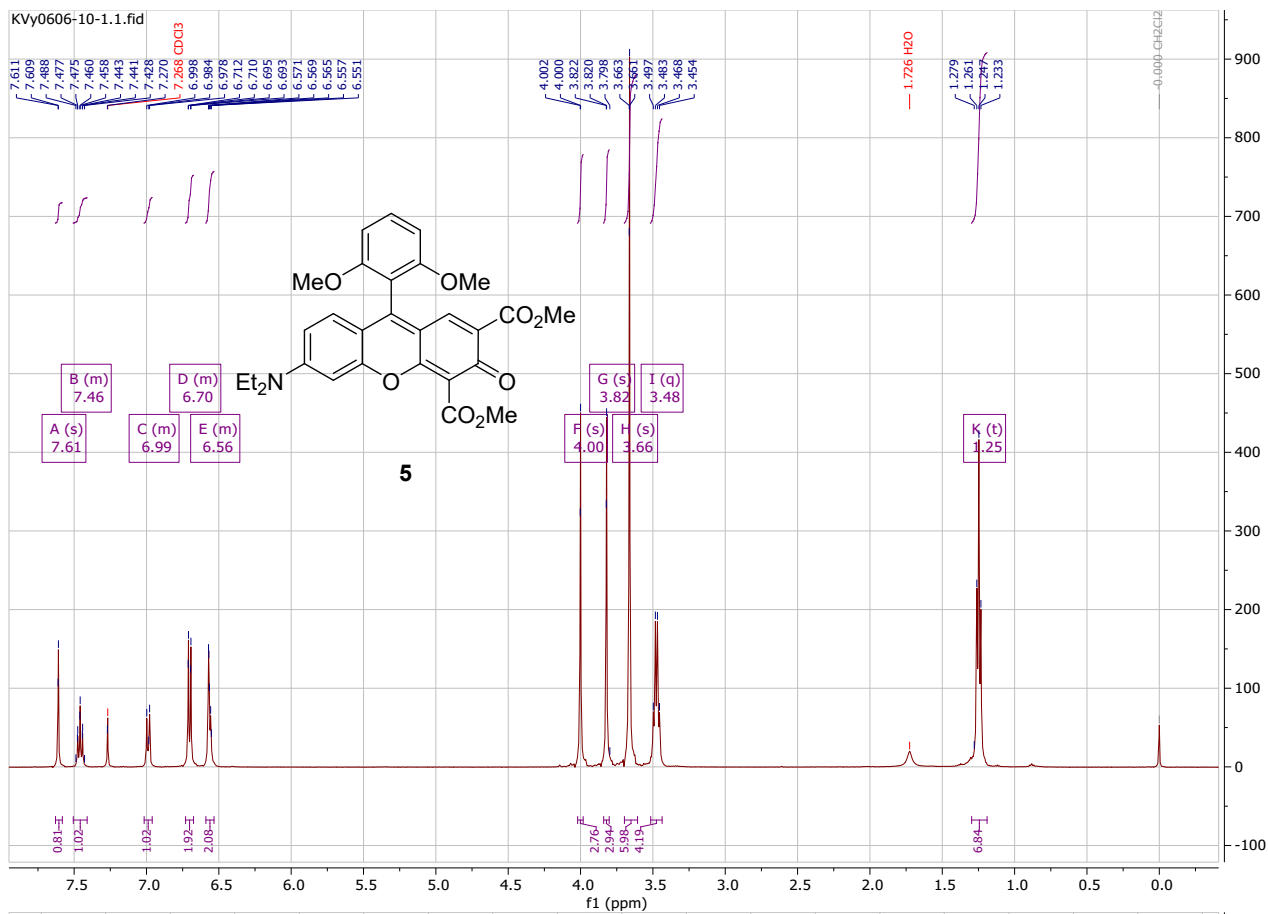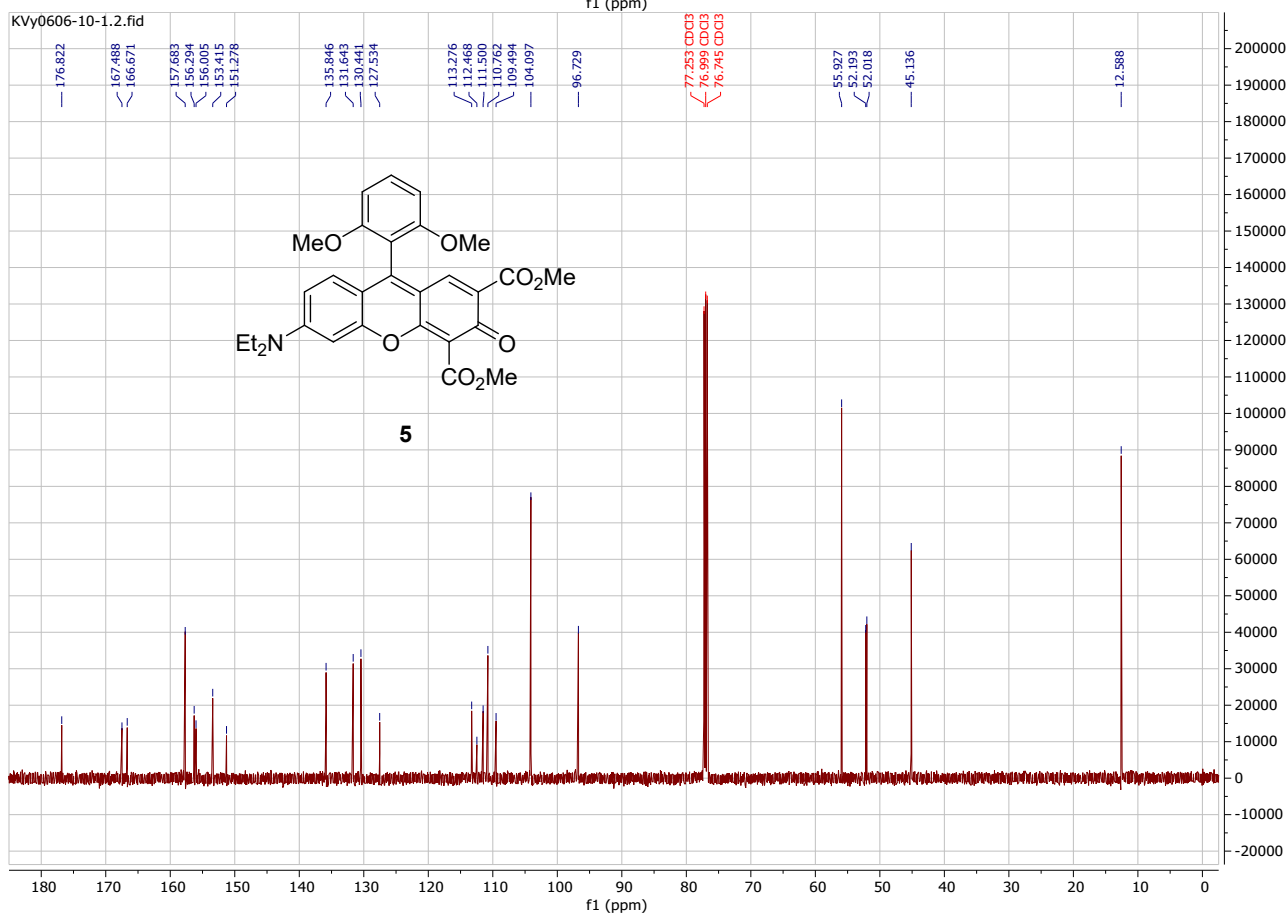

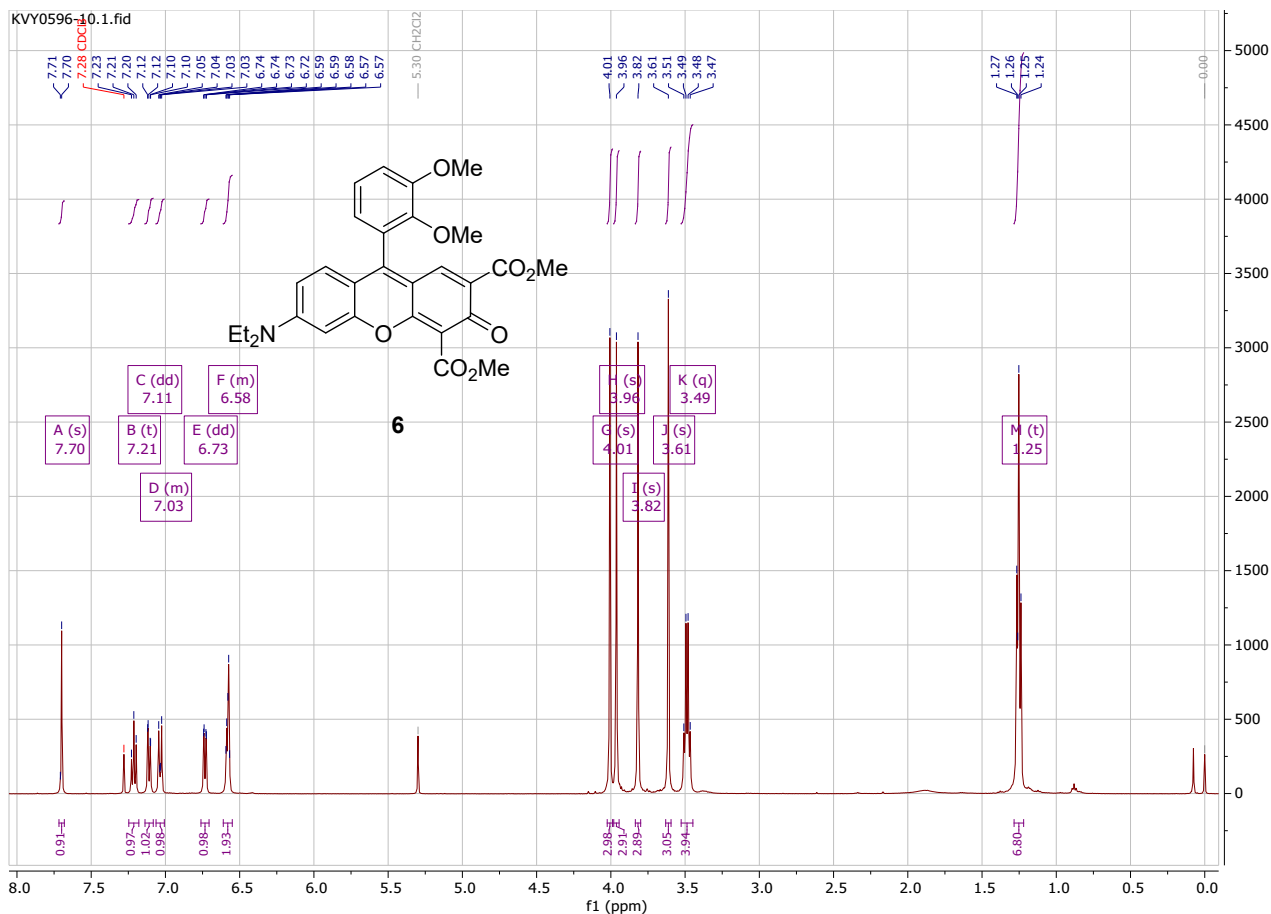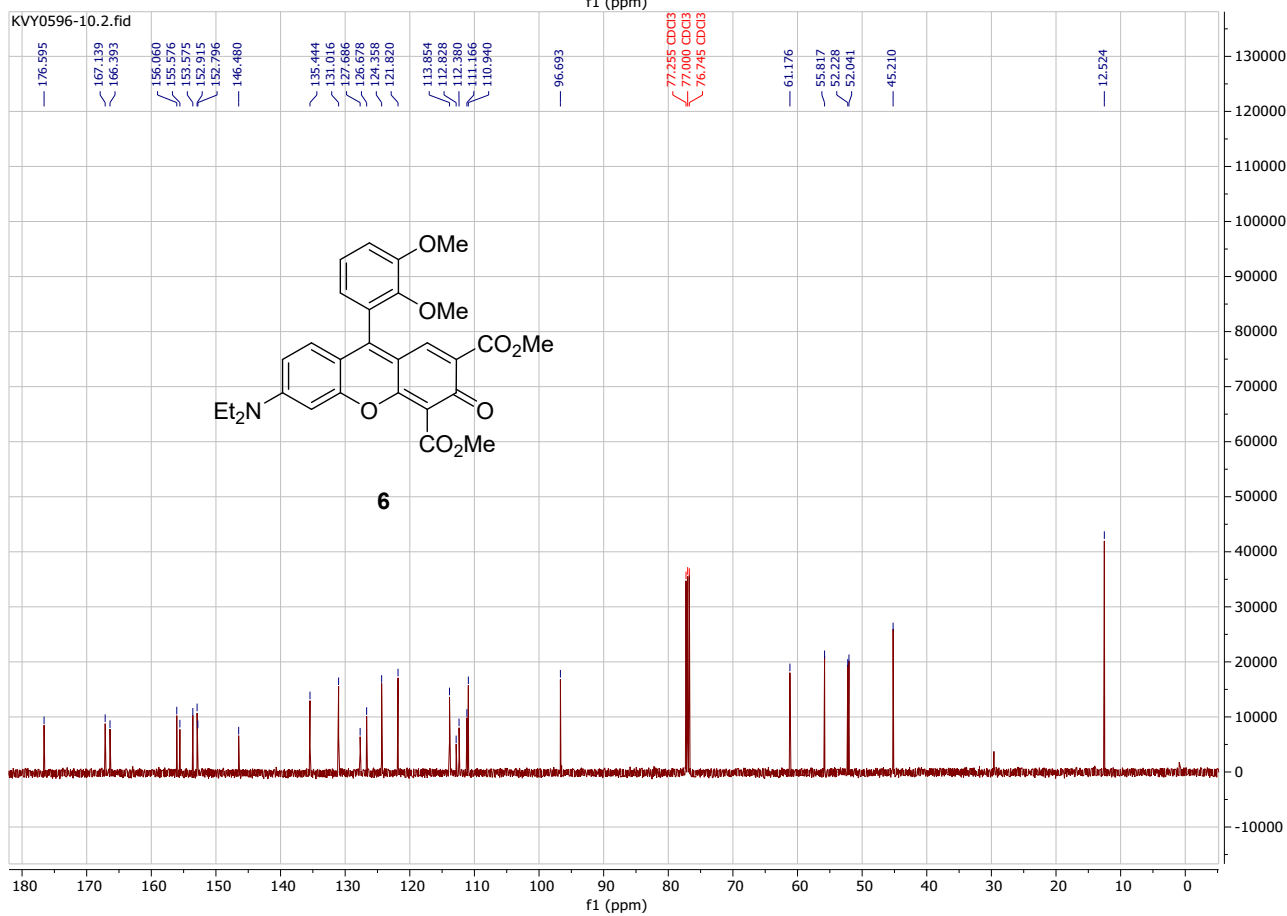

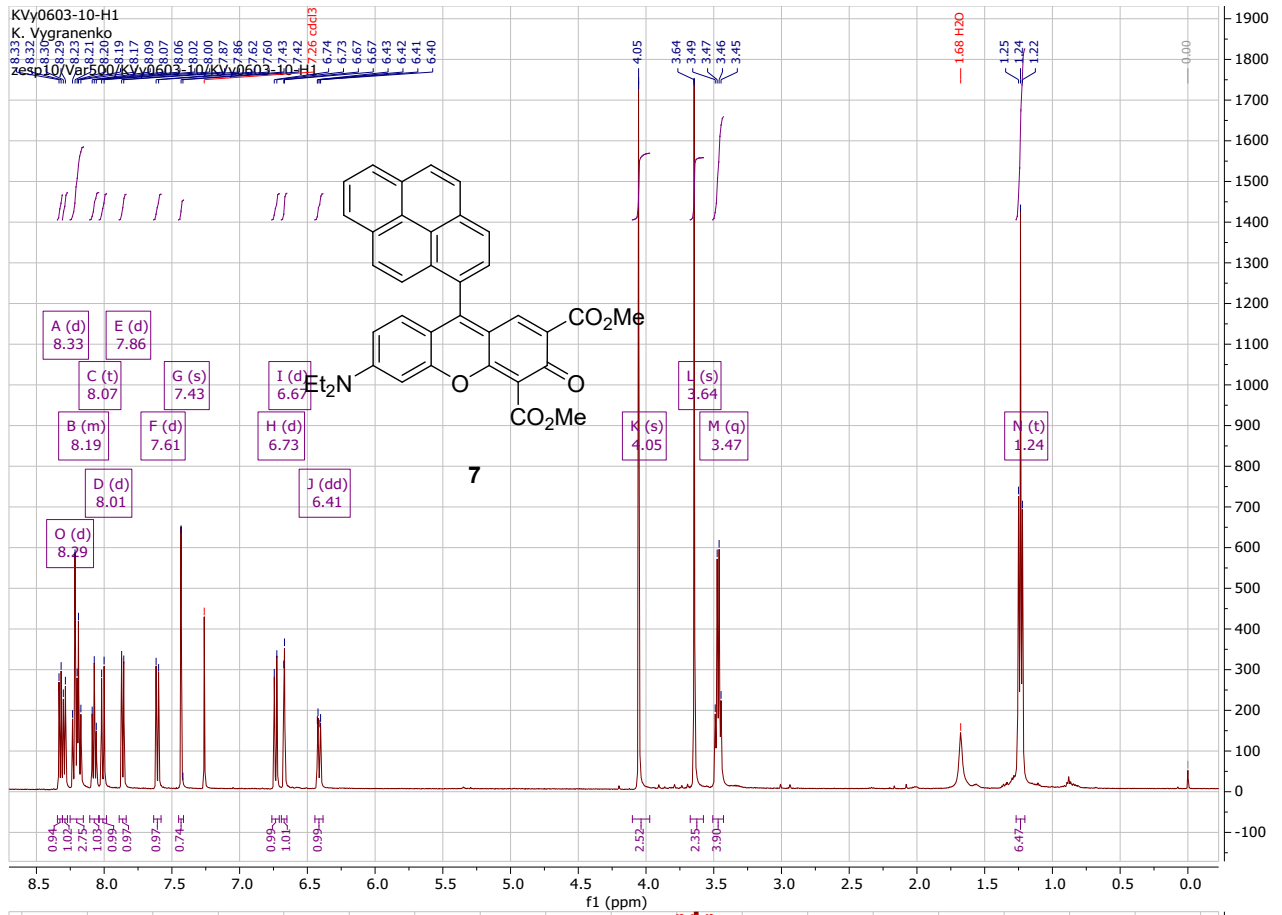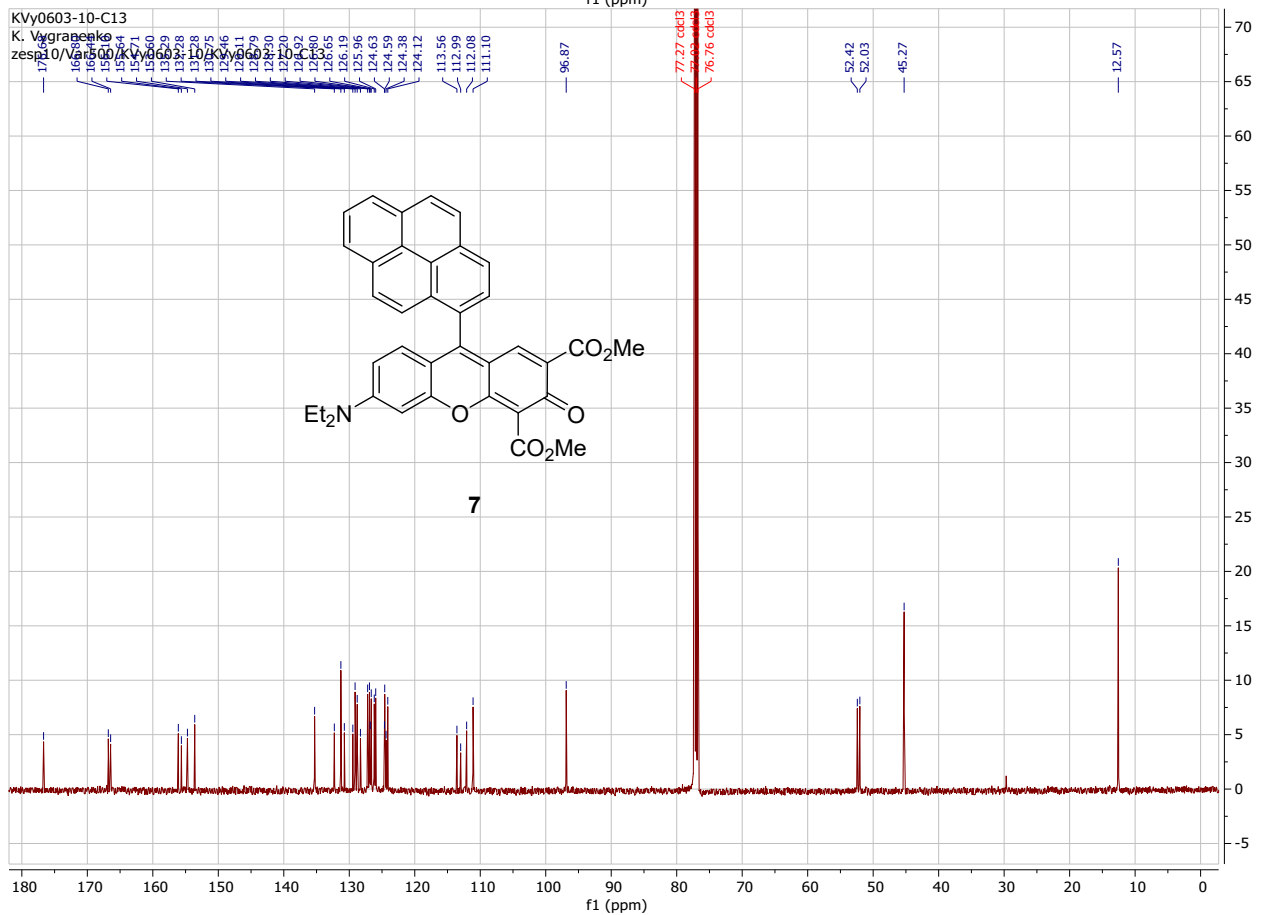

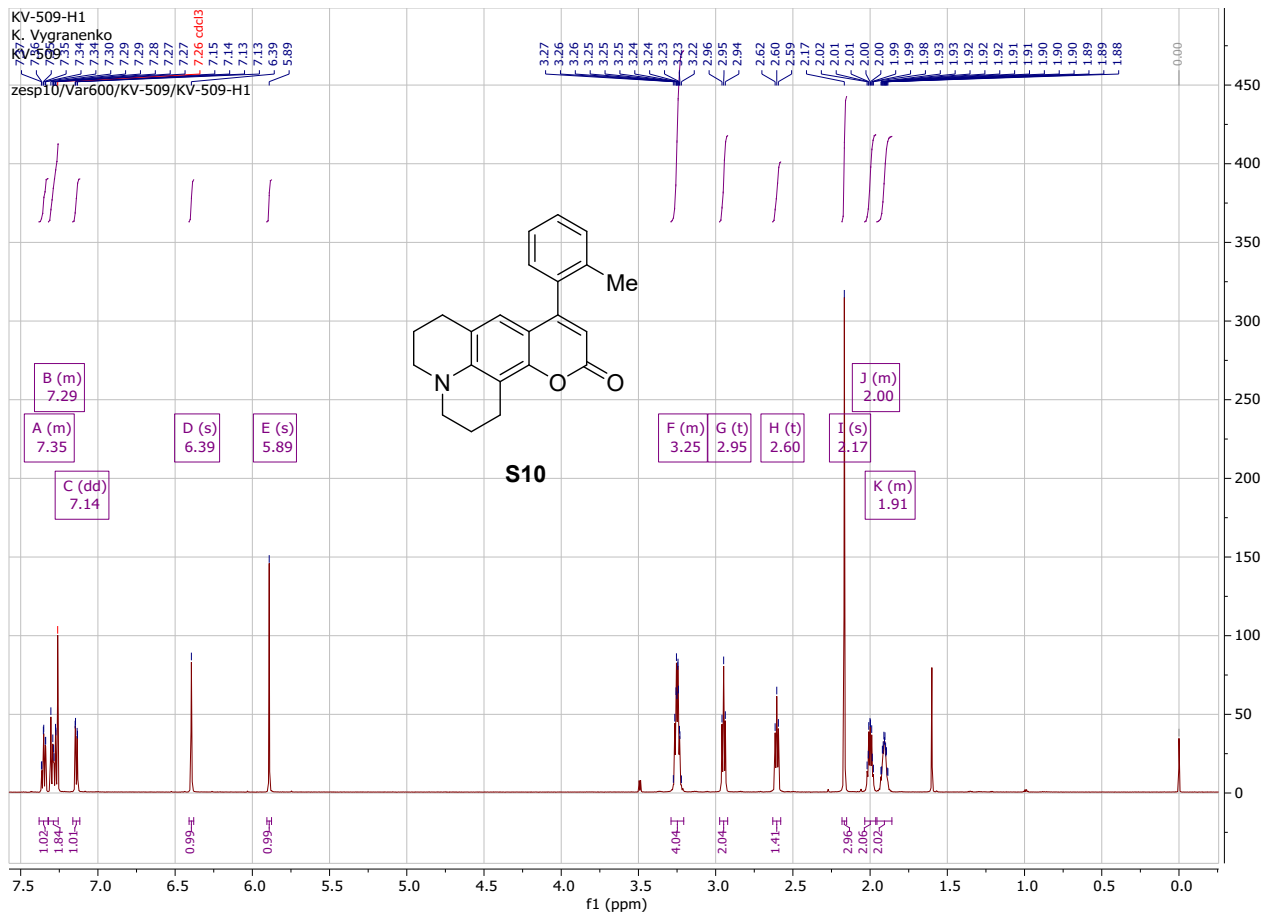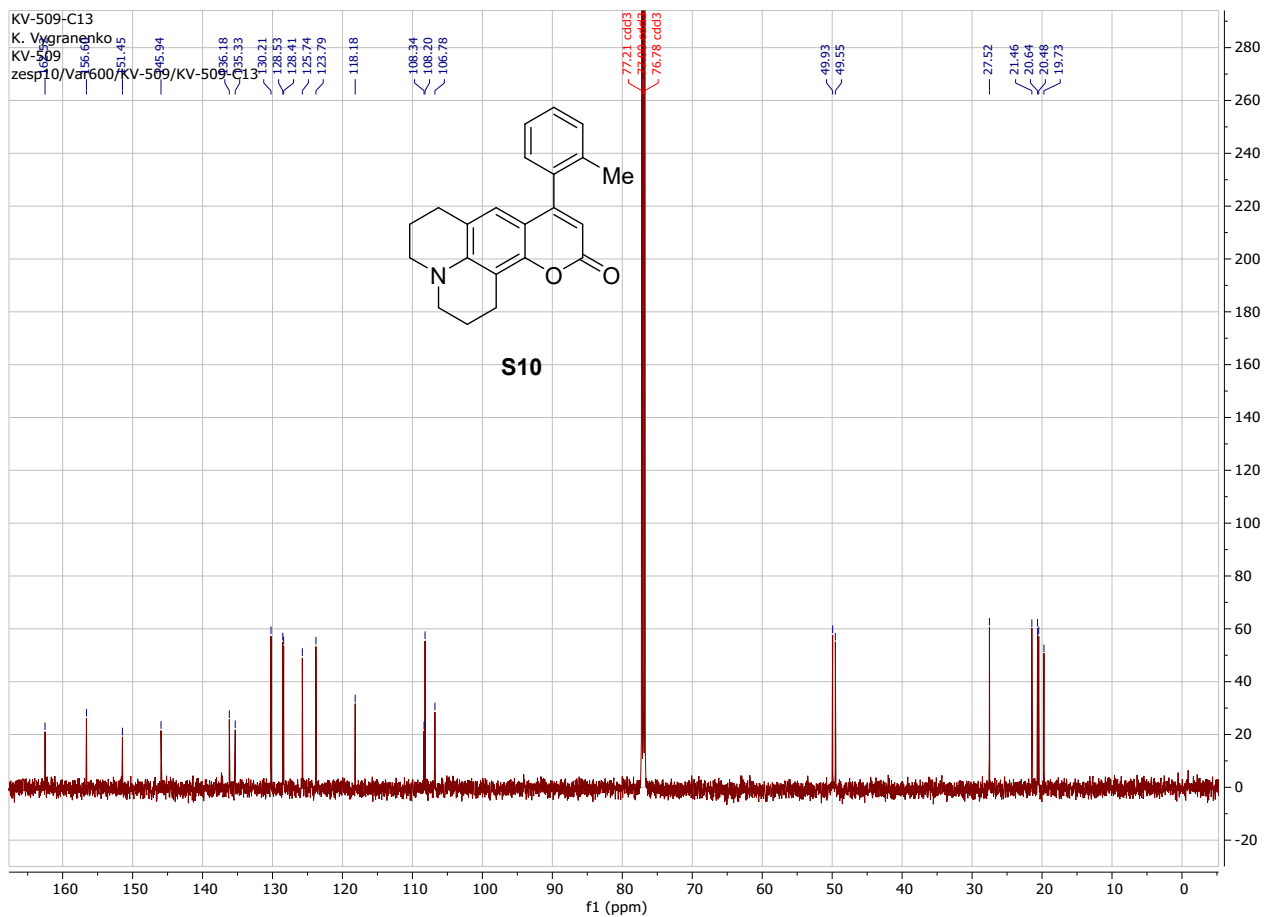



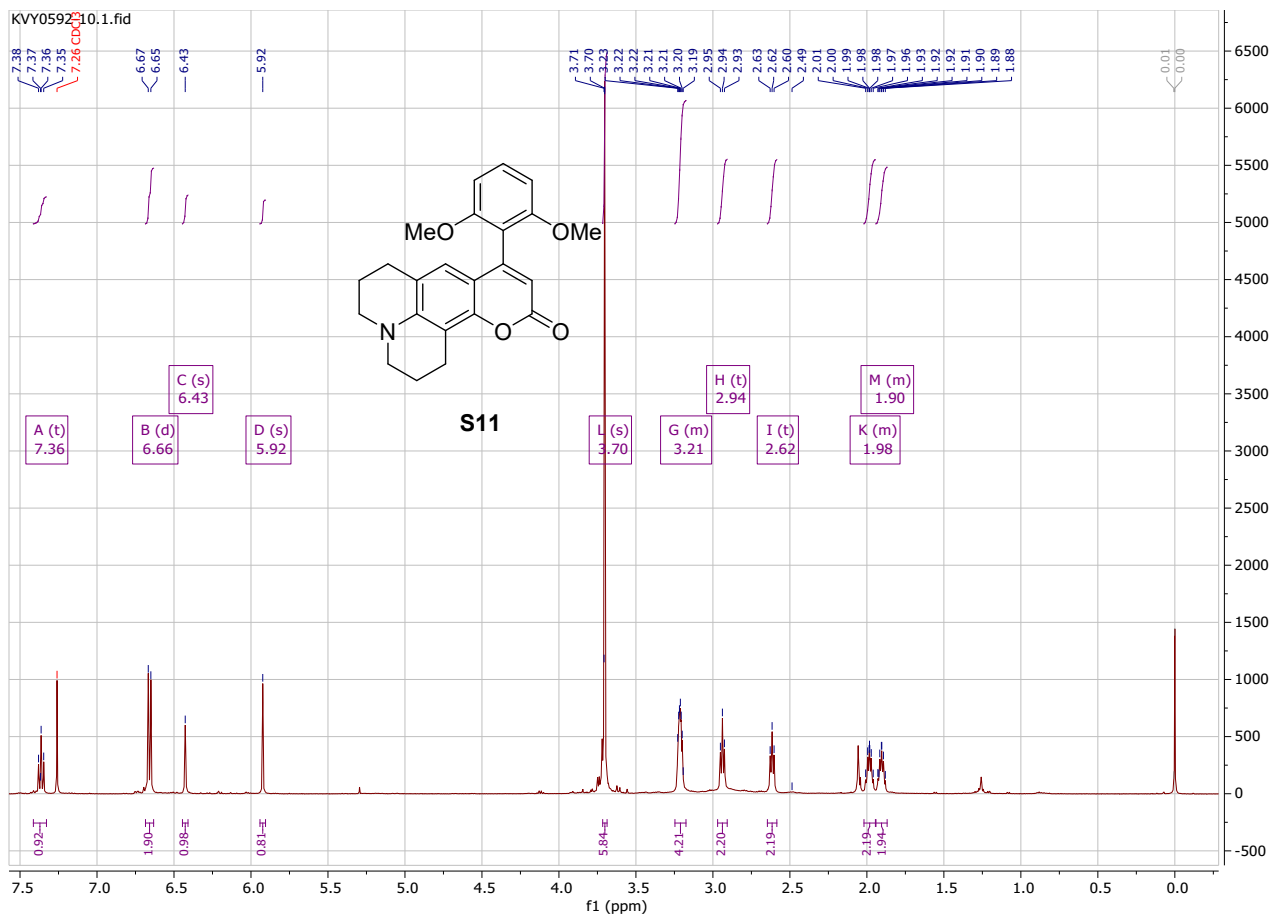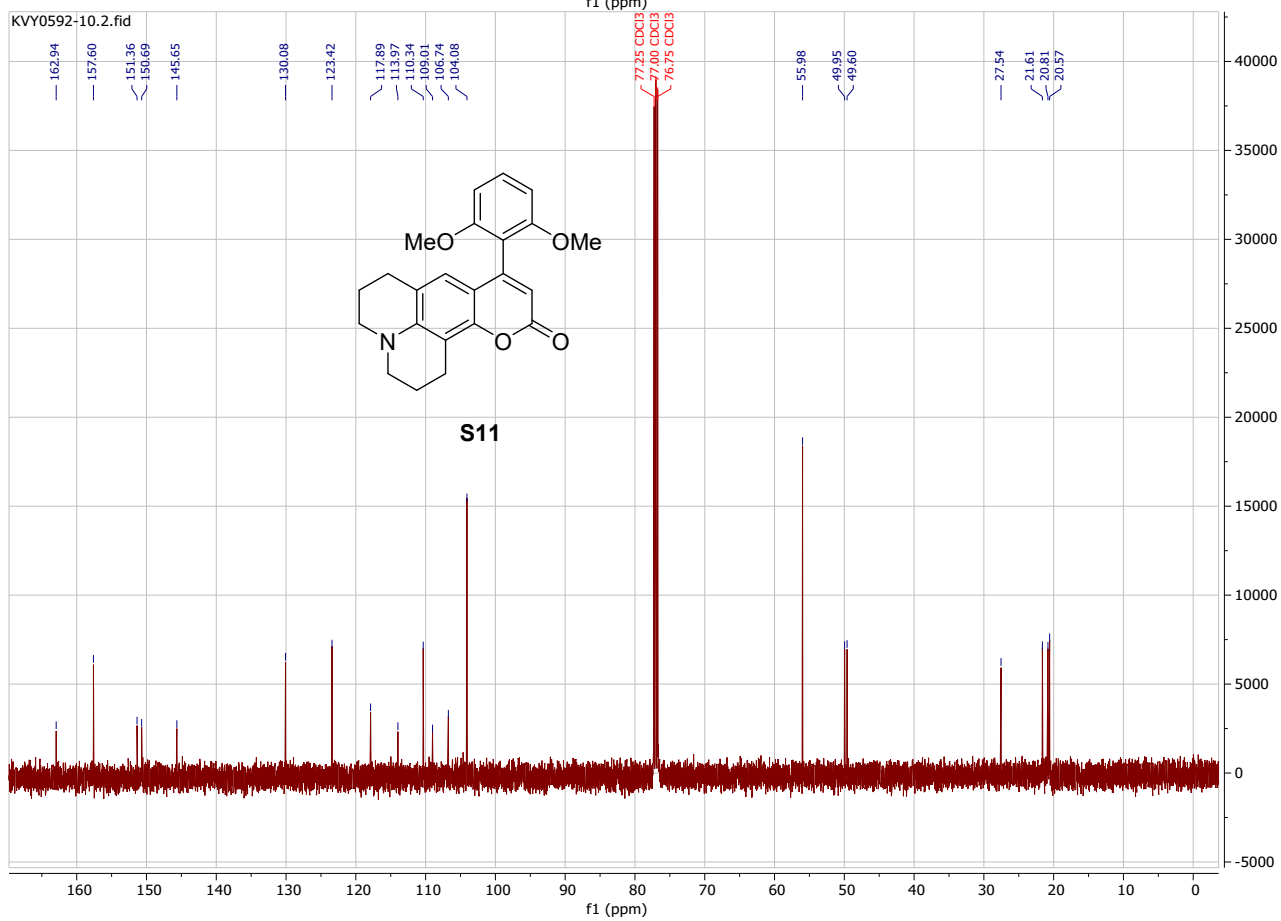

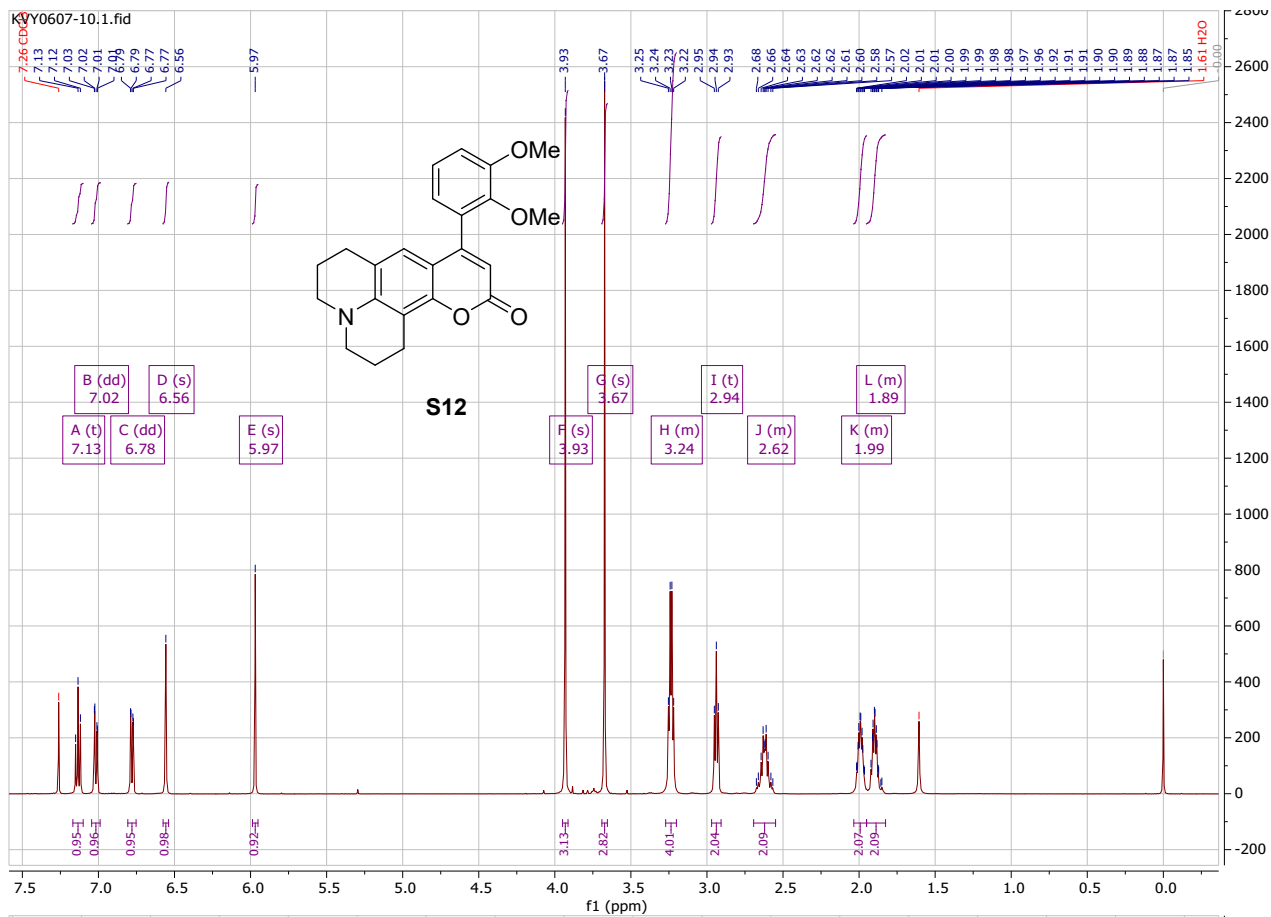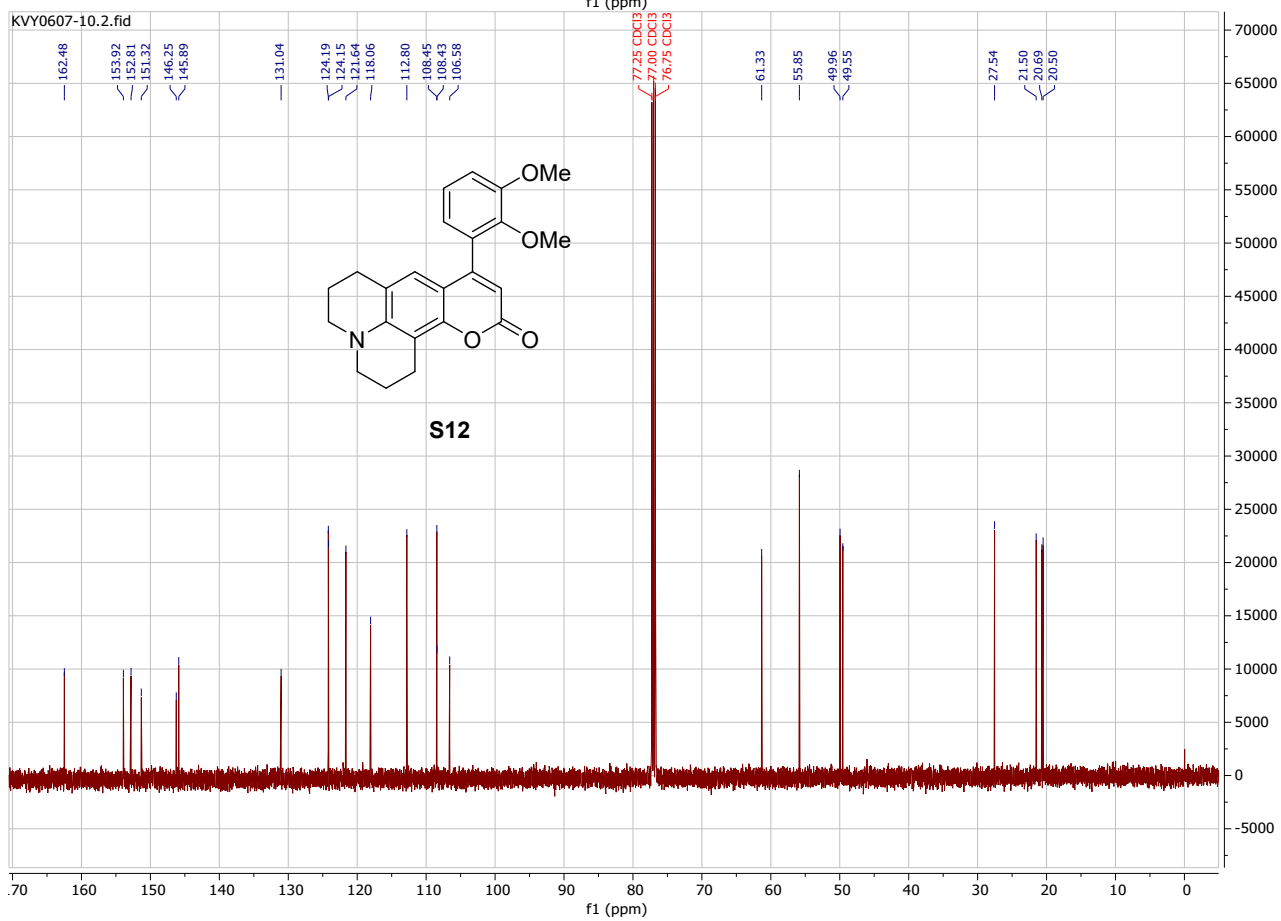

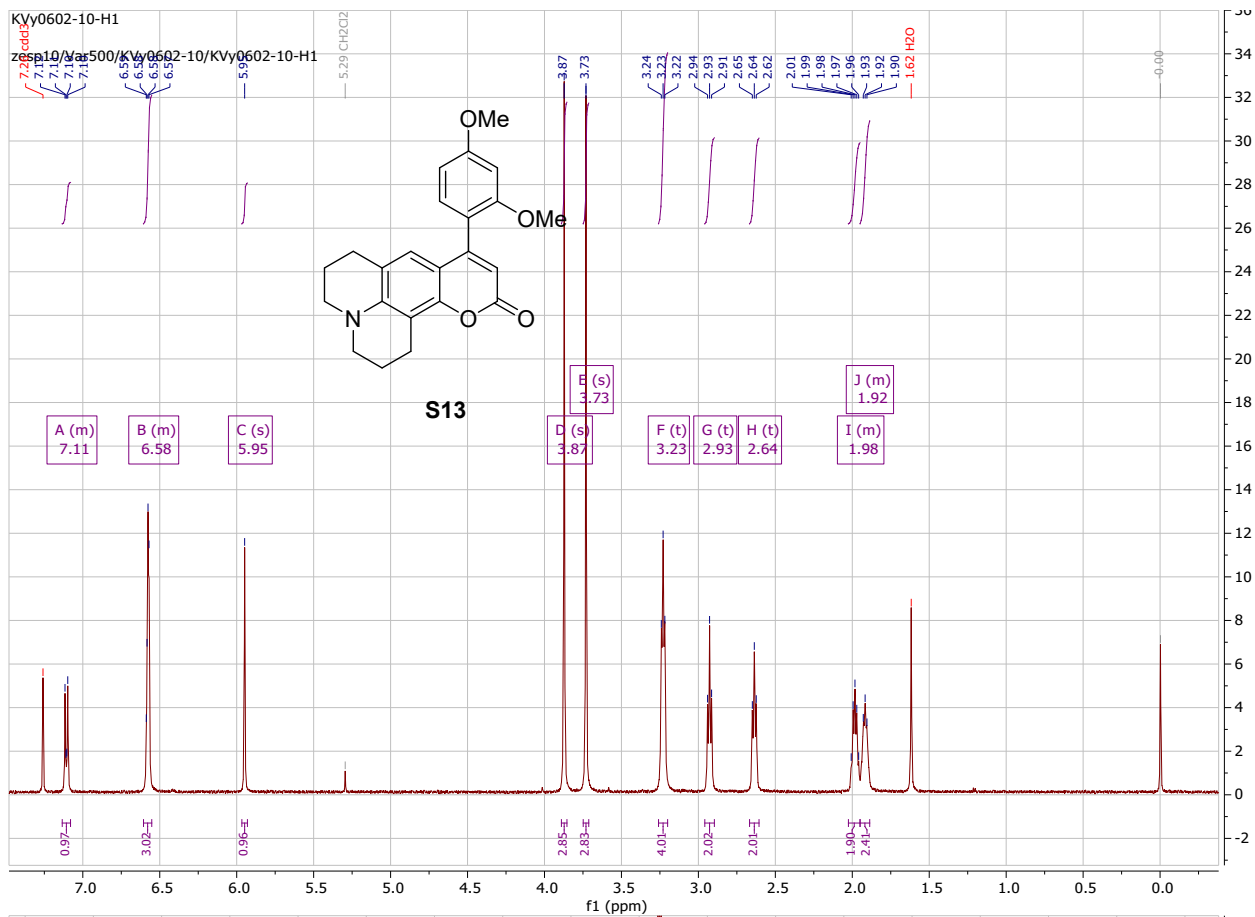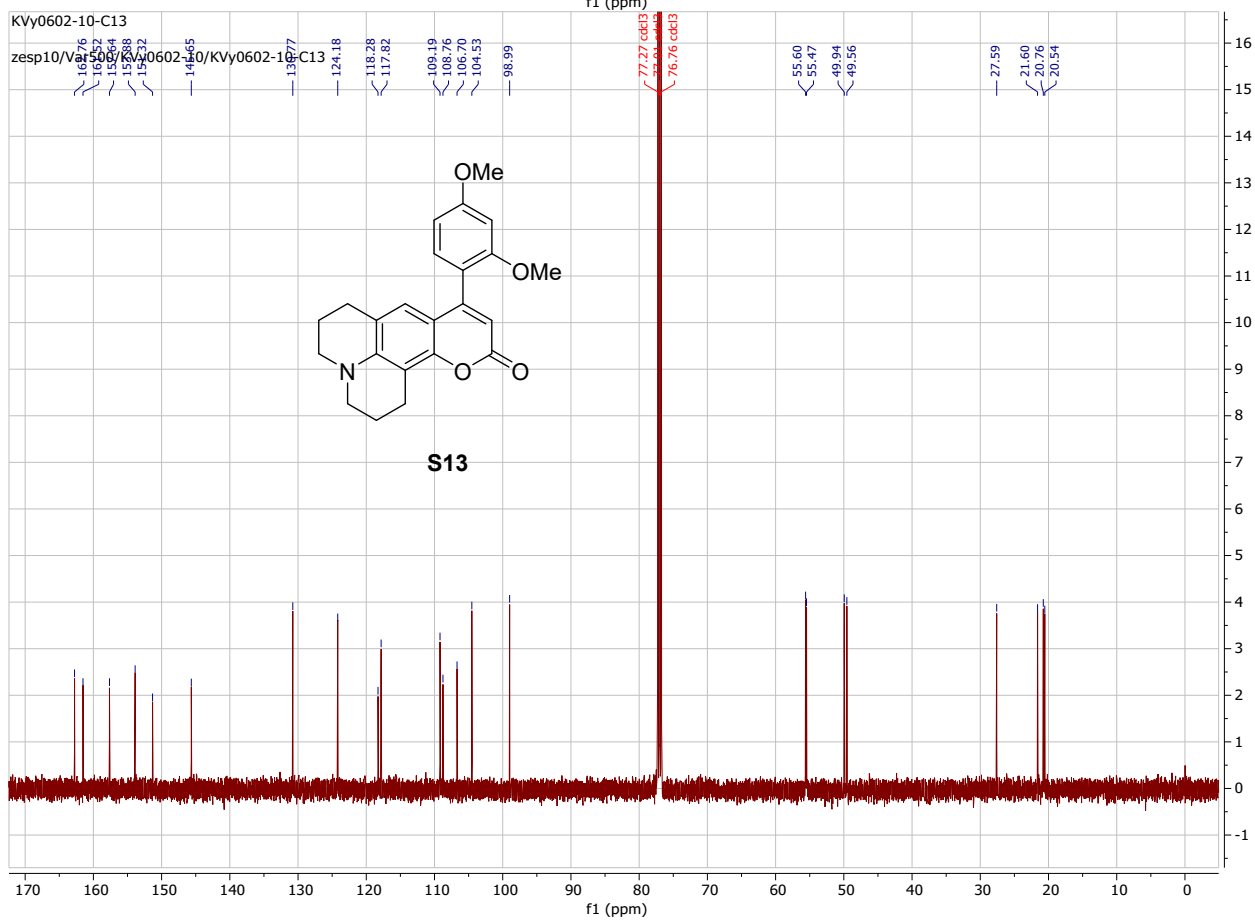

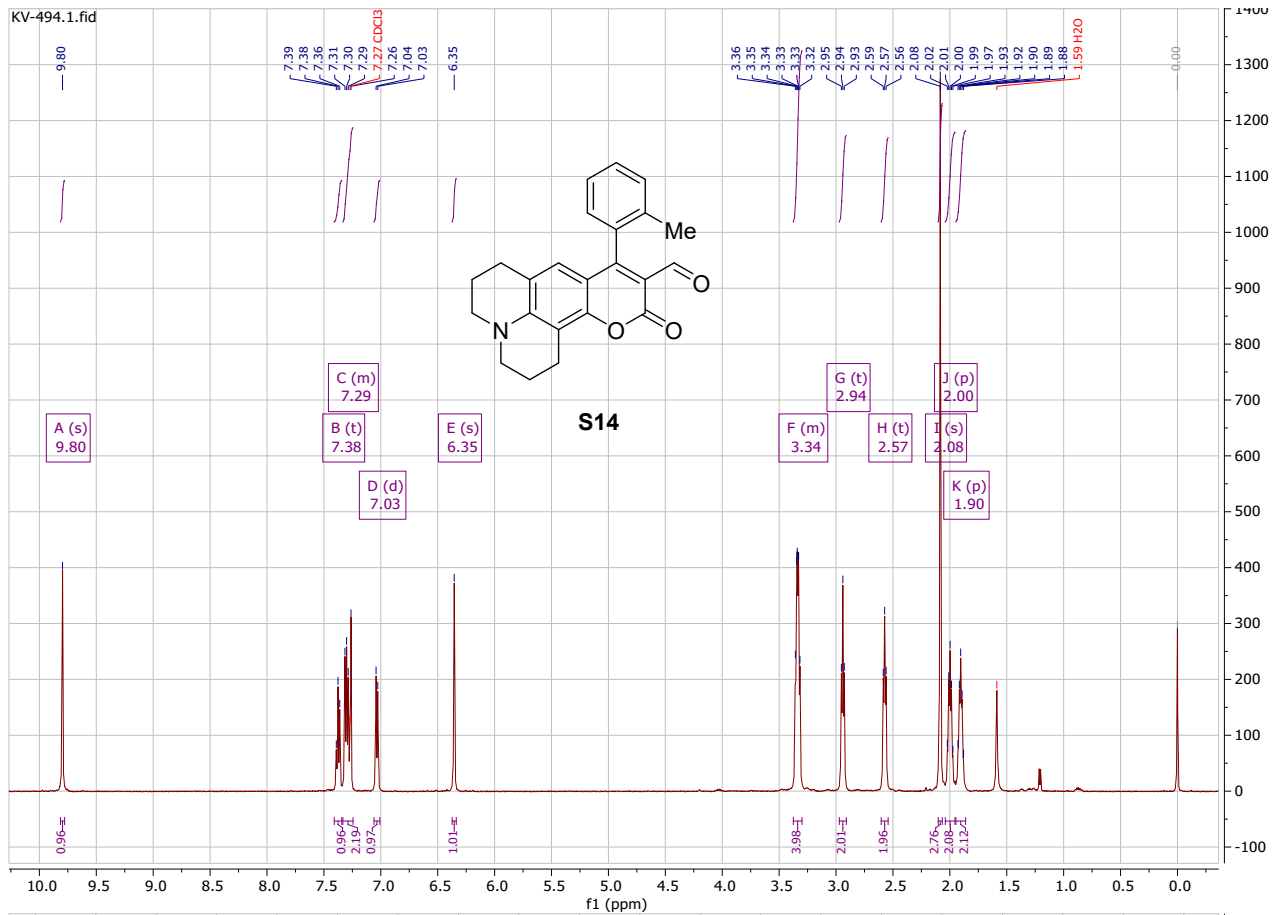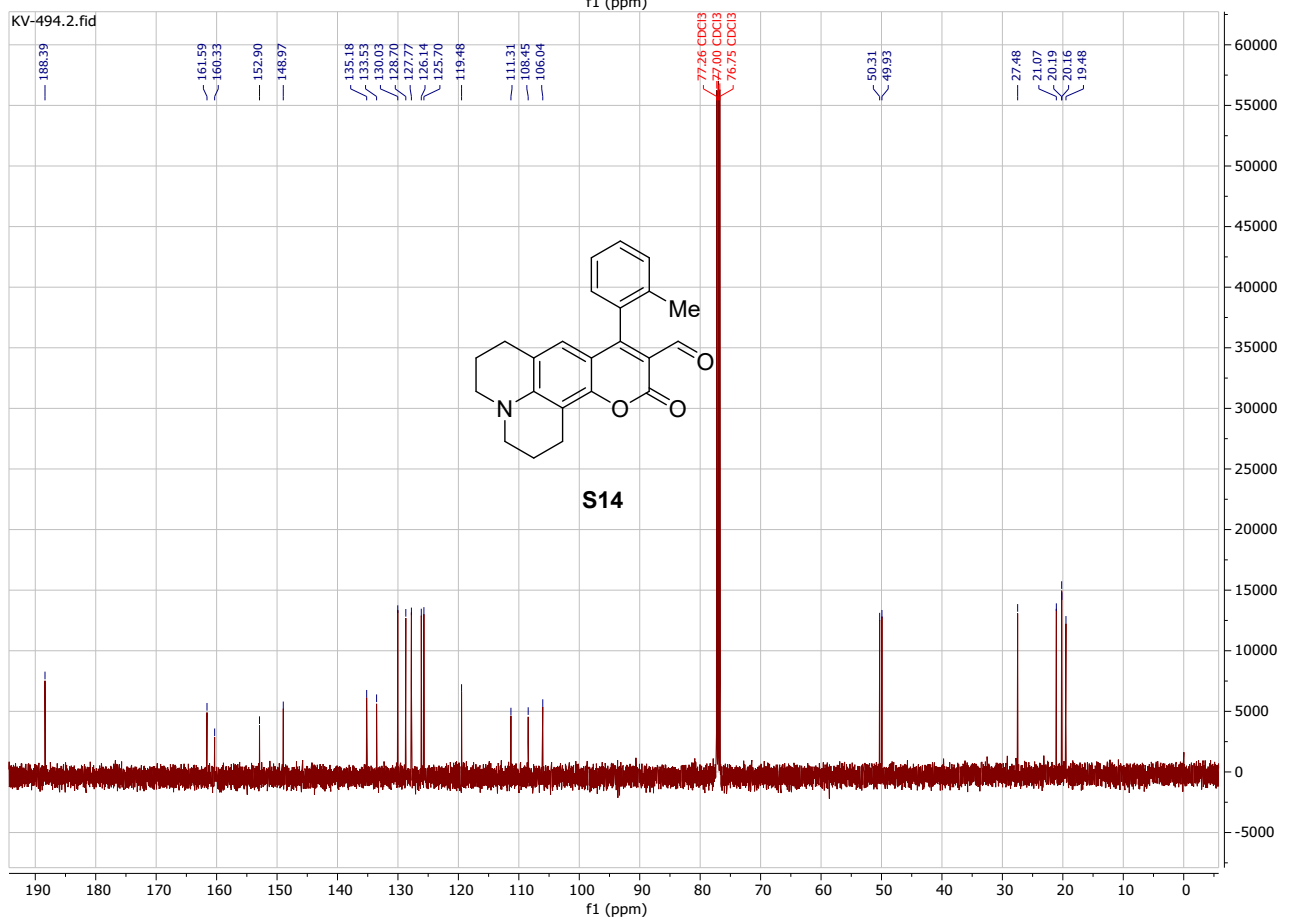

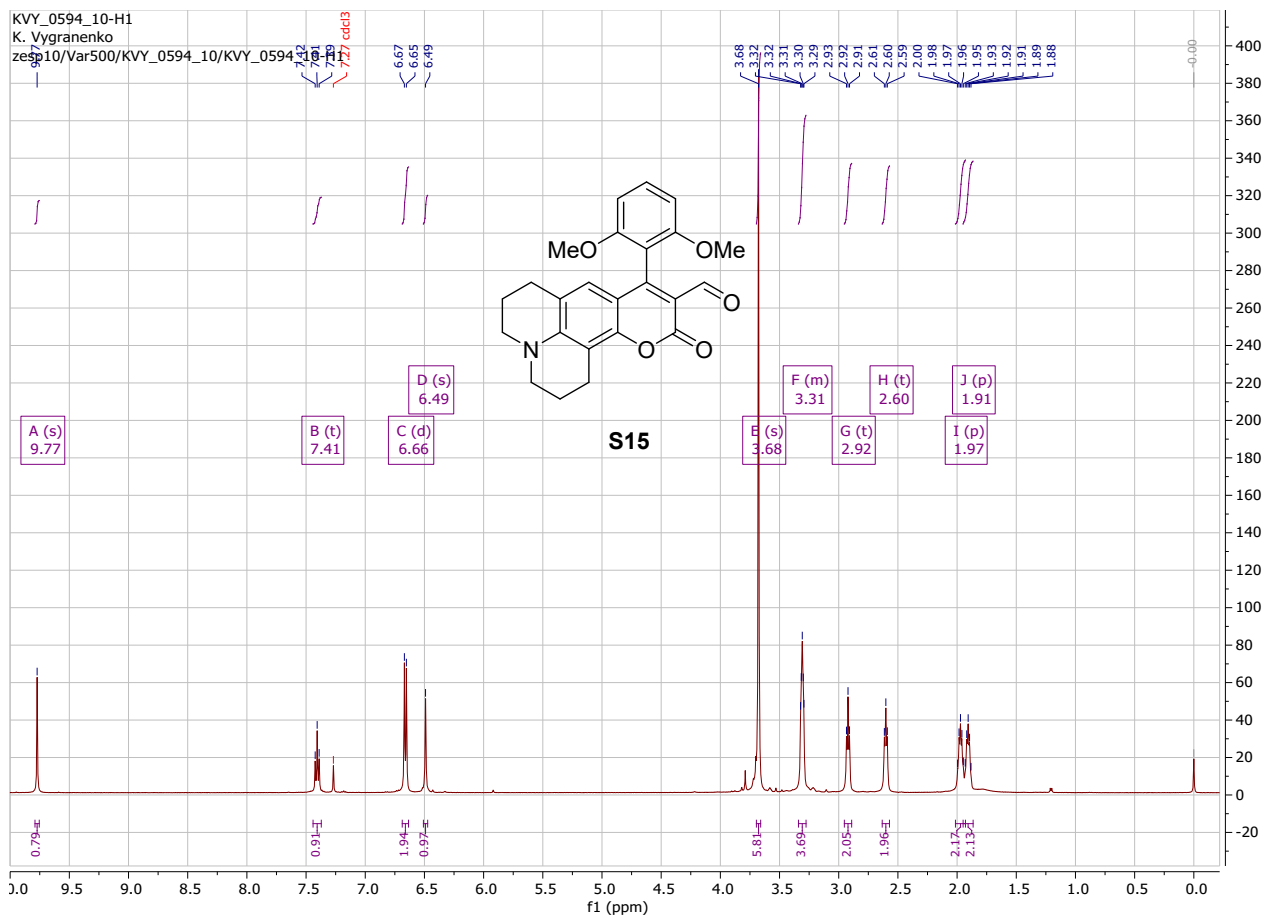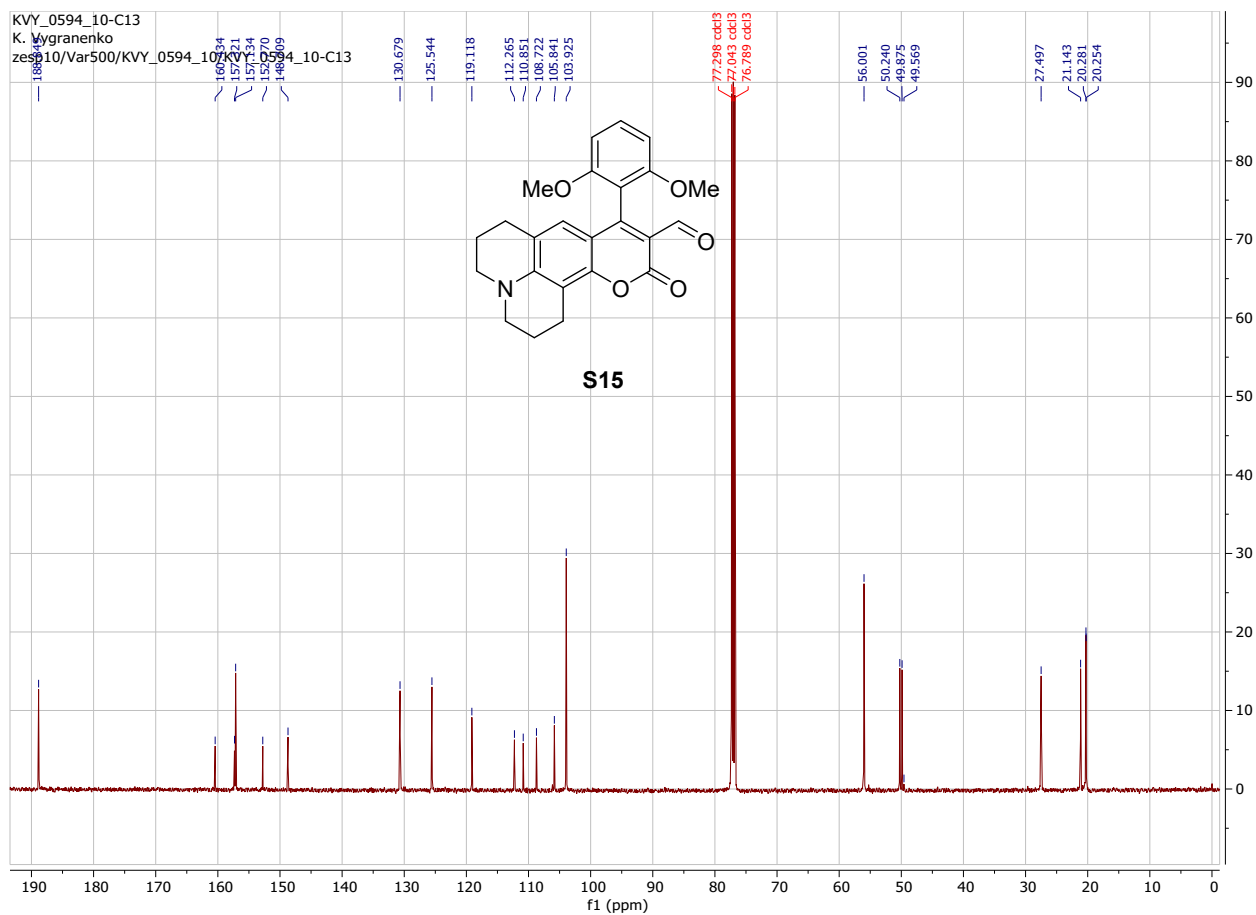

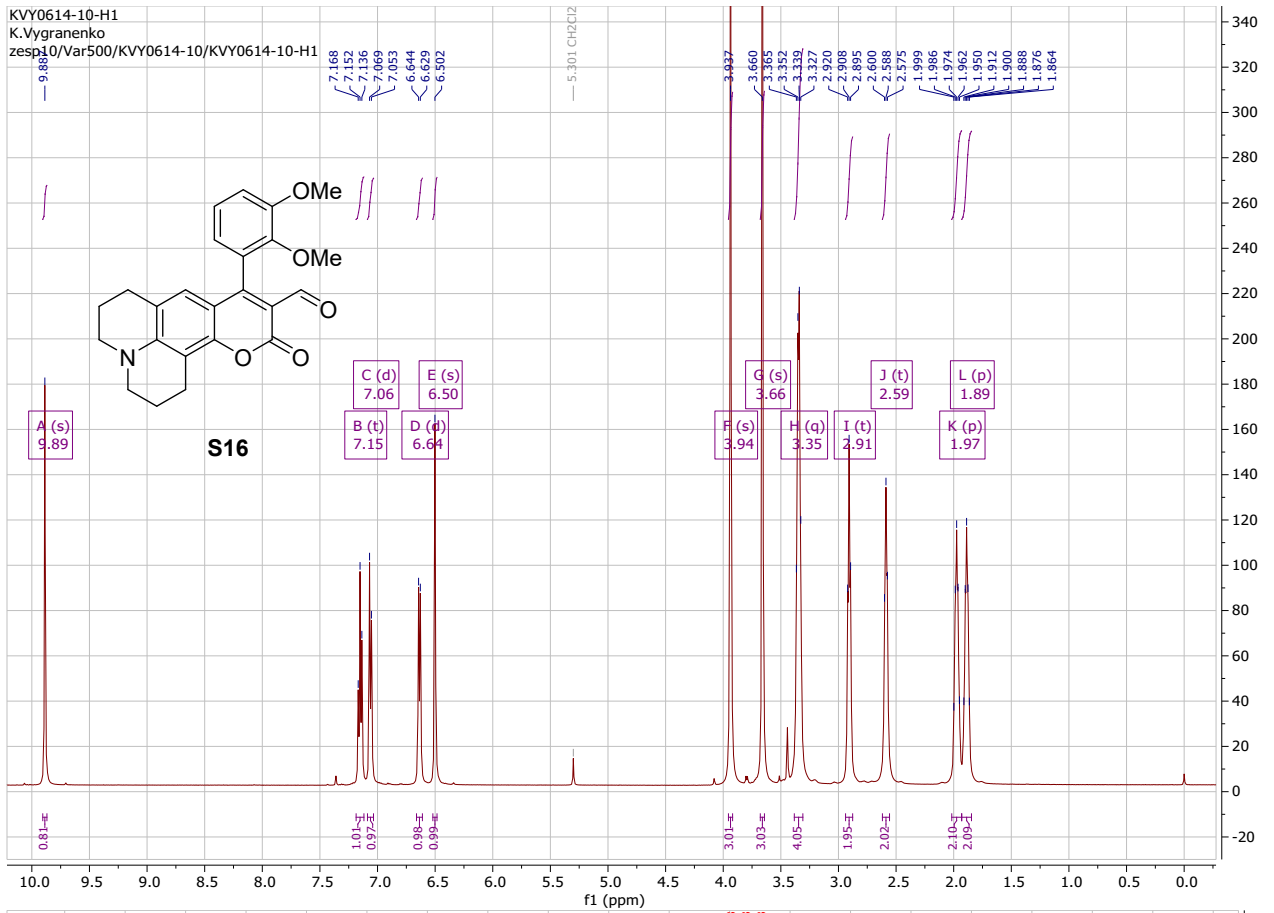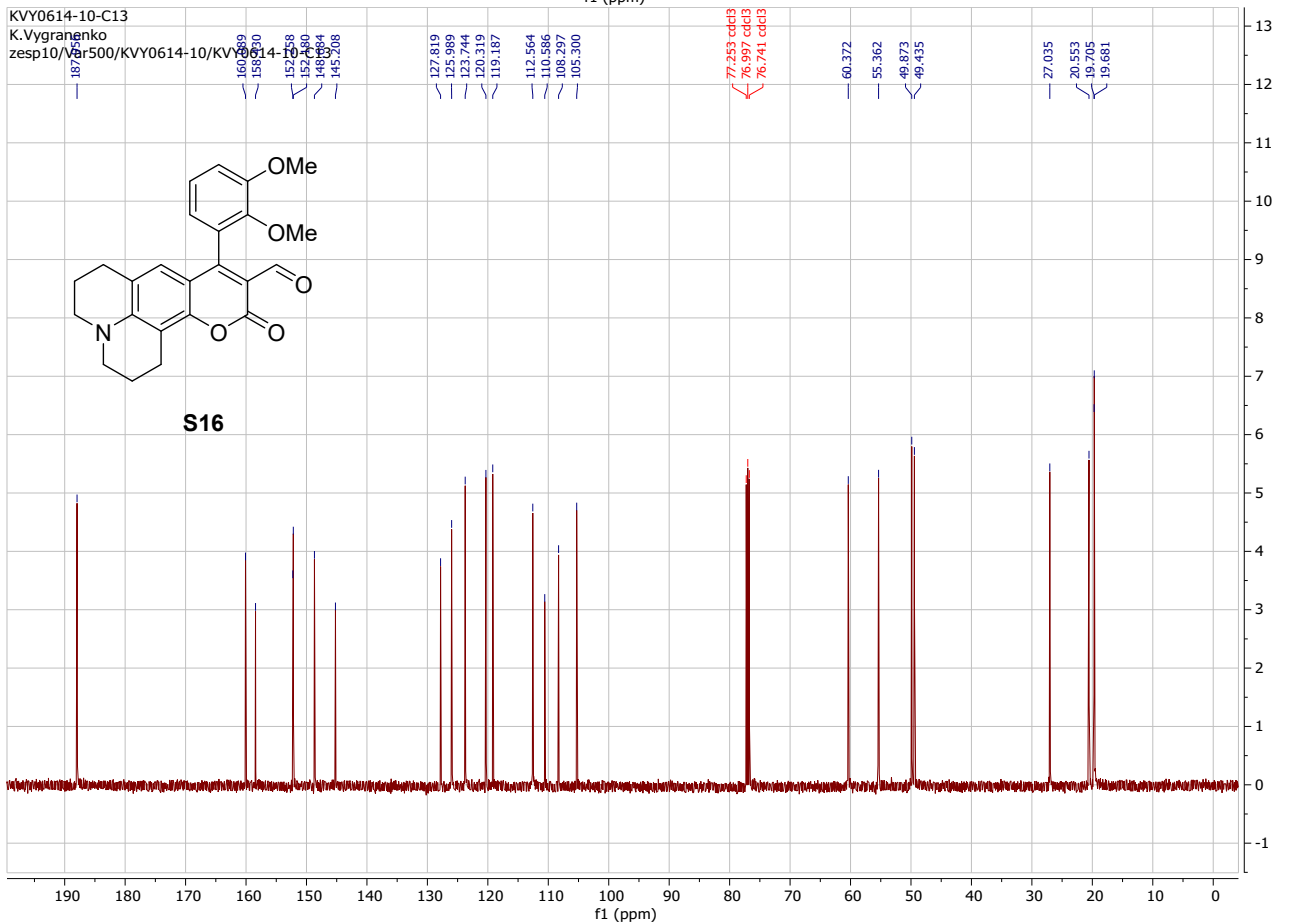

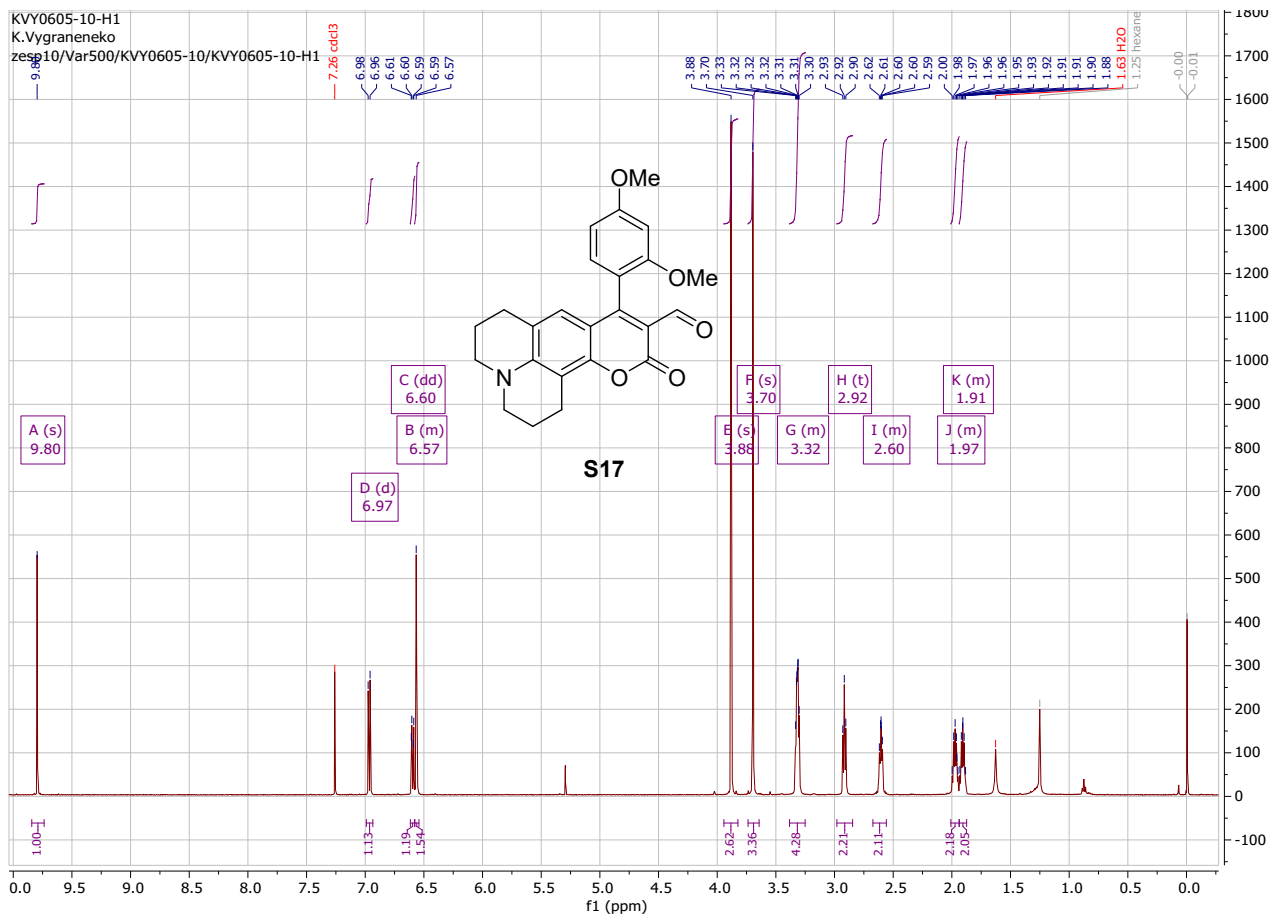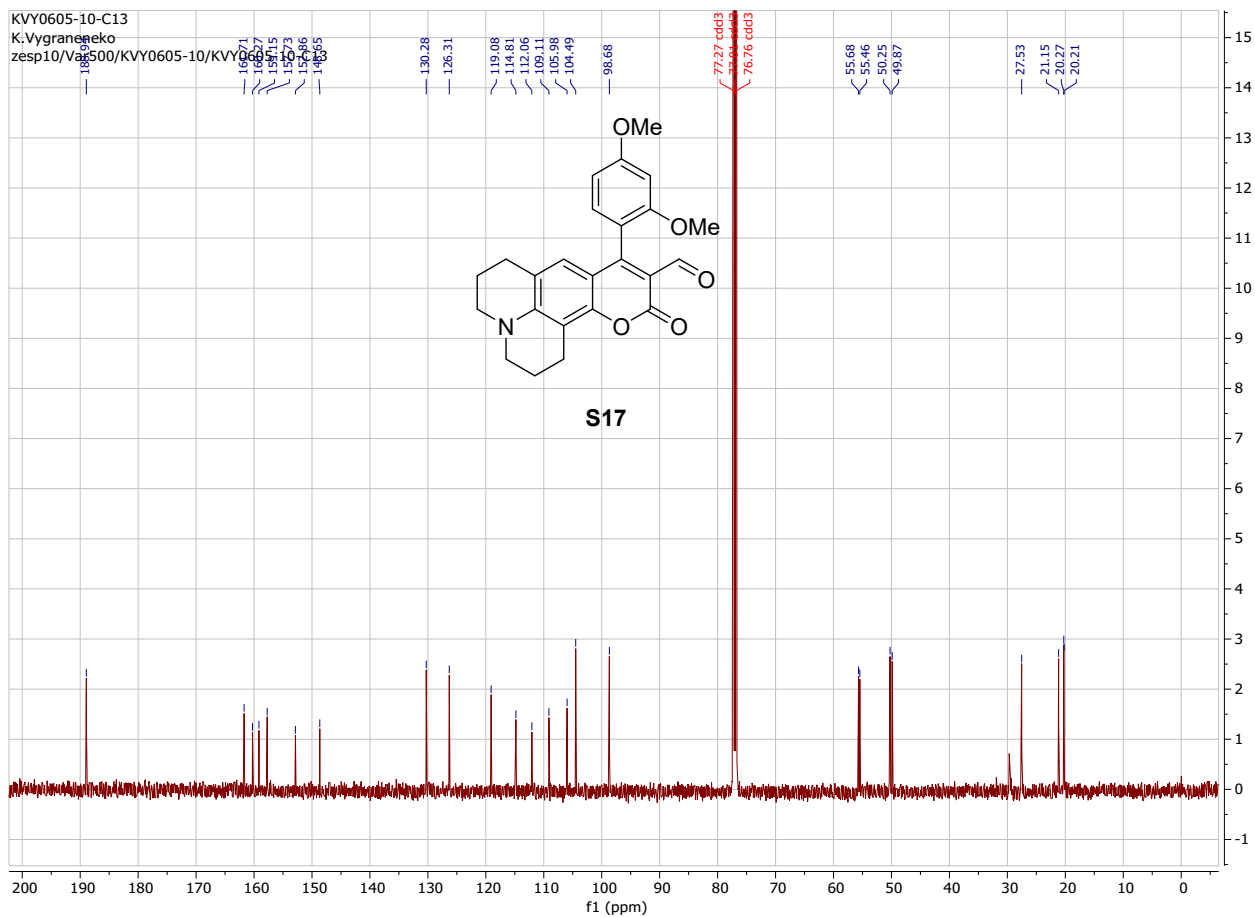

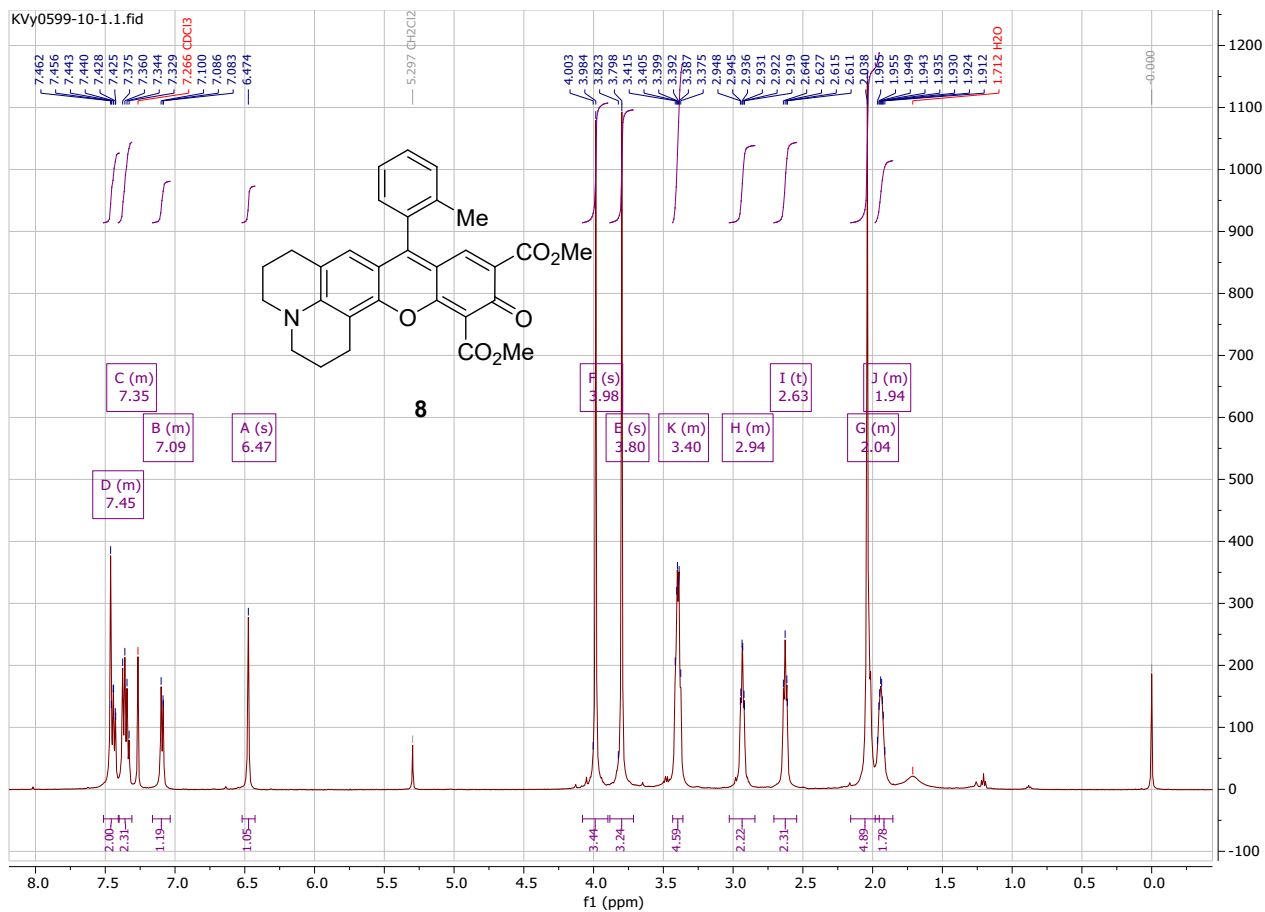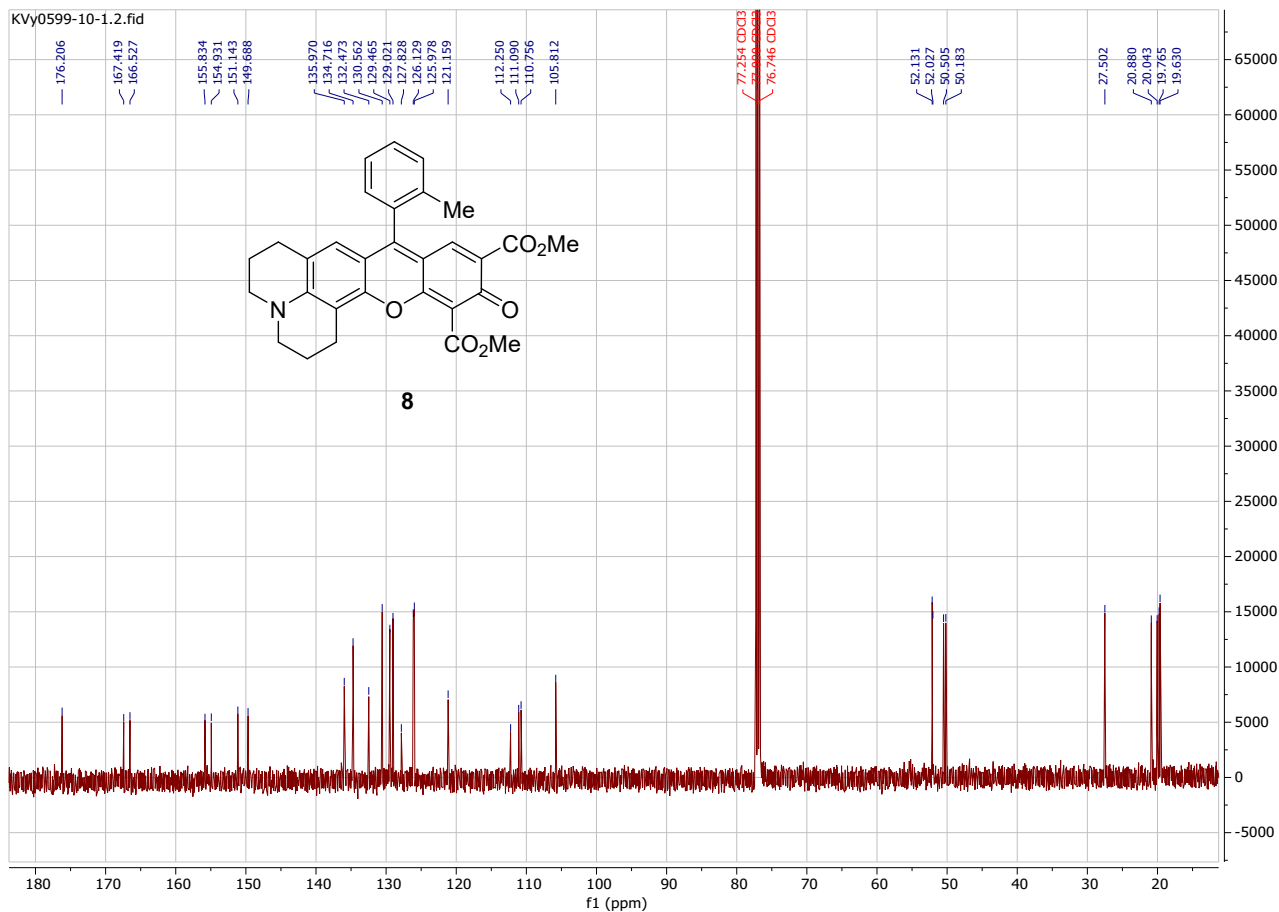



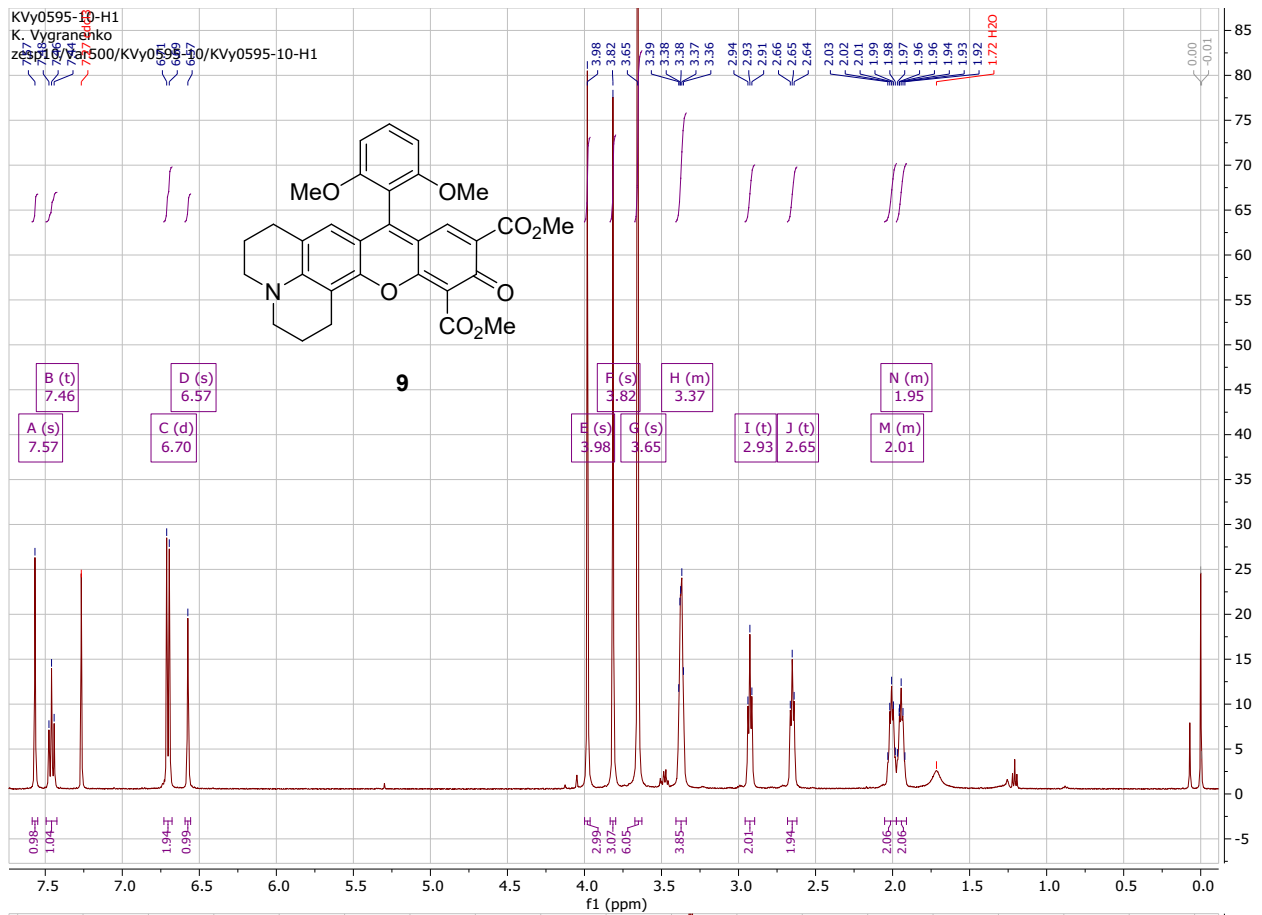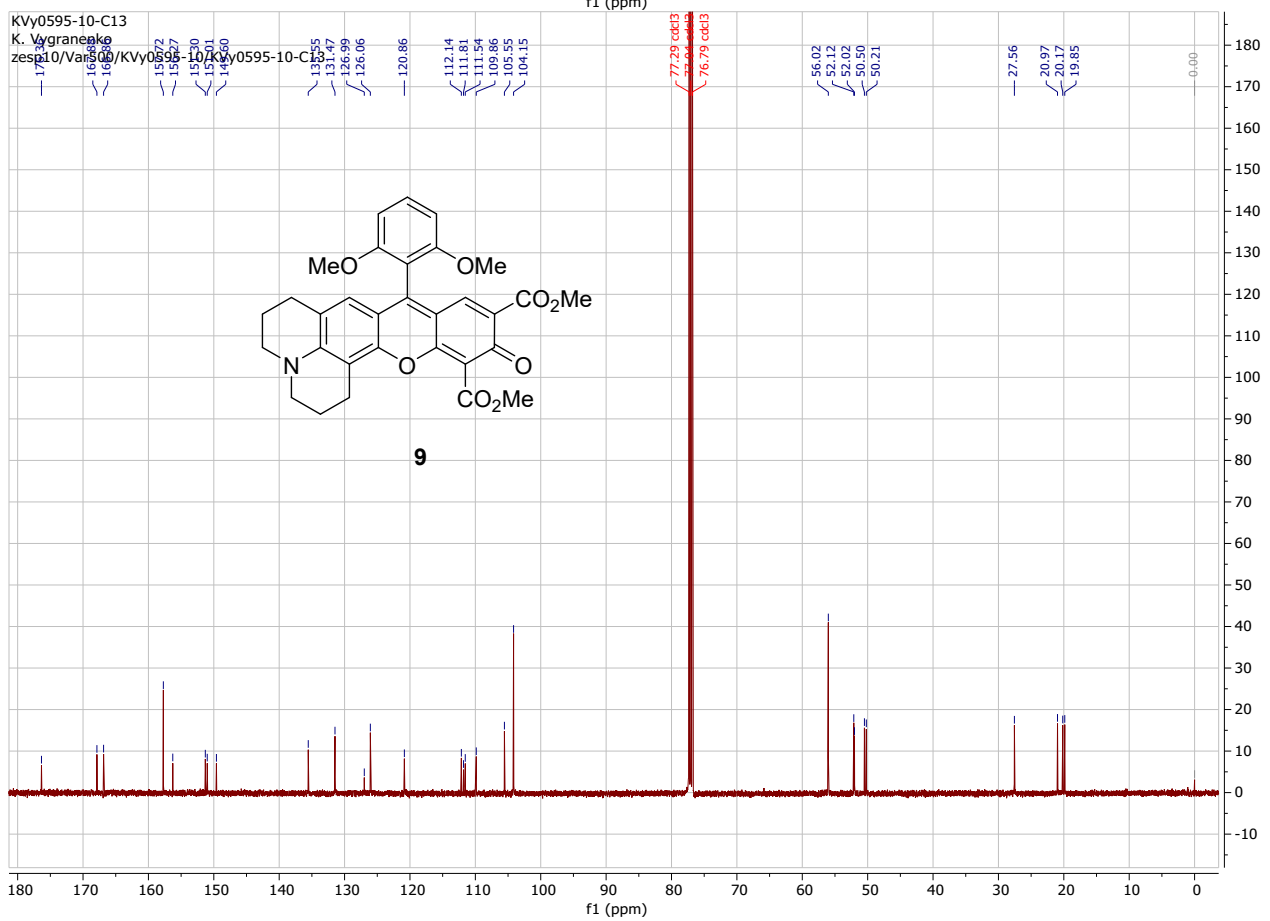

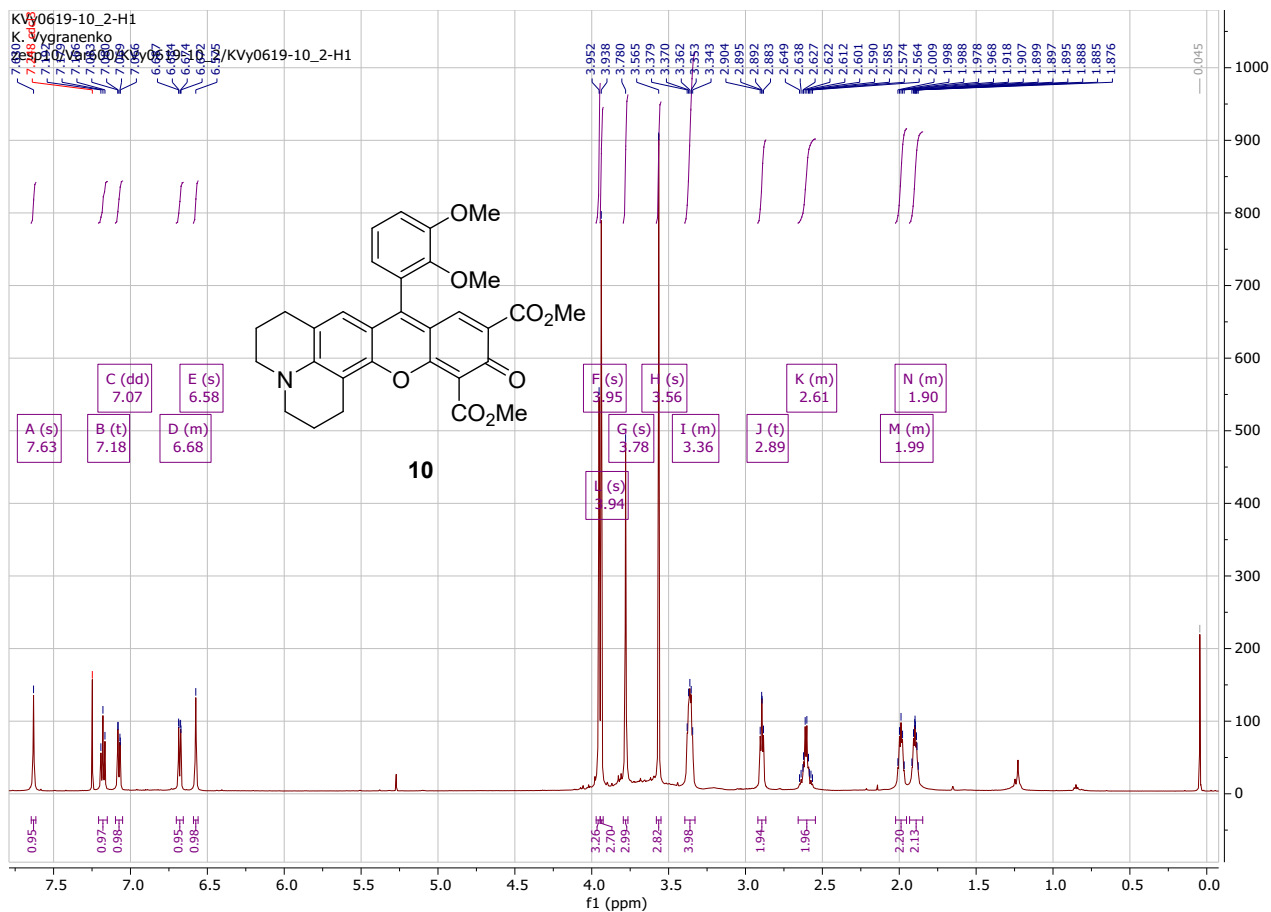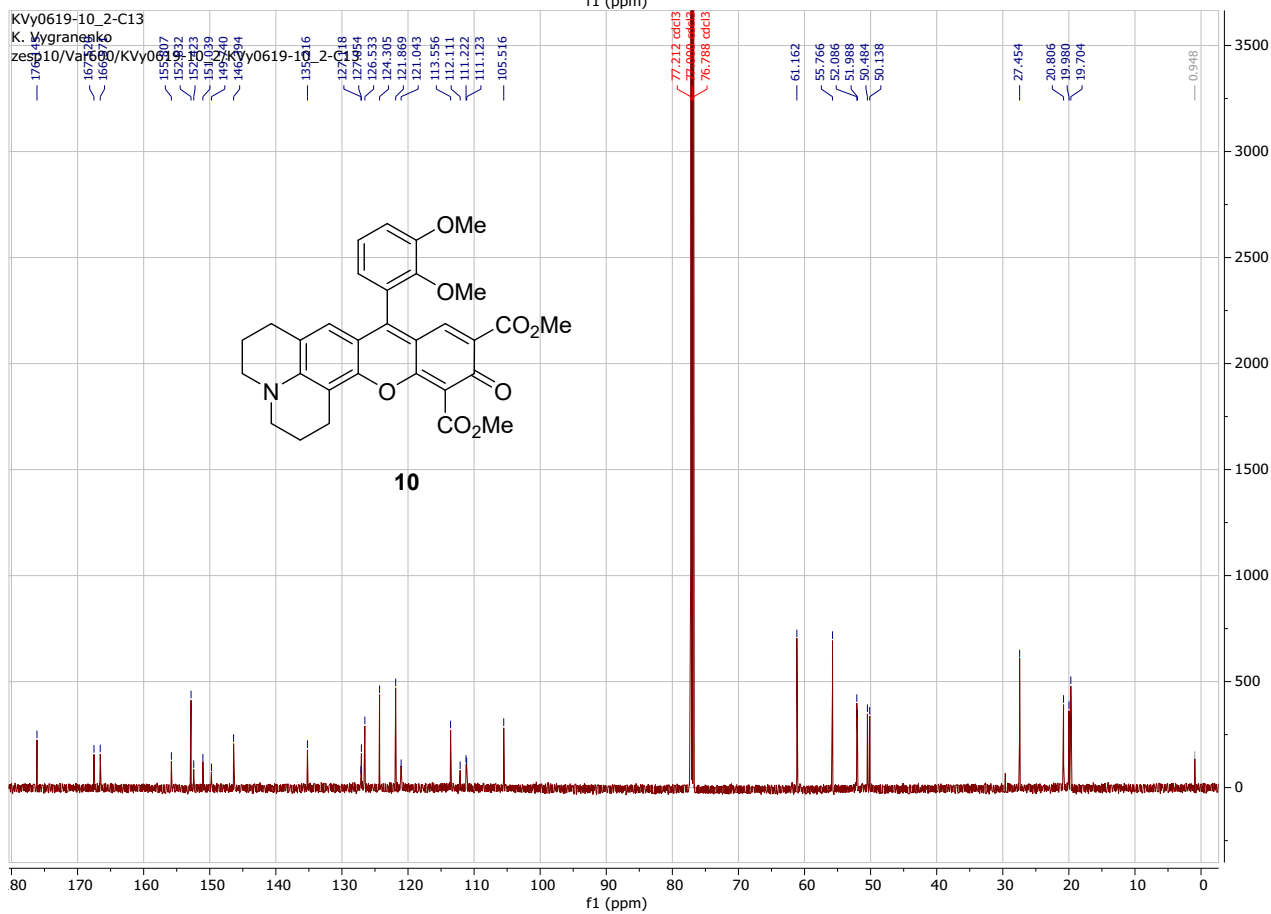

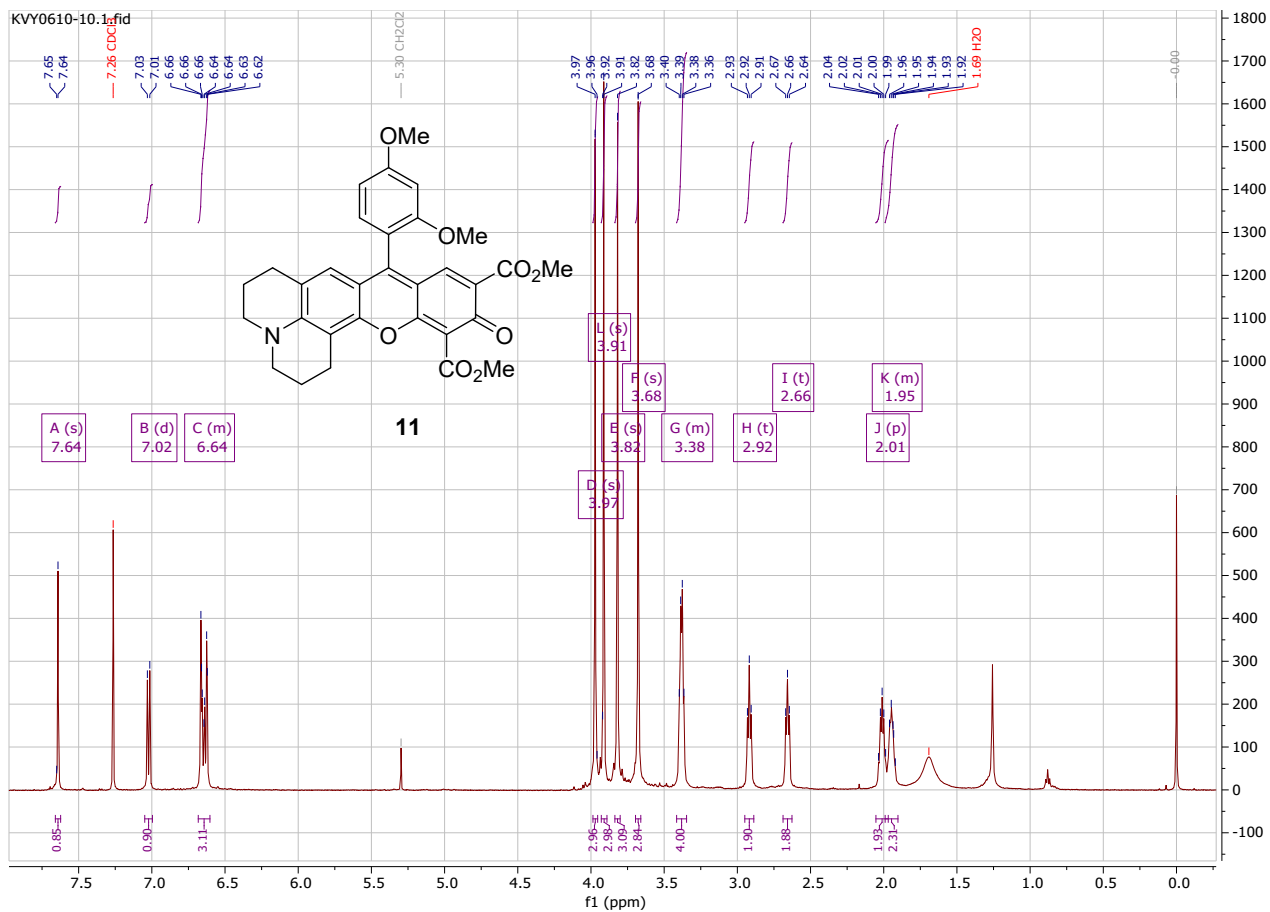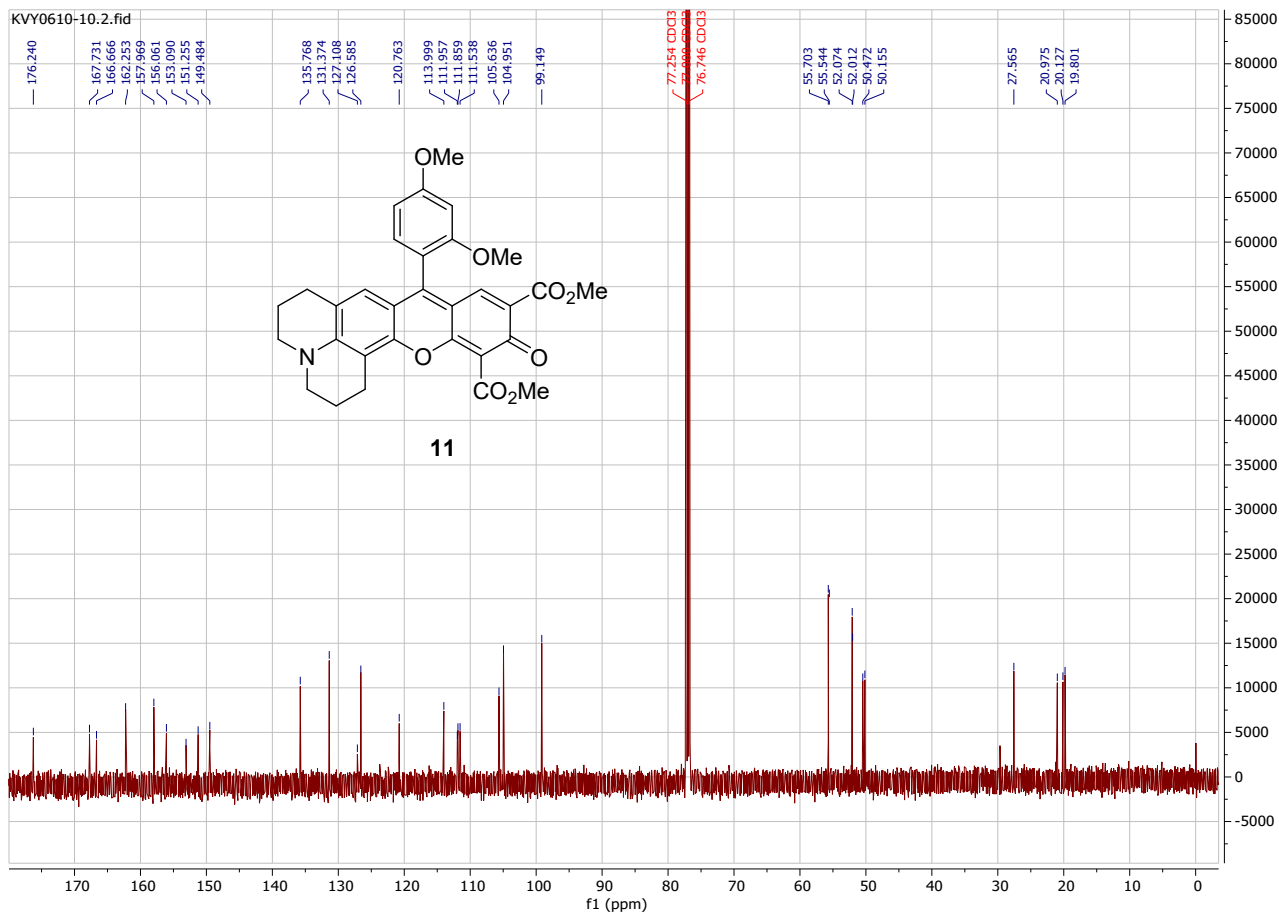

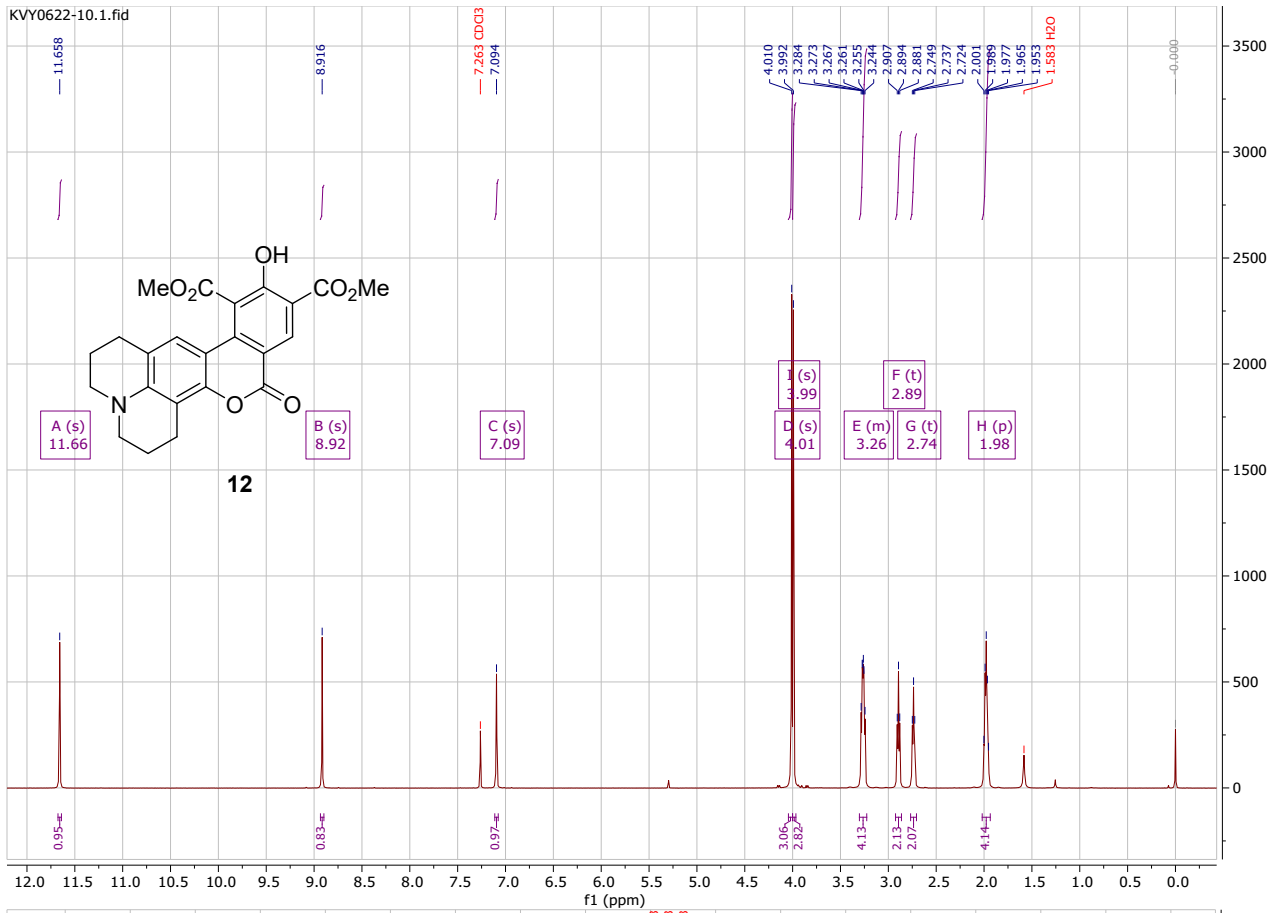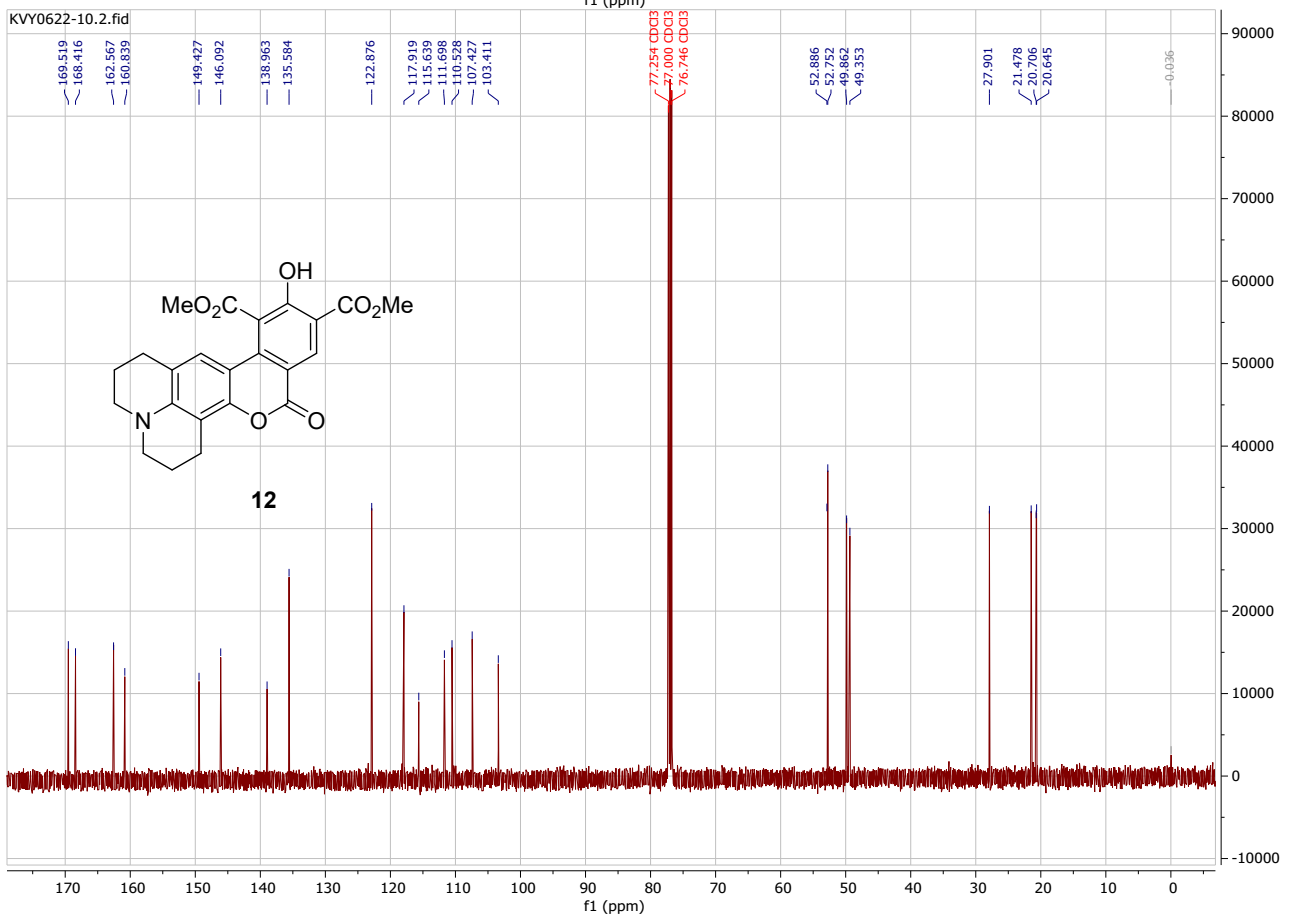

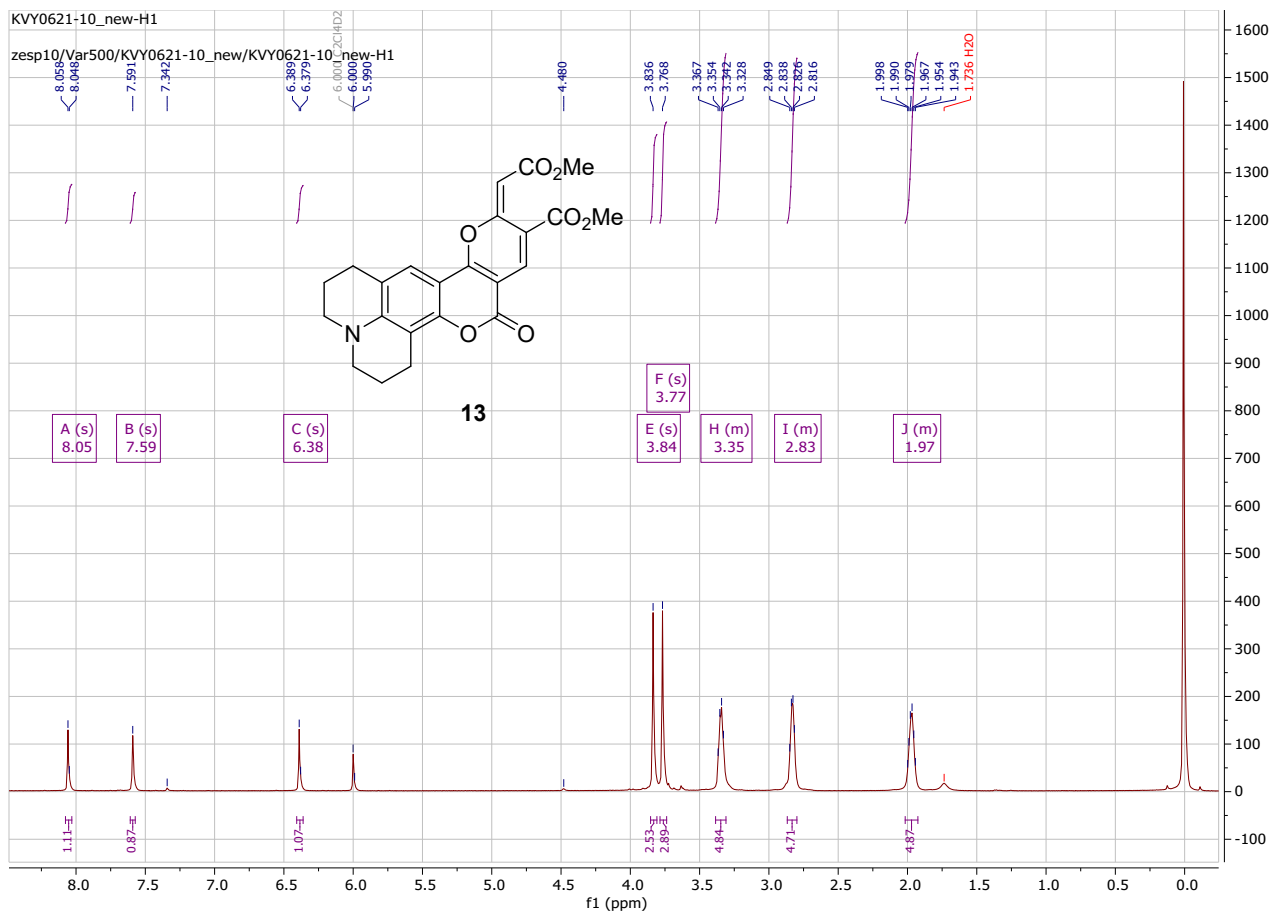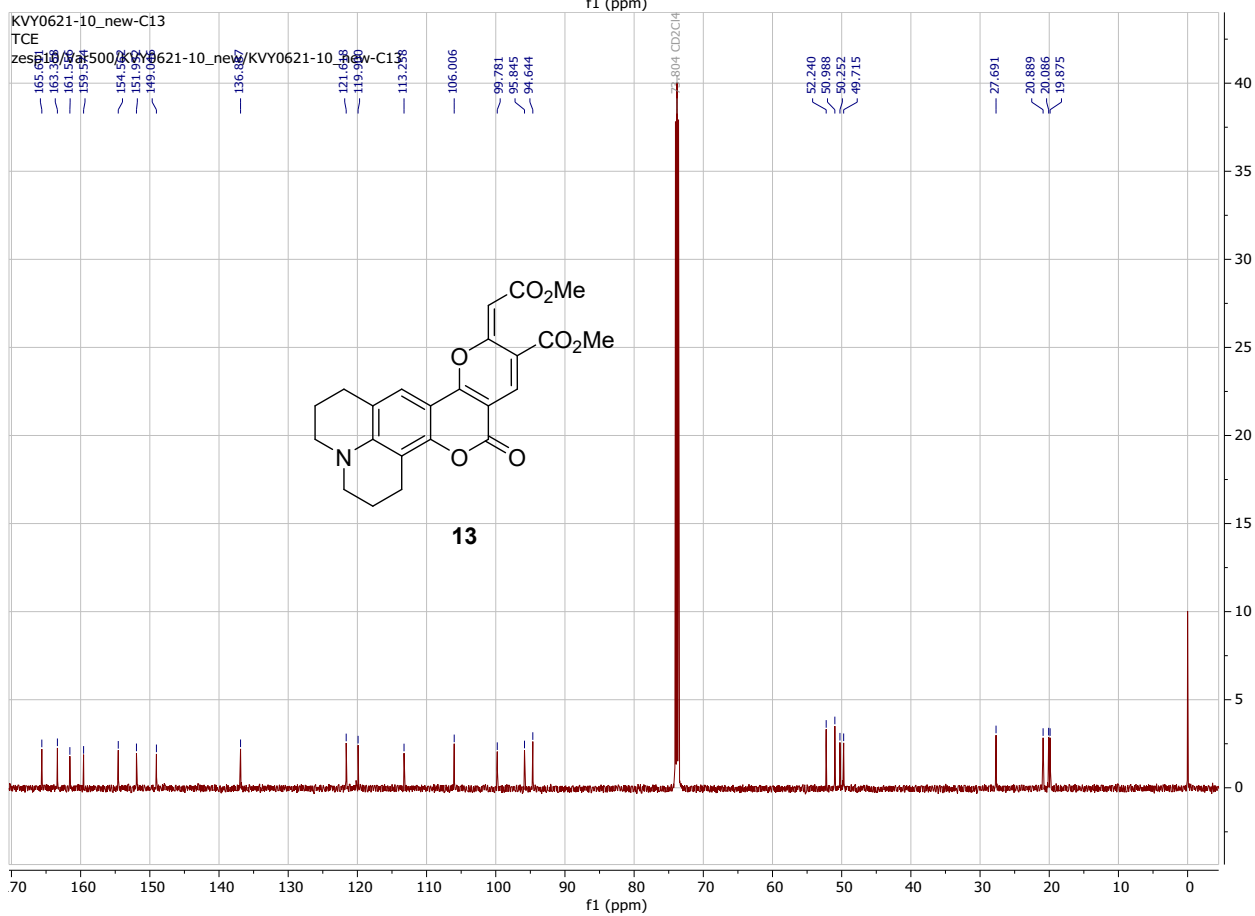

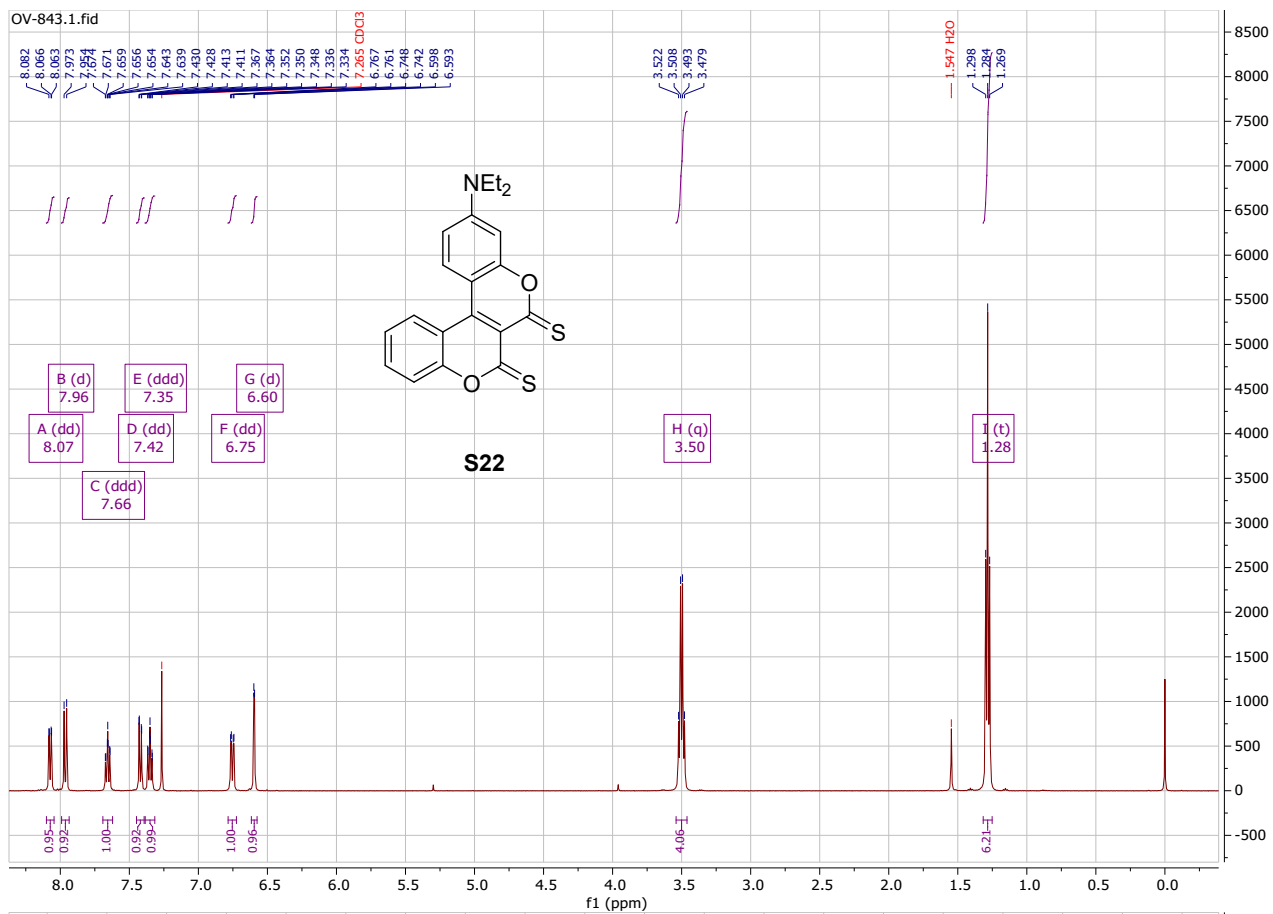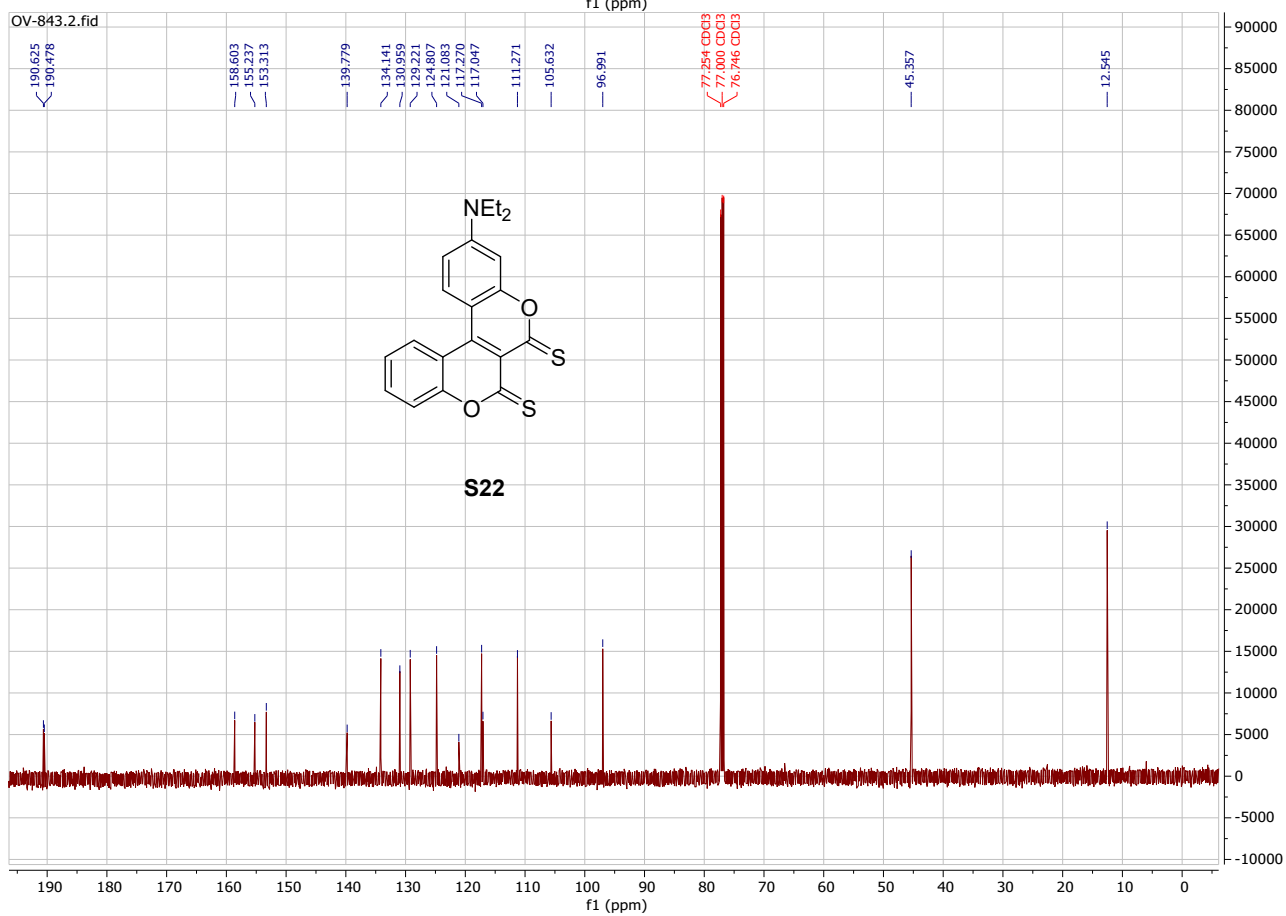

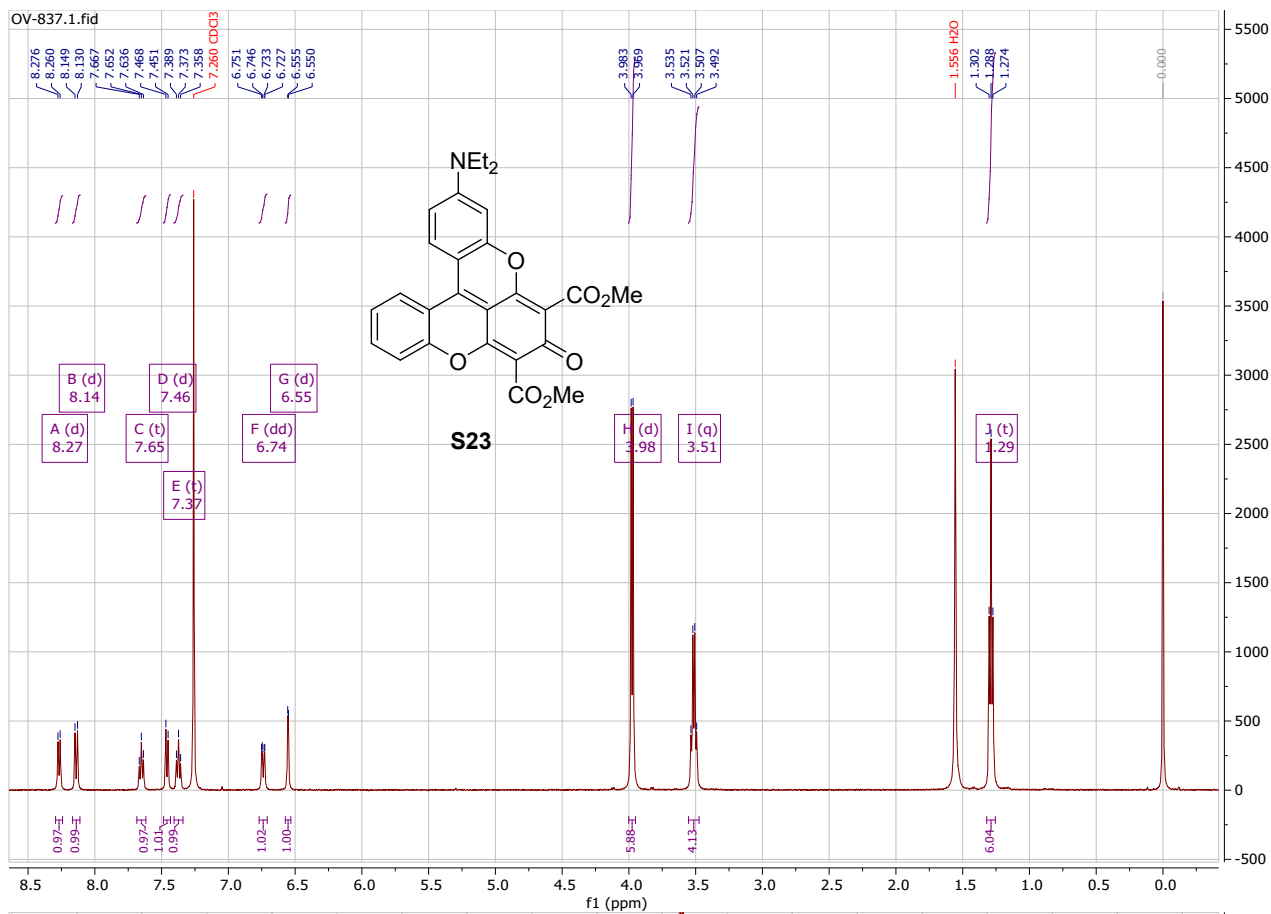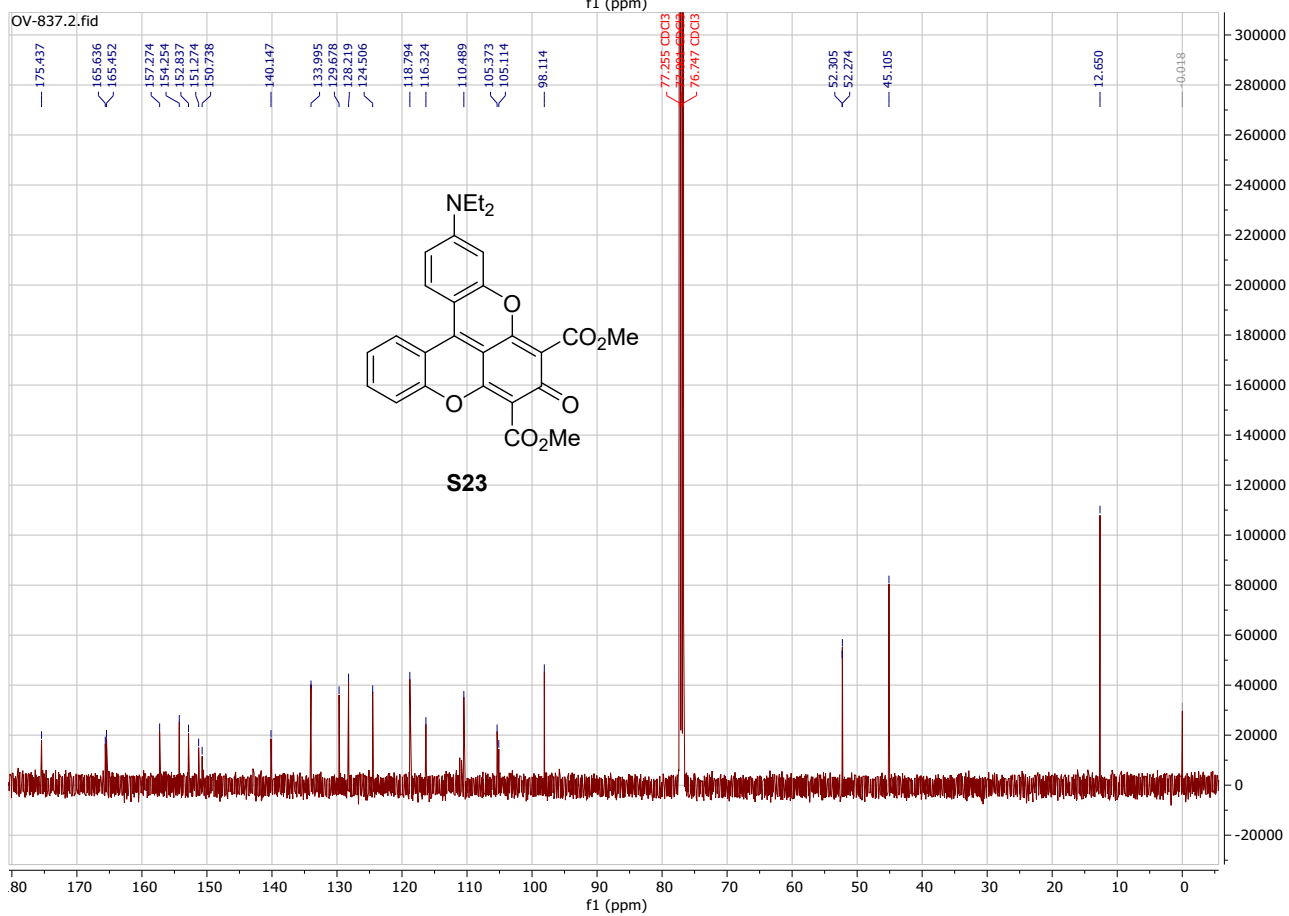

## Crystal Structure Report for 12

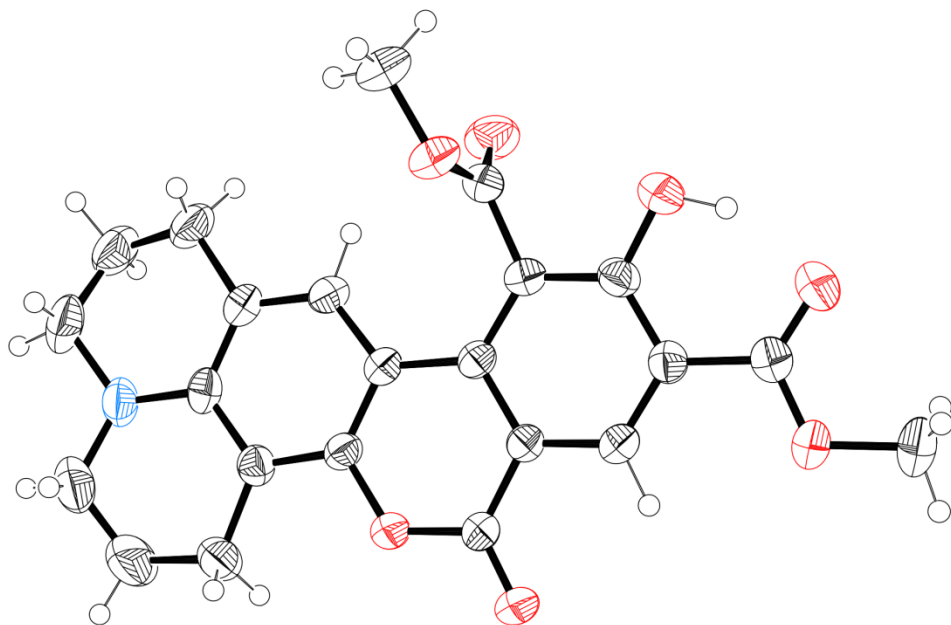

**Figure S3.** The ORTEP drawing<sup>4</sup> of X-ray diffraction analysis for compound **12**. CCDC 2125095.

A yellow prisms-like specimen of  $C_{23}H_{21}NO_7$ , approximate dimensions 0.194 mm x 0.244 mm x 0.368 mm, was used for the X-ray crystallographic analysis. The X-ray intensity data were measured.



**Table S1.** Data collection details for **12**.

| Axis  | dx/mm  | 2 $\theta$ /° | $\omega$ /° | $\phi$ /° | $\chi$ /° | Width/° | Frames | Time/s | Wavelength/Å | Voltage/kV | Current/mA | Temperature/K |
|-------|--------|---------------|-------------|-----------|-----------|---------|--------|--------|--------------|------------|------------|---------------|
| Omega | 39.835 | -97.72        | -192.85     | -178.62   | 24.03     | 2.00    | 54     | 88.00  | 1.54184      | 45         | 30.0       | n/a           |
| Omega | 39.835 | -101.63       | -206.31     | -24.27    | 43.23     | 2.00    | 56     | 88.00  | 1.54184      | 45         | 30.0       | n/a           |
| Omega | 39.835 | -101.30       | -209.35     | -83.58    | 50.32     | 2.00    | 57     | 88.00  | 1.54184      | 45         | 30.0       | n/a           |
| Phi   | 39.835 | -18.13        | -3.92       | -116.00   | 23.00     | 2.00    | 92     | 88.00  | 1.54184      | 45         | 30.0       | n/a           |
| Omega | 39.835 | -100.90       | -111.03     | -90.42    | -30.05    | 2.00    | 54     | 88.00  | 1.54184      | 45         | 30.0       | n/a           |
| Omega | 39.835 | -100.79       | -203.51     | -119.88   | 40.40     | 2.00    | 55     | 88.00  | 1.54184      | 45         | 30.0       | n/a           |
| Omega | 39.835 | 36.11         | -52.45      | -114.35   | 52.48     | 2.00    | 47     | 88.00  | 1.54184      | 45         | 30.0       | n/a           |
| Phi   | 39.835 | 85.61         | -280.32     | 0.00      | -58.06    | 2.00    | 180    | 88.00  | 1.54184      | 45         | 30.0       | n/a           |
| Omega | 39.835 | 27.38         | -337.08     | 0.00      | -54.74    | 2.00    | 57     | 88.00  | 1.54184      | 45         | 30.0       | n/a           |
| Omega | 39.835 | -101.22       | -108.86     | 19.45     | -42.31    | 2.00    | 56     | 88.00  | 1.54184      | 45         | 30.0       | n/a           |
| Omega | 39.835 | -100.90       | -205.62     | 22.16     | 43.34     | 2.00    | 56     | 88.00  | 1.54184      | 45         | 30.0       | n/a           |
| Omega | 39.835 | -100.87       | -206.52     | -166.47   | 46.12     | 2.00    | 56     | 88.00  | 1.54184      | 45         | 30.0       | n/a           |
| Omega | 39.835 | -101.30       | -204.15     | -50.83    | 40.80     | 2.00    | 55     | 88.00  | 1.54184      | 45         | 30.0       | n/a           |
| Omega | 39.835 | -99.71        | -200.88     | -223.75   | 36.03     | 2.00    | 55     | 88.00  | 1.54184      | 45         | 30.0       | n/a           |
| Omega | 39.835 | 84.67         | -280.79     | 90.00     | -54.74    | 2.00    | 58     | 88.00  | 1.54184      | 45         | 30.0       | n/a           |
| Omega | 39.835 | -101.22       | -209.09     | -148.00   | 49.76     | 2.00    | 57     | 88.00  | 1.54184      | 45         | 30.0       | n/a           |
| Omega | 39.835 | 84.67         | -280.79     | 180.00    | -54.74    | 2.00    | 58     | 88.00  | 1.54184      | 45         | 30.0       | n/a           |
| Omega | 39.835 | 84.67         | -280.79     | 0.00      | -54.74    | 2.00    | 58     | 88.00  | 1.54184      | 45         | 30.0       | n/a           |
| Omega | 39.835 | -100.35       | -109.65     | 72.81     | -32.08    | 2.00    | 54     | 88.00  | 1.54184      | 45         | 30.0       | n/a           |
| Omega | 39.835 | 27.38         | -337.08     | 153.00    | -54.74    | 2.00    | 57     | 88.00  | 1.54184      | 45         | 30.0       | n/a           |
| Phi   | 39.835 | -100.61       | -174.76     | -44.00    | 23.00     | 2.00    | 28     | 88.00  | 1.54184      | 45         | 30.0       | n/a           |
| Omega | 39.835 | 84.67         | -280.79     | 270.00    | -54.74    | 2.00    | 58     | 88.00  | 1.54184      | 45         | 30.0       | n/a           |
| Omega | 39.835 | -101.52       | -206.51     | 57.38     | 44.15     | 2.00    | 56     | 88.00  | 1.54184      | 45         | 30.0       | n/a           |
| Omega | 39.835 | -100.23       | -106.60     | -144.54   | -49.09    | 2.00    | 57     | 88.00  | 1.54184      | 45         | 30.0       | n/a           |
| Omega | 39.835 | -100.91       | -106.03     | -34.93    | -55.74    | 2.00    | 58     | 88.00  | 1.54184      | 45         | 30.0       | n/a           |
| Omega | 39.835 | -101.15       | -205.37     | 80.53     | 41.85     | 2.00    | 56     | 88.00  | 1.54184      | 45         | 30.0       | n/a           |
| Omega | 39.835 | 12.38         | -353.08     | 270.00    | -54.74    | 2.00    | 58     | 88.00  | 1.54184      | 45         | 30.0       | n/a           |

| Axis  | dx/mm  | 2 $\theta$ /° | $\omega$ /° | $\phi$ /° | $\chi$ /° | Width/° | Frames | Time/s | Wavelength/Å | Voltage/kV | Current/mA | Temperature/K |
|-------|--------|---------------|-------------|-----------|-----------|---------|--------|--------|--------------|------------|------------|---------------|
| Omega | 39.835 | -97.67        | -64.94      | -136.03   | -74.84    | 2.00    | 46     | 88.00  | 1.54184      | 45         | 30.0       | n/a           |
| Phi   | 39.835 | 70.61         | -295.32     | 0.00      | -58.06    | 2.00    | 180    | 88.00  | 1.54184      | 45         | 30.0       | n/a           |

A total of 1869 frames were collected. The total exposure time was 45.69 hours. The frames were integrated with the Bruker SAINT software package using a narrow-frame algorithm. The integration of the data using a monoclinic unit cell yielded a total of 20848 reflections to a maximum  $\theta$  angle of  $68.75^\circ$  ( $0.83 \text{ \AA}$  resolution), of which 3496 were independent (average redundancy 5.963, completeness = 97.3%,  $R_{\text{int}} = 6.44\%$ ,  $R_{\text{sig}} = 4.22\%$ ) and 2521 (72.11%) were greater than  $2\sigma(F^2)$ . The final cell constants of  $a = 11.7140(13) \text{ \AA}$ ,  $b = 9.9926(12) \text{ \AA}$ ,  $c = 16.775(2) \text{ \AA}$ ,  $\beta = 98.713(7)^\circ$ , volume =  $1940.9(4) \text{ \AA}^3$ , are based upon the refinement of the XYZ-centroids of 7169 reflections above  $20 \sigma(I)$  with  $5.329^\circ < 2\theta < 136.6^\circ$ . Data were corrected for absorption effects using the numerical method (SADABS). The ratio of minimum to maximum apparent transmission was 0.825. The calculated minimum and maximum transmission coefficients (based on crystal size) are 0.7320 and 0.8440.

The structure was solved and refined using the Bruker SHELXTL Software Package, using the space group  $P 1 21/n 1$ , with  $Z = 4$  for the formula unit,  $C_{23}H_{21}NO_7$ . The final anisotropic full-matrix least-squares refinement on  $F^2$  with 326 variables converged at  $R1 = 4.93\%$ , for the observed data and  $wR2 = 13.29\%$  for all data. The goodness-of-fit was 1.015. The largest peak in the final difference electron density synthesis was  $0.650 \text{ e}/\text{\AA}^3$  and the largest hole was  $-0.324 \text{ e}/\text{\AA}^3$  with an RMS deviation of  $0.044 \text{ e}/\text{\AA}^3$ . On the basis of the final model, the calculated density was  $1.449 \text{ g}/\text{cm}^3$  and  $F(000)$ , 888  $e^-$ .

**Table S2.** Sample and crystal data for **12**.

|                        |                               |                           |
|------------------------|-------------------------------|---------------------------|
| Identification code    | KVY0620A                      |                           |
| Chemical formula       | $C_{23}H_{21}NO_7$            |                           |
| Formula weight         | 423.41 g/mol                  |                           |
| Temperature            | 296(2) K                      |                           |
| Wavelength             | 1.54178 $\text{\AA}$          |                           |
| Crystal size           | 0.194 x 0.244 x 0.368 mm      |                           |
| Crystal habit          | yellow prisms                 |                           |
| Crystal system         | monoclinic                    |                           |
| Space group            | $P 1 21/n 1$                  |                           |
| Unit cell dimensions   | $a = 11.7140(13) \text{ \AA}$ | $\alpha = 90^\circ$       |
|                        | $b = 9.9926(12) \text{ \AA}$  | $\beta = 98.713(7)^\circ$ |
|                        | $c = 16.775(2) \text{ \AA}$   | $\gamma = 90^\circ$       |
| Volume                 | $1940.9(4) \text{ \AA}^3$     |                           |
| Z                      | 4                             |                           |
| Density (calculated)   | $1.449 \text{ g}/\text{cm}^3$ |                           |
| Absorption coefficient | $0.903 \text{ mm}^{-1}$       |                           |
| $F(000)$               | 888                           |                           |

**Table S3.** Data collection and structure refinement for **12**.

|                                     |                                                                    |
|-------------------------------------|--------------------------------------------------------------------|
| Theta range for data collection     | 4.31 to $68.75^\circ$                                              |
| Index ranges                        | $-14 \leq h \leq 14$ , $-11 \leq k \leq 10$ , $-20 \leq l \leq 20$ |
| Reflections collected               | 20848                                                              |
| Independent reflections             | 3496 [ $R(\text{int}) = 0.0644$ ]                                  |
| Coverage of independent reflections | 97.3%                                                              |
| Absorption correction               | numerical                                                          |
| Max. and min. transmission          | 0.8440 and 0.7320                                                  |
| Structure solution technique        | direct methods                                                     |

|                                   |                                                                                                                         |                           |
|-----------------------------------|-------------------------------------------------------------------------------------------------------------------------|---------------------------|
| Structure solution program        | SHELXL-2014 (Sheldrick, 2014)                                                                                           |                           |
| Refinement method                 | Full-matrix least-squares on F <sup>2</sup>                                                                             |                           |
| Refinement program                | SHELXL-2014 (Sheldrick, 2014)                                                                                           |                           |
| Function minimized                | $\sum w(F_o^2 - F_c^2)^2$                                                                                               |                           |
| Data / restraints / parameters    | 3496 / 0 / 326                                                                                                          |                           |
| Goodness-of-fit on F <sup>2</sup> | 1.015                                                                                                                   |                           |
| Final R indices                   | 2521 data; I>2 $\sigma$ (I)                                                                                             | R1 = 0.0493, wR2 = 0.1180 |
|                                   | all data                                                                                                                | R1 = 0.0726, wR2 = 0.1329 |
| Weighting scheme                  | w=1/[ $\sigma^2(F_o^2)+(0.0563P)^2+0.9257P$ ]<br>where P=(F <sub>o</sub> <sup>2</sup> +2F <sub>c</sub> <sup>2</sup> )/3 |                           |
| Largest diff. peak and hole       | 0.650 and -0.324 eÅ <sup>-3</sup>                                                                                       |                           |
| R.M.S. deviation from mean        | 0.044 eÅ <sup>-3</sup>                                                                                                  |                           |

**Table S4.** Atomic coordinates and equivalent isotropic atomic displacement parameters (Å<sup>2</sup>) for **12**. U(eq) is defined as one third of the trace of the orthogonalized U<sub>ij</sub> tensor.

|    | x/a         | y/b         | z/c         | U(eq)      |
|----|-------------|-------------|-------------|------------|
| N1 | 0.79545(16) | 0.8429(2)   | 0.96972(13) | 0.0496(5)  |
| O1 | 0.40679(11) | 0.73599(15) | 0.98848(9)  | 0.0430(4)  |
| O2 | 0.22301(12) | 0.69230(18) | 0.98329(10) | 0.0534(5)  |
| O3 | 0.42098(15) | 0.32825(19) | 0.27994(10) | 0.0564(5)  |
| O4 | 0.65852(14) | 0.33896(17) | 0.22349(11) | 0.0592(5)  |
| O5 | 0.63780(12) | 0.53689(17) | 0.28201(9)  | 0.0484(4)  |
| O6 | 0.20390(14) | 0.27387(19) | 0.26422(11) | 0.0596(5)  |
| O7 | 0.08283(13) | 0.38296(18) | 0.17120(11) | 0.0560(5)  |
| C1 | 0.9165(2)   | 0.8403(3)   | 0.0081(2)   | 0.0665(8)  |
| C2 | 0.9551(2)   | 0.7029(3)   | 0.0347(2)   | 0.0626(8)  |
| C3 | 0.88157(19) | 0.6484(3)   | 0.09211(18) | 0.0543(7)  |
| C4 | 0.75485(17) | 0.6737(2)   | 0.06535(13) | 0.0387(5)  |
| C5 | 0.71712(17) | 0.7696(2)   | 0.00534(14) | 0.0383(5)  |
| C6 | 0.59773(17) | 0.7873(2)   | 0.98031(13) | 0.0369(5)  |
| C7 | 0.5524(2)   | 0.8849(3)   | 0.91468(18) | 0.0501(6)  |
| C8 | 0.6456(3)   | 0.9451(4)   | 0.8743(2)   | 0.0893(11) |

|     | x/a         | y/b       | z/c         | U(eq)      |
|-----|-------------|-----------|-------------|------------|
|     |             |           |             | )          |
| C9  | 0.7564(2)   | 0.9621(3) | 0.9255(2)   | 0.0719(9)  |
| C10 | 0.67491(17) | 0.6033(2) | 0.10043(14) | 0.0377(5)  |
| C11 | 0.55527(16) | 0.6212(2) | 0.08003(13) | 0.0335(5)  |
| C12 | 0.52187(16) | 0.7126(2) | 0.01808(13) | 0.0343(5)  |
| C13 | 0.31944(16) | 0.6681(2) | 0.01591(13) | 0.0365(5)  |
| C14 | 0.35030(16) | 0.5755(2) | 0.08252(12) | 0.0316(5)  |
| C15 | 0.46661(16) | 0.5535(2) | 0.11724(12) | 0.0314(5)  |
| C16 | 0.48664(17) | 0.4678(2) | 0.18456(13) | 0.0351(5)  |
| C17 | 0.39510(18) | 0.4064(2) | 0.21439(13) | 0.0381(5)  |
| C18 | 0.28036(17) | 0.4263(2) | 0.17743(13) | 0.0370(5)  |
| C19 | 0.26035(17) | 0.5115(2) | 0.11245(13) | 0.0356(5)  |
| C20 | 0.60377(18) | 0.4383(2) | 0.23082(14) | 0.0394(5)  |
| C21 | 0.7529(2)   | 0.5265(3) | 0.32706(17) | 0.0644(8)  |
| C22 | 0.18693(19) | 0.3537(2) | 0.20899(14) | 0.0430(6)  |
| C23 | 0.9883(2)   | 0.3055(4) | 0.1955(2)   | 0.0831(10) |

**Table S5.** Bond lengths (Å) for **12**.

|        |          |        |          |
|--------|----------|--------|----------|
| N1-C5  | 1.379(3) | N1-C9  | 1.441(3) |
| N1-C1  | 1.466(3) | O1-C13 | 1.364(2) |
| O1-C12 | 1.384(2) | O2-C13 | 1.203(2) |
| O3-C17 | 1.345(3) | O3-H3  | 0.95(3)  |
| O4-C20 | 1.198(3) | O5-C20 | 1.328(3) |
| O5-C21 | 1.446(3) | O6-C22 | 1.216(3) |
| O7-C22 | 1.319(3) | O7-C23 | 1.458(3) |
| C1-C2  | 1.492(4) | C1-H1A | 0.99(3)  |
| C1-H1B | 1.08(4)  | C2-C3  | 1.489(4) |
| C2-H2A | 0.98(3)  | C2-H2B | 1.06(3)  |
| C3-C4  | 1.506(3) | C3-H3A | 0.99(3)  |
| C3-H3B | 1.00(3)  | C4-C10 | 1.373(3) |
| C4-C5  | 1.411(3) | C5-C6  | 1.409(3) |
| C6-C12 | 1.385(3) | C6-C7  | 1.506(3) |

|          |          |          |          |
|----------|----------|----------|----------|
| C7-C8    | 1.496(4) | C7-H7A   | 0.95(3)  |
| C7-H7B   | 0.95(3)  | C8-C9    | 1.454(4) |
| C8-H8A   | 0.97     | C8-H8B   | 0.97     |
| C9-H9A   | 0.97     | C9-H9B   | 0.97     |
| C10-C11  | 1.403(3) | C10-H10  | 0.97(3)  |
| C11-C12  | 1.395(3) | C11-C15  | 1.457(3) |
| C13-C14  | 1.454(3) | C14-C19  | 1.390(3) |
| C14-C15  | 1.415(3) | C15-C16  | 1.408(3) |
| C16-C17  | 1.393(3) | C16-C20  | 1.500(3) |
| C17-C18  | 1.406(3) | C18-C19  | 1.375(3) |
| C18-C22  | 1.476(3) | C19-H19  | 0.98(2)  |
| C21-H21A | 0.96     | C21-H21B | 0.96     |
| C21-H21C | 0.96     | C23-H23A | 0.96     |
| C23-H23B | 0.96     | C23-H23C | 0.96     |

**Table S6.** Bond angles (°) for **12**.

|             |            |             |            |
|-------------|------------|-------------|------------|
| C5-N1-C9    | 118.8(2)   | C5-N1-C1    | 117.6(2)   |
| C9-N1-C1    | 116.8(2)   | C13-O1-C12  | 122.32(17) |
| C17-O3-H3   | 104.4(17)  | C20-O5-C21  | 116.72(19) |
| C22-O7-C23  | 115.7(2)   | N1-C1-C2    | 112.1(2)   |
| N1-C1-H1A   | 102.2(18)  | C2-C1-H1A   | 113.6(18)  |
| N1-C1-H1B   | 110.9(19)  | C2-C1-H1B   | 108.8(19)  |
| H1A-C1-H1B  | 109.(3)    | C1-C2-C3    | 110.6(3)   |
| C1-C2-H2A   | 107.3(16)  | C3-C2-H2A   | 111.0(16)  |
| C1-C2-H2B   | 108.8(15)  | C3-C2-H2B   | 110.8(15)  |
| H2A-C2-H2B  | 108.(2)    | C2-C3-C4    | 112.7(2)   |
| C2-C3-H3A   | 113.8(18)  | C4-C3-H3A   | 107.4(18)  |
| C2-C3-H3B   | 113.8(19)  | C4-C3-H3B   | 107.4(18)  |
| H3A-C3-H3B  | 101.(3)    | C10-C4-C5   | 119.56(19) |
| C10-C4-C3   | 119.5(2)   | C5-C4-C3    | 121.0(2)   |
| N1-C5-C4    | 120.84(19) | N1-C5-C6    | 120.0(2)   |
| C4-C5-C6    | 119.16(19) | C12-C6-C5   | 118.2(2)   |
| C12-C6-C7   | 120.25(19) | C5-C6-C7    | 121.5(2)   |
| C8-C7-C6    | 113.0(2)   | C8-C7-H7A   | 108.1(19)  |
| C6-C7-H7A   | 111.(2)    | C8-C7-H7B   | 109.0(19)  |
| C6-C7-H7B   | 112.0(19)  | H7A-C7-H7B  | 103.(3)    |
| C9-C8-C7    | 115.2(3)   | C9-C8-H8A   | 108.5      |
| C7-C8-H8A   | 108.5      | C9-C8-H8B   | 108.5      |
| C7-C8-H8B   | 108.5      | H8A-C8-H8B  | 107.5      |
| N1-C9-C8    | 113.1(2)   | N1-C9-H9A   | 109.0      |
| C8-C9-H9A   | 109.0      | N1-C9-H9B   | 109.0      |
| C8-C9-H9B   | 109.0      | H9A-C9-H9B  | 107.8      |
| C4-C10-C11  | 123.4(2)   | C4-C10-H10  | 115.0(14)  |
| C11-C10-H10 | 121.5(14)  | C12-C11-C10 | 114.99(19) |
| C12-C11-C15 | 119.07(17) | C10-C11-C15 | 125.9(2)   |

|               |            |               |            |
|---------------|------------|---------------|------------|
| C6-C12-O1     | 113.74(18) | C6-C12-C11    | 124.53(18) |
| O1-C12-C11    | 121.73(18) | O2-C13-O1     | 116.56(19) |
| O2-C13-C14    | 125.79(19) | O1-C13-C14    | 117.63(17) |
| C19-C14-C15   | 121.01(19) | C19-C14-C13   | 117.17(18) |
| C15-C14-C13   | 121.80(17) | C16-C15-C14   | 117.22(18) |
| C16-C15-C11   | 125.66(18) | C14-C15-C11   | 117.12(18) |
| C17-C16-C15   | 120.82(18) | C17-C16-C20   | 114.90(19) |
| C15-C16-C20   | 124.26(18) | O3-C17-C16    | 117.33(19) |
| O3-C17-C18    | 121.62(19) | C16-C17-C18   | 121.0(2)   |
| C19-C18-C17   | 118.28(19) | C19-C18-C22   | 122.8(2)   |
| C17-C18-C22   | 118.9(2)   | C18-C19-C14   | 121.59(19) |
| C18-C19-H19   | 122.0(12)  | C14-C19-H19   | 116.4(12)  |
| O4-C20-O5     | 124.6(2)   | O4-C20-C16    | 124.9(2)   |
| O5-C20-C16    | 110.47(18) | O5-C21-H21A   | 109.5      |
| O5-C21-H21B   | 109.5      | H21A-C21-H21B | 109.5      |
| O5-C21-H21C   | 109.5      | H21A-C21-H21C | 109.5      |
| H21B-C21-H21C | 109.5      | O6-C22-O7     | 123.0(2)   |
| O6-C22-C18    | 123.4(2)   | O7-C22-C18    | 113.6(2)   |
| O7-C23-H23A   | 109.5      | O7-C23-H23B   | 109.5      |
| H23A-C23-H23B | 109.5      | O7-C23-H23C   | 109.5      |
| H23A-C23-H23C | 109.5      | H23B-C23-H23C | 109.5      |

**Table S7.** Torsion angles (°) for **12**.

|                |             |                |            |
|----------------|-------------|----------------|------------|
| C5-N1-C1-C2    | 42.9(4)     | C9-N1-C1-C2    | -166.2(3)  |
| N1-C1-C2-C3    | -58.2(4)    | C1-C2-C3-C4    | 44.2(4)    |
| C2-C3-C4-C10   | 164.4(3)    | C2-C3-C4-C5    | -16.2(4)   |
| C9-N1-C5-C4    | -163.7(2)   | C1-N1-C5-C4    | -13.4(3)   |
| C9-N1-C5-C6    | 18.1(3)     | C1-N1-C5-C6    | 168.3(2)   |
| C10-C4-C5-N1   | 179.2(2)    | C3-C4-C5-N1    | -0.1(3)    |
| C10-C4-C5-C6   | -2.5(3)     | C3-C4-C5-C6    | 178.1(2)   |
| N1-C5-C6-C12   | -179.4(2)   | C4-C5-C6-C12   | 2.3(3)     |
| N1-C5-C6-C7    | 0.2(3)      | C4-C5-C6-C7    | -178.0(2)  |
| C12-C6-C7-C8   | -173.4(3)   | C5-C6-C7-C8    | 6.9(4)     |
| C6-C7-C8-C9    | -31.8(4)    | C5-N1-C9-C8    | -43.1(4)   |
| C1-N1-C9-C8    | 166.4(3)    | C7-C8-C9-N1    | 49.8(4)    |
| C5-C4-C10-C11  | -0.1(3)     | C3-C4-C10-C11  | 179.3(2)   |
| C4-C10-C11-C12 | 2.8(3)      | C4-C10-C11-C15 | -177.4(2)  |
| C5-C6-C12-O1   | -179.19(18) | C7-C6-C12-O1   | 1.1(3)     |
| C5-C6-C12-C11  | 0.5(3)      | C7-C6-C12-C11  | -179.1(2)  |
| C13-O1-C12-C6  | 177.40(19)  | C13-O1-C12-C11 | -2.3(3)    |
| C10-C11-C12-C6 | -3.0(3)     | C15-C11-C12-C6 | 177.2(2)   |
| C10-C11-C12-O1 | 176.71(19)  | C15-C11-C12-O1 | -3.1(3)    |
| C12-O1-C13-O2  | -176.7(2)   | C12-O1-C13-C14 | 4.5(3)     |
| O2-C13-C14-C19 | -1.6(3)     | O1-C13-C14-C19 | 177.10(19) |

|                 |             |                 |             |
|-----------------|-------------|-----------------|-------------|
| O2-C13-C14-C15  | -179.9(2)   | O1-C13-C14-C15  | -1.2(3)     |
| C19-C14-C15-C16 | -2.0(3)     | C13-C14-C15-C16 | 176.32(19)  |
| C19-C14-C15-C11 | 177.85(19)  | C13-C14-C15-C11 | -3.9(3)     |
| C12-C11-C15-C16 | -174.23(19) | C10-C11-C15-C16 | 6.0(3)      |
| C12-C11-C15-C14 | 6.0(3)      | C10-C11-C15-C14 | -173.8(2)   |
| C14-C15-C16-C17 | 0.9(3)      | C11-C15-C16-C17 | -178.9(2)   |
| C14-C15-C16-C20 | -177.24(19) | C11-C15-C16-C20 | 3.0(3)      |
| C15-C16-C17-O3  | -178.59(19) | C20-C16-C17-O3  | -0.3(3)     |
| C15-C16-C17-C18 | 1.1(3)      | C20-C16-C17-C18 | 179.4(2)    |
| O3-C17-C18-C19  | 177.6(2)    | C16-C17-C18-C19 | -2.0(3)     |
| O3-C17-C18-C22  | -3.3(3)     | C16-C17-C18-C22 | 177.1(2)    |
| C17-C18-C19-C14 | 1.0(3)      | C22-C18-C19-C14 | -178.1(2)   |
| C15-C14-C19-C18 | 1.0(3)      | C13-C14-C19-C18 | -177.3(2)   |
| C21-O5-C20-O4   | 4.9(3)      | C21-O5-C20-C16  | -175.93(19) |
| C17-C16-C20-O4  | 81.0(3)     | C15-C16-C20-O4  | -100.7(3)   |
| C17-C16-C20-O5  | -98.1(2)    | C15-C16-C20-O5  | 80.2(3)     |
| C23-O7-C22-O6   | -4.6(4)     | C23-O7-C22-C18  | 174.9(2)    |
| C19-C18-C22-O6  | 176.8(2)    | C17-C18-C22-O6  | -2.3(4)     |
| C19-C18-C22-O7  | -2.7(3)     | C17-C18-C22-O7  | 178.2(2)    |

**Table S8.** Anisotropic atomic displacement parameters ( $\text{\AA}^2$ ) for **12**. The anisotropic atomic displacement factor exponent takes the form:  $-2\pi^2 [ h^2 a^{*2} U_{11} + \dots + 2 h k a^* b^* U_{12} ]$

|     | $U_{11}$   | $U_{22}$   | $U_{33}$   | $U_{23}$    | $U_{13}$   | $U_{12}$    |
|-----|------------|------------|------------|-------------|------------|-------------|
| N1  | 0.0406(10) | 0.0441(12) | 0.0659(14) | 0.0033(11)  | 0.0139(9)  | -0.0097(8)  |
| O1  | 0.0297(7)  | 0.0482(9)  | 0.0505(10) | 0.0159(8)   | 0.0039(7)  | 0.0018(6)   |
| O2  | 0.0299(8)  | 0.0651(11) | 0.0631(11) | 0.0227(9)   | 0.0001(7)  | 0.0034(7)   |
| O3  | 0.0484(10) | 0.0705(12) | 0.0493(10) | 0.0254(10)  | 0.0039(8)  | -0.0008(9)  |
| O4  | 0.0514(10) | 0.0502(11) | 0.0725(13) | 0.0008(10)  | -0.0022(9) | 0.0149(8)   |
| O5  | 0.0397(8)  | 0.0566(10) | 0.0448(9)  | -0.0050(9)  | -0.0068(7) | 0.0010(7)   |
| O6  | 0.0534(10) | 0.0658(12) | 0.0614(11) | 0.0255(10)  | 0.0142(8)  | -0.0031(8)  |
| O7  | 0.0361(8)  | 0.0679(12) | 0.0637(11) | 0.0178(10)  | 0.0065(8)  | -0.0126(8)  |
| C1  | 0.0414(14) | 0.068(2)   | 0.091(2)   | -0.0046(19) | 0.0163(14) | -0.0207(13) |
| C2  | 0.0343(13) | 0.084(2)   | 0.0692(19) | -0.0005(18) | 0.0073(12) | -0.0056(13) |
| C3  | 0.0299(11) | 0.072(2)   | 0.0597(18) | 0.0020(16)  | 0.0019(11) | -0.0039(11) |
| C4  | 0.0312(10) | 0.0423(13) | 0.0420(13) | -0.0067(11) | 0.0038(9)  | -0.0038(9)  |
| C5  | 0.0355(11) | 0.0342(12) | 0.0464(13) | -0.0087(11) | 0.0102(10) | -0.0077(9)  |
| C6  | 0.0360(11) | 0.0335(12) | 0.0420(13) | -0.0006(10) | 0.0084(9)  | -0.0007(9)  |
| C7  | 0.0500(14) | 0.0473(15) | 0.0545(16) | 0.0124(14)  | 0.0124(13) | 0.0041(12)  |
| C8  | 0.0664(19) | 0.093(2)   | 0.111(3)   | 0.055(2)    | 0.0226(18) | 0.0008(17)  |
| C9  | 0.0626(17) | 0.0553(17) | 0.100(2)   | 0.0191(18)  | 0.0196(16) | -0.0132(14) |
| C10 | 0.0313(10) | 0.0439(13) | 0.0364(12) | -0.0001(11) | 0.0008(9)  | 0.0016(9)   |
| C11 | 0.0285(10) | 0.0358(12) | 0.0357(12) | -0.0021(10) | 0.0034(8)  | -0.0001(8)  |
| C12 | 0.0286(10) | 0.0350(12) | 0.0386(12) | -0.0013(10) | 0.0026(9)  | 0.0014(8)   |
| C13 | 0.0296(10) | 0.0380(12) | 0.0417(12) | 0.0037(11)  | 0.0052(9)  | 0.0003(9)   |
| C14 | 0.0303(10) | 0.0324(11) | 0.0318(11) | -0.0016(10) | 0.0036(8)  | -0.0007(8)  |



|     | U <sub>11</sub> | U <sub>22</sub> | U <sub>33</sub> | U <sub>23</sub> | U <sub>13</sub> | U <sub>12</sub> |
|-----|-----------------|-----------------|-----------------|-----------------|-----------------|-----------------|
| C15 | 0.0295(10)      | 0.0328(11)      | 0.0315(11)      | -0.0048(10)     | 0.0029(8)       | 0.0001(8)       |
| C16 | 0.0336(10)      | 0.0372(12)      | 0.0334(11)      | -0.0011(10)     | 0.0012(9)       | 0.0020(9)       |
| C17 | 0.0418(11)      | 0.0400(12)      | 0.0322(12)      | 0.0047(11)      | 0.0049(9)       | 0.0009(9)       |
| C18 | 0.0363(11)      | 0.0379(12)      | 0.0373(12)      | 0.0004(11)      | 0.0076(9)       | -0.0026(9)      |
| C19 | 0.0304(10)      | 0.0375(12)      | 0.0379(12)      | -0.0028(10)     | 0.0022(9)       | -0.0001(9)      |
| C20 | 0.0379(11)      | 0.0413(13)      | 0.0385(12)      | 0.0068(11)      | 0.0038(9)       | 0.0008(10)      |
| C21 | 0.0457(14)      | 0.080(2)        | 0.0594(17)      | 0.0042(16)      | -0.0169(12)     | -0.0061(13)     |
| C22 | 0.0425(12)      | 0.0440(13)      | 0.0432(14)      | 0.0039(12)      | 0.0086(10)      | -0.0035(10)     |
| C23 | 0.0462(15)      | 0.108(3)        | 0.094(2)        | 0.034(2)        | 0.0067(15)      | -0.0303(16)     |

**Table S9.** Hydrogen atomic coordinates and isotropic atomic displacement parameters (Å<sup>2</sup>) for **12**.

|      | x/a        | y/b      | z/c         | U(eq)     |
|------|------------|----------|-------------|-----------|
| H8A  | 0.6568     | 0.8888   | -0.1710     | 0.107     |
| H8B  | 0.6195     | 1.0319   | -0.1471     | 0.107     |
| H9A  | 0.8136     | 0.9883   | -0.1077     | 0.086     |
| H9B  | 0.7501     | 1.0341   | -0.0366     | 0.086     |
| H21A | 0.7632     | 0.4395   | 0.3513      | 0.097     |
| H21B | 0.7633     | 0.5937   | 0.3685      | 0.097     |
| H21C | 0.8087     | 0.5396   | 0.2913      | 0.097     |
| H23A | 0.0067     | 0.2119   | 0.1949      | 0.125     |
| H23B | -0.0812    | 0.3223   | 0.1586      | 0.125     |
| H23C | -0.0227    | 0.3313   | 0.2489      | 0.125     |
| H10  | 0.707(2)   | 0.539(3) | 0.1413(15)  | 0.054(7)  |
| H19  | 0.1821(18) | 0.532(2) | 0.0856(12)  | 0.036(6)  |
| H1A  | 0.957(3)   | 0.877(3) | -0.0349(18) | 0.083(10) |
| H2A  | 1.036(2)   | 0.709(3) | 0.0601(16)  | 0.064(8)  |
| H3A  | 0.901(3)   | 0.684(3) | 0.148(2)    | 0.087(10) |
| H3B  | 0.891(3)   | 0.550(4) | 0.102(2)    | 0.091(11) |
| H7A  | 0.511(3)   | 0.956(3) | -0.0652(19) | 0.086(10) |
| H2B  | 0.951(2)   | 0.641(3) | -0.0168(18) | 0.070(9)  |
| H7B  | 0.496(3)   | 0.846(3) | -0.1249(19) | 0.080(10) |
| H1B  | 0.930(3)   | 0.906(4) | 0.060(2)    | 0.110(12) |
| H3   | 0.349(3)   | 0.292(3) | 0.2888(17)  | 0.074(9)  |

**Table S10.** Hydrogen bond distances (Å) and angles (°) for **12**.

|               | Donor-H | Acceptor-H | Donor-Acceptor | Angle   |
|---------------|---------|------------|----------------|---------|
| O3-H3...O6    | 0.95(3) | 1.69(3)    | 2.574(2)       | 152.(3) |
| C2-H2B...O7   | 1.06(3) | 2.57(3)    | 3.521(4)       | 149.(2) |
| C23-H23A...O5 | 0.96    | 2.5        | 3.115(3)       | 121.4   |

## Crystal Structure Report for 13

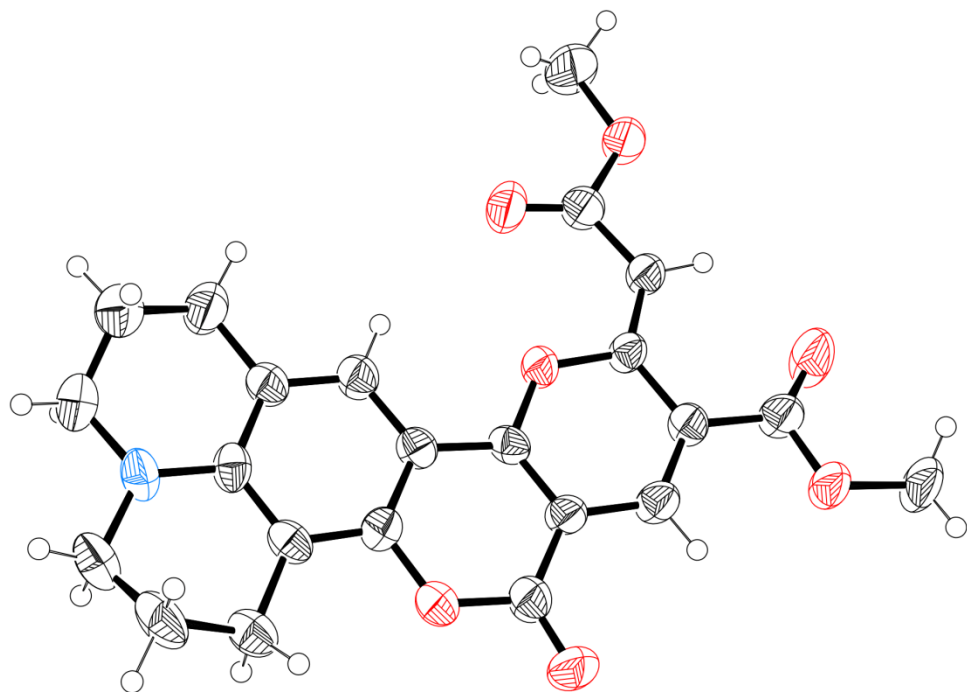

**Figure S4.** The ORTEP drawing<sup>4</sup> of X-ray diffraction analysis for compound **13**. CCDC 2125096.

A red needle-like specimen of  $C_{23}H_{21}NO_7$ , approximate dimensions 0.093 mm x 0.118 mm x 0.654 mm, was used for the X-ray crystallographic analysis. The X-ray intensity data were measured.

**Table S11.** Data collection details for **13**.

| Axis  | dx/mm  | 2 $\theta$ /° | $\omega$ /° | $\phi$ /° | $\chi$ /° | Width/° | Fra-mes | Time/s | Wave-length/Å | Volta-ge/kV | Current/mA | Tempe-<br>rature/K |
|-------|--------|---------------|-------------|-----------|-----------|---------|---------|--------|---------------|-------------|------------|--------------------|
| Omega | 39.875 | -99.52        | -196.16     | 0.05      | 26.30     | 1.60    | 68      | 24.00  | 1.54184       | 45          | 30.0       | n/a                |
| Omega | 39.875 | -100.83       | -210.20     | -187.67   | 52.45     | 1.60    | 72      | 24.00  | 1.54184       | 45          | 30.0       | n/a                |
| Omega | 39.875 | -100.46       | -106.07     | 105.38    | -57.83    | 1.60    | 74      | 24.00  | 1.54184       | 45          | 30.0       | n/a                |

| Axis  | dx/mm  | 2θ/°    | ω/°     | φ/°     | χ/°    | Width/° | Fra-mes | Time/s | Wave-length/Å | Volta-ge/kV | Current/mA | Tempe-<br>rature/K |
|-------|--------|---------|---------|---------|--------|---------|---------|--------|---------------|-------------|------------|--------------------|
| Omega | 39.875 | -100.80 | -200.04 | -257.00 | 32.48  | 1.60    | 68      | 24.00  | 1.54184       | 45          | 30.0       | n/a                |
| Omega | 39.875 | -101.00 | -203.00 | -126.64 | 37.78  | 1.60    | 69      | 24.00  | 1.54184       | 45          | 30.0       | n/a                |
| Omega | 39.875 | 39.67   | -326.19 | 270.00  | -54.74 | 1.60    | 73      | 24.00  | 1.54184       | 45          | 30.0       | n/a                |
| Omega | 39.875 | -99.90  | -197.24 | -57.68  | 27.86  | 1.60    | 68      | 24.00  | 1.54184       | 45          | 30.0       | n/a                |
| Omega | 39.875 | 44.78   | -38.43  | 75.16   | 69.29  | 1.60    | 55      | 24.00  | 1.54184       | 45          | 30.0       | n/a                |
| Phi   | 39.875 | 85.61   | -280.32 | 0.00    | -58.06 | 1.60    | 225     | 24.00  | 1.54184       | 45          | 30.0       | n/a                |
| Omega | 39.875 | -97.67  | -103.69 | -113.67 | -56.62 | 1.60    | 74      | 24.00  | 1.54184       | 45          | 30.0       | n/a                |
| Omega | 39.875 | 39.67   | -326.19 | 90.00   | -54.74 | 1.60    | 73      | 24.00  | 1.54184       | 45          | 30.0       | n/a                |
| Omega | 39.875 | -94.23  | -62.72  | 37.64   | -80.63 | 1.60    | 62      | 24.00  | 1.54184       | 45          | 30.0       | n/a                |
| Omega | 39.875 | 39.67   | -326.19 | 0.00    | -54.74 | 1.60    | 73      | 24.00  | 1.54184       | 45          | 30.0       | n/a                |
| Omega | 39.875 | -100.72 | -200.75 | 42.15   | 34.55  | 1.60    | 68      | 24.00  | 1.54184       | 45          | 30.0       | n/a                |
| Omega | 39.875 | 39.67   | -326.19 | 180.00  | -54.74 | 1.60    | 73      | 24.00  | 1.54184       | 45          | 30.0       | n/a                |
| Omega | 39.875 | -96.19  | -196.73 | -227.77 | 35.95  | 1.60    | 68      | 24.00  | 1.54184       | 45          | 30.0       | n/a                |
| Omega | 39.875 | -100.83 | -106.04 | 47.01   | -58.93 | 1.60    | 74      | 24.00  | 1.54184       | 45          | 30.0       | n/a                |
| Omega | 39.875 | 82.64   | -36.62  | -58.22  | 77.11  | 1.60    | 63      | 24.00  | 1.54184       | 45          | 30.0       | n/a                |
| Omega | 39.875 | -100.85 | -110.62 | 134.78  | -31.95 | 1.60    | 68      | 24.00  | 1.54184       | 45          | 30.0       | n/a                |
| Omega | 39.875 | -99.90  | -202.81 | -86.05  | 40.42  | 1.60    | 69      | 24.00  | 1.54184       | 45          | 30.0       | n/a                |
| Omega | 39.875 | -101.52 | -208.03 | 75.65   | 46.31  | 1.60    | 71      | 24.00  | 1.54184       | 45          | 30.0       | n/a                |
| Omega | 39.875 | -100.86 | -210.38 | -164.63 | 52.92  | 1.60    | 72      | 24.00  | 1.54184       | 45          | 30.0       | n/a                |
| Omega | 39.875 | 69.67   | -296.19 | 0.00    | -54.74 | 1.60    | 73      | 24.00  | 1.54184       | 45          | 30.0       | n/a                |
| Omega | 39.875 | -100.21 | -75.75  | -33.75  | -65.22 | 1.60    | 58      | 24.00  | 1.54184       | 45          | 30.0       | n/a                |
| Omega | 39.875 | 69.67   | -296.19 | 90.00   | -54.74 | 1.60    | 73      | 24.00  | 1.54184       | 45          | 30.0       | n/a                |
| Phi   | 39.875 | 70.61   | -295.32 | 0.00    | -58.06 | 1.60    | 225     | 24.00  | 1.54184       | 45          | 30.0       | n/a                |
| Omega | 39.875 | -91.39  | -190.44 | -37.93  | 31.98  | 1.60    | 68      | 24.00  | 1.54184       | 45          | 30.0       | n/a                |
| Omega | 39.875 | 93.00   | -382.07 | 7.02    | 62.00  | 1.60    | 75      | 24.00  | 1.54184       | 45          | 30.0       | n/a                |
| Omega | 39.875 | -98.85  | -106.83 | 44.61   | -38.97 | 1.60    | 69      | 24.00  | 1.54184       | 45          | 30.0       | n/a                |
| Omega | 39.875 | -2.62   | -113.72 | 270.00  | 54.74  | 1.60    | 73      | 24.00  | 1.54184       | 45          | 30.0       | n/a                |

| Axis  | dx/mm  | 2 $\theta$ /° | $\omega$ /° | $\phi$ /° | $\chi$ /° | Width/° | Fra-mes | Time/s | Wave-length/Å | Volta-ge/kV | Current/mA | Tempe-<br>rature/K |
|-------|--------|---------------|-------------|-----------|-----------|---------|---------|--------|---------------|-------------|------------|--------------------|
| Omega | 39.875 | 84.67         | -281.19     | 180.00    | -54.74    | 1.60    | 73      | 24.00  | 1.54184       | 45          | 30.0       | n/a                |
| Omega | 39.875 | 84.67         | -281.19     | 0.00      | -54.74    | 1.60    | 73      | 24.00  | 1.54184       | 45          | 30.0       | n/a                |
| Omega | 39.875 | 54.67         | -311.19     | 270.00    | -54.74    | 1.60    | 73      | 24.00  | 1.54184       | 45          | 30.0       | n/a                |
| Omega | 39.875 | -99.76        | -110.47     | -109.53   | -29.62    | 1.60    | 68      | 24.00  | 1.54184       | 45          | 30.0       | n/a                |
| Omega | 39.875 | 54.67         | -311.19     | 90.00     | -54.74    | 1.60    | 73      | 24.00  | 1.54184       | 45          | 30.0       | n/a                |
| Omega | 39.875 | 54.67         | -311.19     | 180.00    | -54.74    | 1.60    | 73      | 24.00  | 1.54184       | 45          | 30.0       | n/a                |
| Omega | 39.875 | 54.67         | -311.19     | 0.00      | -54.74    | 1.60    | 73      | 24.00  | 1.54184       | 45          | 30.0       | n/a                |
| Omega | 39.875 | 84.67         | -281.19     | 90.00     | -54.74    | 1.60    | 73      | 24.00  | 1.54184       | 45          | 30.0       | n/a                |
| Omega | 39.875 | 87.22         | -37.01      | -42.42    | 81.01     | 1.60    | 62      | 24.00  | 1.54184       | 45          | 30.0       | n/a                |
| Omega | 39.875 | 84.67         | -281.19     | 270.00    | -54.74    | 1.60    | 73      | 24.00  | 1.54184       | 45          | 30.0       | n/a                |
| Phi   | 39.875 | 55.61         | 49.69       | 0.00      | -58.06    | 1.60    | 225     | 24.00  | 1.54184       | 45          | 30.0       | n/a                |
| Omega | 39.875 | 27.38         | -337.68     | -105.00   | -54.74    | 1.60    | 72      | 24.00  | 1.54184       | 45          | 30.0       | n/a                |
| Phi   | 39.875 | -18.13        | -3.92       | 0.00      | 23.00     | 1.60    | 225     | 24.00  | 1.54184       | 45          | 30.0       | n/a                |
| Omega | 39.875 | 69.67         | -296.19     | 270.00    | -54.74    | 1.60    | 73      | 24.00  | 1.54184       | 45          | 30.0       | n/a                |
| Omega | 39.875 | 91.50         | -381.45     | -46.60    | 58.28     | 1.60    | 74      | 24.00  | 1.54184       | 45          | 30.0       | n/a                |
| Phi   | 39.875 | 43.16         | 28.95       | 0.00      | -23.00    | 1.60    | 225     | 24.00  | 1.54184       | 45          | 30.0       | n/a                |
| Phi   | 39.875 | -18.13        | -12.20      | 0.00      | 58.06     | 1.60    | 225     | 24.00  | 1.54184       | 45          | 30.0       | n/a                |
| Omega | 39.875 | 27.38         | -337.68     | -156.00   | -54.74    | 1.60    | 72      | 24.00  | 1.54184       | 45          | 30.0       | n/a                |
| Omega | 39.875 | 27.38         | -337.68     | -54.00    | -54.74    | 1.60    | 72      | 24.00  | 1.54184       | 45          | 30.0       | n/a                |
| Omega | 39.875 | 91.71         | -373.51     | -178.35   | 44.85     | 1.60    | 70      | 24.00  | 1.54184       | 45          | 30.0       | n/a                |
| Omega | 39.875 | 69.67         | -296.19     | 180.00    | -54.74    | 1.60    | 73      | 24.00  | 1.54184       | 45          | 30.0       | n/a                |
| Omega | 39.875 | 93.00         | -366.21     | 62.22     | 32.38     | 1.60    | 68      | 24.00  | 1.54184       | 45          | 30.0       | n/a                |
| Phi   | 39.875 | 40.61         | 34.69       | 0.00      | -58.06    | 1.60    | 225     | 24.00  | 1.54184       | 45          | 30.0       | n/a                |
| Omega | 39.875 | 27.38         | -337.68     | 0.00      | -54.74    | 1.60    | 72      | 24.00  | 1.54184       | 45          | 30.0       | n/a                |
| Omega | 39.875 | 27.38         | -337.68     | 153.00    | -54.74    | 1.60    | 72      | 24.00  | 1.54184       | 45          | 30.0       | n/a                |
| Phi   | 39.875 | 43.16         | 37.23       | 0.00      | -58.06    | 1.60    | 225     | 24.00  | 1.54184       | 45          | 30.0       | n/a                |
| Omega | 39.875 | -81.15        | -181.41     | -167.12   | 35.16     | 1.60    | 68      | 24.00  | 1.54184       | 45          | 30.0       | n/a                |

| Axis  | dx/mm  | 2 $\theta$ /° | $\omega$ /° | $\phi$ /° | $\chi$ /° | Width/° | Fra-mes | Time/s | Wave-length/Å | Volta-ge/kV | Current/mA | Tempe-rature/K |
|-------|--------|---------------|-------------|-----------|-----------|---------|---------|--------|---------------|-------------|------------|----------------|
| Omega | 39.875 | 27.38         | -337.68     | 51.00     | -54.74    | 1.60    | 72      | 24.00  | 1.54184       | 45          | 30.0       | n/a            |
| Omega | 39.875 | -2.62         | -113.72     | 0.00      | 54.74     | 1.60    | 73      | 24.00  | 1.54184       | 45          | 30.0       | n/a            |
| Omega | 39.875 | 27.38         | -337.68     | 102.00    | -54.74    | 1.60    | 72      | 24.00  | 1.54184       | 45          | 30.0       | n/a            |
| Omega | 39.875 | -2.62         | -113.72     | 90.00     | 54.74     | 1.60    | 73      | 24.00  | 1.54184       | 45          | 30.0       | n/a            |
| Omega | 39.875 | -2.62         | -113.72     | 180.00    | 54.74     | 1.60    | 73      | 24.00  | 1.54184       | 45          | 30.0       | n/a            |
| Omega | 39.875 | 12.38         | -353.48     | 0.00      | -54.74    | 1.60    | 73      | 24.00  | 1.54184       | 45          | 30.0       | n/a            |

A total of 5680 frames were collected. The total exposure time was 37.87 hours. The frames were integrated with the Bruker SAINT software package using a narrow-frame algorithm. The integration of the data using a monoclinic unit cell yielded a total of 45603 reflections to a maximum  $\theta$  angle of 66.19° (0.84 Å resolution), of which 3201 were independent (average redundancy 14.246, completeness = 91.9%,  $R_{int}$  = 14.21%,  $R_{sig}$  = 12.25%) and 1257 (39.27%) were greater than  $2\sigma(F_2)$ . The final cell constants of  $a = 11.3428(5)$  Å,  $b = 20.3876(9)$  Å,  $c = 8.5895(4)$  Å,  $\beta = 93.145(3)^\circ$ , volume = 1983.35(15) Å<sup>3</sup>, are based upon the refinement of the XYZ-centroids of 7323 reflections above  $20\sigma(I)$  with  $7.806^\circ < 2\theta < 111.6^\circ$ . Data were corrected for absorption effects using the multi-scan method (SADABS). The ratio of minimum to maximum apparent transmission was 0.772. The calculated minimum and maximum transmission coefficients (based on crystal size) are 0.5960 and 0.9220.

The structure was solved and refined using the Bruker SHELXTL Software Package, using the space group P 1 21/c 1, with  $Z = 4$  for the formula unit, C<sub>23</sub>H<sub>21</sub>NO<sub>7</sub>. The final anisotropic full-matrix least-squares refinement on F<sub>2</sub> with 283 variables converged at  $R_1 = 7.38\%$ , for the observed data and  $wR_2 = 23.70\%$  for all data. The goodness-of-fit was 0.989. The largest peak in the final difference electron density synthesis was 0.273 e-/Å<sup>3</sup> and the largest hole was -0.257 e-/Å<sup>3</sup> with an RMS deviation of 0.060 e-/Å<sup>3</sup>. On the basis of the final model, the calculated density was 1.418 g/cm<sup>3</sup> and  $F(000)$ , 888 e-.

**Table S12.** Sample and crystal data for **13**.

|                        |                                                 |                           |
|------------------------|-------------------------------------------------|---------------------------|
| Identification code    | KVy0615_10                                      |                           |
| Chemical formula       | C <sub>23</sub> H <sub>21</sub> NO <sub>7</sub> |                           |
| Formula weight         | 423.41 g/mol                                    |                           |
| Temperature            | 296(2) K                                        |                           |
| Wavelength             | 1.54178 Å                                       |                           |
| Crystal size           | 0.093 x 0.118 x 0.654 mm                        |                           |
| Crystal habit          | red needle                                      |                           |
| Crystal system         | monoclinic                                      |                           |
| Space group            | P 1 21/c 1                                      |                           |
| Unit cell dimensions   | $a = 11.3428(5)$ Å                              | $\alpha = 90^\circ$       |
|                        | $b = 20.3876(9)$ Å                              | $\beta = 93.145(3)^\circ$ |
|                        | $c = 8.5895(4)$ Å                               | $\gamma = 90^\circ$       |
| Volume                 | 1983.35(15) Å <sup>3</sup>                      |                           |
| Z                      | 4                                               |                           |
| Density (calculated)   | 1.418 g/cm <sup>3</sup>                         |                           |
| Absorption coefficient | 0.884 mm <sup>-1</sup>                          |                           |
| $F(000)$               | 888                                             |                           |

**Table S13.** Data collection and structure refinement for **13**.

|                                     |                                        |
|-------------------------------------|----------------------------------------|
| Theta range for data collection     | 3.90 to 66.19°                         |
| Index ranges                        | -12 ≤ h ≤ 12, -22 ≤ k ≤ 23, -9 ≤ l ≤ 9 |
| Reflections collected               | 45603                                  |
| Independent reflections             | 3201 [ $R_{int}$ ] = 0.1421]           |
| Coverage of independent reflections | 91.9%                                  |

|                                   |                                                                                                       |                           |
|-----------------------------------|-------------------------------------------------------------------------------------------------------|---------------------------|
| Absorption correction             | multi-scan                                                                                            |                           |
| Max. and min. transmission        | 0.9220 and 0.5960                                                                                     |                           |
| Structure solution technique      | direct methods                                                                                        |                           |
| Structure solution program        | SHELXL-2014 (Sheldrick, 2014)                                                                         |                           |
| Refinement method                 | Full-matrix least-squares on F <sup>2</sup>                                                           |                           |
| Refinement program                | SHELXL-2014 (Sheldrick, 2014)                                                                         |                           |
| Function minimized                | $\sum w(\text{Fo}^2 - \text{Fc}^2)^2$                                                                 |                           |
| Data / restraints / parameters    | 3201 / 0 / 283                                                                                        |                           |
| Goodness-of-fit on F <sup>2</sup> | 0.989                                                                                                 |                           |
| $\Delta/\sigma_{\text{max}}$      | 0.006                                                                                                 |                           |
| Final R indices                   | 1257 data; $l > 2\sigma(l)$                                                                           | R1 = 0.0738, wR2 = 0.1727 |
|                                   | all data                                                                                              | R1 = 0.2244, wR2 = 0.2370 |
| Weighting scheme                  | $w = 1/[\sigma^2(\text{Fo}^2) + (0.0977P)^2 + 1.3622P]$<br>where $P = (\text{Fo}^2 + 2\text{Fc}^2)/3$ |                           |
| Extinction coefficient            | 0.0002(1)                                                                                             |                           |
| Largest diff. peak and hole       | 0.273 and -0.257 eÅ <sup>-3</sup>                                                                     |                           |
| R.M.S. deviation from mean        | 0.060 eÅ <sup>-3</sup>                                                                                |                           |

**Table S14.** Atomic coordinates and equivalent isotropic atomic displacement parameters (Å<sup>2</sup>) for **13**. U(eq) is defined as one third of the trace of the orthogonalized U<sub>ij</sub> tensor.

|     | x/a       | y/b         | z/c       | U(eq)      |
|-----|-----------|-------------|-----------|------------|
| N1  | 0.0470(4) | 0.3526(2)   | 0.3296(5) | 0.0535(13) |
| O1  | 0.8548(3) | 0.15605(17) | 0.1646(4) | 0.0513(10) |
| O2  | 0.7813(3) | 0.06119(18) | 0.0827(4) | 0.0723(13) |
| O3  | 0.6111(3) | 0.25900(14) | 0.8953(4) | 0.0442(9)  |
| O4  | 0.5256(3) | 0.37712(17) | 0.8099(5) | 0.0805(14) |
| O5  | 0.3723(3) | 0.37069(16) | 0.6370(4) | 0.0668(12) |
| O6  | 0.3440(4) | 0.15007(18) | 0.6299(5) | 0.0871(15) |
| O7  | 0.4453(3) | 0.06125(17) | 0.6947(4) | 0.0679(12) |
| C1  | 0.0523(5) | 0.4238(3)   | 0.3430(7) | 0.0765(19) |
| C2  | 0.9991(6) | 0.4567(3)   | 0.2021(8) | 0.097(2)   |
| C3  | 0.8758(5) | 0.4335(3)   | 0.1653(7) | 0.0699(18) |
| C4  | 0.8695(4) | 0.3599(2)   | 0.1623(6) | 0.0457(14) |
| C5  | 0.9545(4) | 0.3217(3)   | 0.2509(6) | 0.0421(13) |
| C6  | 0.9487(4) | 0.2528(3)   | 0.2506(6) | 0.0413(13) |
| C7  | 0.0401(4) | 0.2123(2)   | 0.3416(6) | 0.0513(15) |
| C8  | 0.1558(4) | 0.2492(3)   | 0.3616(7) | 0.0655(17) |
| C9  | 0.1351(5) | 0.3165(3)   | 0.4257(7) | 0.0669(18) |
| C10 | 0.7817(4) | 0.3281(2)   | 0.0759(6) | 0.0458(14) |
| C11 | 0.7731(4) | 0.2596(2)   | 0.0732(6) | 0.0390(13) |
| C12 | 0.8576(4) | 0.2240(2)   | 0.1620(6) | 0.0423(14) |
| C13 | 0.6902(4) | 0.2230(3)   | 0.9827(5) | 0.0373(13) |
| C14 | 0.6871(4) | 0.1562(2)   | 0.9792(6) | 0.0420(14) |

|     | x/a       | y/b       | z/c       | U(eq)      |
|-----|-----------|-----------|-----------|------------|
| C15 | 0.7727(4) | 0.1203(3) | 0.0748(6) | 0.0493(15) |
| C16 | 0.5999(4) | 0.1252(2) | 0.8818(6) | 0.0462(14) |
| C17 | 0.5200(4) | 0.1599(2) | 0.7928(6) | 0.0410(13) |
| C18 | 0.5235(4) | 0.2310(2) | 0.7979(6) | 0.0386(14) |
| C19 | 0.4527(4) | 0.2732(2) | 0.7190(6) | 0.0436(14) |
| C20 | 0.4593(5) | 0.3437(3) | 0.7318(6) | 0.0500(15) |
| C21 | 0.3689(5) | 0.4415(3) | 0.6327(7) | 0.089(2)   |
| C22 | 0.4273(5) | 0.1257(3) | 0.6972(7) | 0.0514(15) |
| C23 | 0.3583(5) | 0.0224(2) | 0.6063(7) | 0.0743(19) |

**Table S15.** Bond lengths (Å) for **13**.

|          |          |          |          |
|----------|----------|----------|----------|
| N1-C5    | 1.369(6) | N1-C1    | 1.457(6) |
| N1-C9    | 1.460(6) | O1-C15   | 1.384(5) |
| O1-C12   | 1.385(5) | O2-C15   | 1.210(5) |
| O3-C13   | 1.354(5) | O3-C18   | 1.387(5) |
| O4-C20   | 1.194(5) | O5-C20   | 1.360(5) |
| O5-C21   | 1.444(6) | O6-C22   | 1.190(5) |
| O7-C22   | 1.330(5) | O7-C23   | 1.447(5) |
| C1-C2    | 1.483(7) | C1-H1A   | 0.97     |
| C1-H1B   | 0.97     | C2-C3    | 1.494(7) |
| C2-H2A   | 0.97     | C2-H2B   | 0.97     |
| C3-C4    | 1.504(6) | C3-H3A   | 0.97     |
| C3-H3B   | 0.97     | C4-C10   | 1.372(6) |
| C4-C5    | 1.426(6) | C5-C6    | 1.406(6) |
| C6-C12   | 1.381(6) | C6-C7    | 1.509(6) |
| C7-C8    | 1.514(6) | C7-H7A   | 0.97     |
| C7-H7B   | 0.97     | C8-C9    | 1.502(7) |
| C8-H8A   | 0.97     | C8-H8B   | 0.97     |
| C9-H9A   | 0.97     | C9-H9B   | 0.97     |
| C10-C11  | 1.400(6) | C10-H10  | 0.93     |
| C11-C12  | 1.396(6) | C11-C13  | 1.402(6) |
| C13-C14  | 1.363(6) | C14-C16  | 1.409(6) |
| C14-C15  | 1.437(6) | C16-C17  | 1.353(6) |
| C16-H16  | 0.93     | C17-C18  | 1.450(6) |
| C17-C22  | 1.474(7) | C18-C19  | 1.336(6) |
| C19-C20  | 1.443(6) | C19-H19  | 0.93     |
| C21-H21A | 0.96     | C21-H21B | 0.96     |
| C21-H21C | 0.96     | C23-H23A | 0.96     |
| C23-H23B | 0.96     | C23-H23C | 0.96     |

**Table S16.** Bond angles (°) for **13**.

|          |          |            |          |
|----------|----------|------------|----------|
| C5-N1-C1 | 121.6(5) | C5-N1-C9   | 122.0(5) |
| C1-N1-C9 | 115.7(5) | C15-O1-C12 | 122.2(4) |



|               |          |               |          |
|---------------|----------|---------------|----------|
| C13-O3-C18    | 122.8(4) | C20-O5-C21    | 115.9(4) |
| C22-O7-C23    | 116.7(4) | N1-C1-C2      | 111.9(5) |
| N1-C1-H1A     | 109.2    | C2-C1-H1A     | 109.2    |
| N1-C1-H1B     | 109.2    | C2-C1-H1B     | 109.2    |
| H1A-C1-H1B    | 107.9    | C1-C2-C3      | 111.3(5) |
| C1-C2-H2A     | 109.4    | C3-C2-H2A     | 109.4    |
| C1-C2-H2B     | 109.4    | C3-C2-H2B     | 109.4    |
| H2A-C2-H2B    | 108.0    | C2-C3-C4      | 111.2(5) |
| C2-C3-H3A     | 109.4    | C4-C3-H3A     | 109.4    |
| C2-C3-H3B     | 109.4    | C4-C3-H3B     | 109.4    |
| H3A-C3-H3B    | 108.0    | C10-C4-C5     | 118.8(5) |
| C10-C4-C3     | 120.8(5) | C5-C4-C3      | 120.4(5) |
| N1-C5-C6      | 119.6(5) | N1-C5-C4      | 119.3(5) |
| C6-C5-C4      | 120.9(5) | C12-C6-C5     | 117.4(5) |
| C12-C6-C7     | 121.6(5) | C5-C6-C7      | 121.0(5) |
| C6-C7-C8      | 110.7(4) | C6-C7-H7A     | 109.5    |
| C8-C7-H7A     | 109.5    | C6-C7-H7B     | 109.5    |
| C8-C7-H7B     | 109.5    | H7A-C7-H7B    | 108.1    |
| C9-C8-C7      | 110.0(5) | C9-C8-H8A     | 109.7    |
| C7-C8-H8A     | 109.7    | C9-C8-H8B     | 109.7    |
| C7-C8-H8B     | 109.7    | H8A-C8-H8B    | 108.2    |
| N1-C9-C8      | 111.7(4) | N1-C9-H9A     | 109.3    |
| C8-C9-H9A     | 109.3    | N1-C9-H9B     | 109.3    |
| C8-C9-H9B     | 109.3    | H9A-C9-H9B    | 107.9    |
| C4-C10-C11    | 121.8(5) | C4-C10-H10    | 119.1    |
| C11-C10-H10   | 119.1    | C12-C11-C10   | 117.7(5) |
| C12-C11-C13   | 116.4(5) | C10-C11-C13   | 125.8(5) |
| C6-C12-O1     | 115.7(5) | C6-C12-C11    | 123.3(5) |
| O1-C12-C11    | 120.9(5) | O3-C13-C14    | 121.0(4) |
| O3-C13-C11    | 114.9(5) | C14-C13-C11   | 124.1(5) |
| C13-C14-C16   | 118.5(4) | C13-C14-C15   | 118.7(5) |
| C16-C14-C15   | 122.8(5) | O2-C15-O1     | 116.3(5) |
| O2-C15-C14    | 126.1(5) | O1-C15-C14    | 117.6(5) |
| C17-C16-C14   | 121.8(4) | C17-C16-H16   | 119.1    |
| C14-C16-H16   | 119.1    | C16-C17-C18   | 119.3(5) |
| C16-C17-C22   | 120.1(5) | C18-C17-C22   | 120.5(5) |
| C19-C18-O3    | 115.6(4) | C19-C18-C17   | 127.8(5) |
| O3-C18-C17    | 116.6(4) | C18-C19-C20   | 125.2(5) |
| C18-C19-H19   | 117.4    | C20-C19-H19   | 117.4    |
| O4-C20-O5     | 121.3(5) | O4-C20-C19    | 129.8(5) |
| O5-C20-C19    | 109.0(5) | O5-C21-H21A   | 109.5    |
| O5-C21-H21B   | 109.5    | H21A-C21-H21B | 109.5    |
| O5-C21-H21C   | 109.5    | H21A-C21-H21C | 109.5    |
| H21B-C21-H21C | 109.5    | O6-C22-O7     | 121.5(5) |
| O6-C22-C17    | 126.7(5) | O7-C22-C17    | 111.8(5) |

|               |       |               |       |
|---------------|-------|---------------|-------|
| O7-C23-H23A   | 109.5 | O7-C23-H23B   | 109.5 |
| H23A-C23-H23B | 109.5 | O7-C23-H23C   | 109.5 |
| H23A-C23-H23C | 109.5 | H23B-C23-H23C | 109.5 |

**Table S17.** Torsion angles (°) for **13**.

|                 |           |                 |           |
|-----------------|-----------|-----------------|-----------|
| C5-N1-C1-C2     | -33.8(7)  | C9-N1-C1-C2     | 155.8(5)  |
| N1-C1-C2-C3     | 54.5(7)   | C1-C2-C3-C4     | -50.5(7)  |
| C2-C3-C4-C10    | -154.4(5) | C2-C3-C4-C5     | 26.2(7)   |
| C1-N1-C5-C6     | -175.3(5) | C9-N1-C5-C6     | -5.6(7)   |
| C1-N1-C5-C4     | 8.6(7)    | C9-N1-C5-C4     | 178.3(5)  |
| C10-C4-C5-N1    | 175.8(4)  | C3-C4-C5-N1     | -4.8(7)   |
| C10-C4-C5-C6    | -0.2(7)   | C3-C4-C5-C6     | 179.1(5)  |
| N1-C5-C6-C12    | -176.2(4) | C4-C5-C6-C12    | -0.2(7)   |
| N1-C5-C6-C7     | 2.6(7)    | C4-C5-C6-C7     | 178.7(4)  |
| C12-C6-C7-C8    | 152.5(5)  | C5-C6-C7-C8     | -26.3(6)  |
| C6-C7-C8-C9     | 51.4(6)   | C5-N1-C9-C8     | 32.4(7)   |
| C1-N1-C9-C8     | -157.3(5) | C7-C8-C9-N1     | -54.8(6)  |
| C5-C4-C10-C11   | 0.4(7)    | C3-C4-C10-C11   | -179.0(5) |
| C4-C10-C11-C12  | -0.1(7)   | C4-C10-C11-C13  | -176.7(5) |
| C5-C6-C12-O1    | 179.9(4)  | C7-C6-C12-O1    | 1.1(7)    |
| C5-C6-C12-C11   | 0.5(7)    | C7-C6-C12-C11   | -178.3(4) |
| C15-O1-C12-C6   | -176.4(4) | C15-O1-C12-C11  | 3.1(7)    |
| C10-C11-C12-C6  | -0.4(7)   | C13-C11-C12-C6  | 176.5(4)  |
| C10-C11-C12-O1  | -179.8(4) | C13-C11-C12-O1  | -2.9(7)   |
| C18-O3-C13-C14  | -0.2(7)   | C18-O3-C13-C11  | 179.4(4)  |
| C12-C11-C13-O3  | -178.6(4) | C10-C11-C13-O3  | -1.9(7)   |
| C12-C11-C13-C14 | 1.0(7)    | C10-C11-C13-C14 | 177.7(5)  |
| O3-C13-C14-C16  | 0.3(7)    | C11-C13-C14-C16 | -179.3(4) |
| O3-C13-C14-C15  | -179.7(4) | C11-C13-C14-C15 | 0.7(8)    |
| C12-O1-C15-O2   | 177.6(4)  | C12-O1-C15-C14  | -1.2(7)   |
| C13-C14-C15-O2  | -179.3(5) | C16-C14-C15-O2  | 0.7(8)    |
| C13-C14-C15-O1  | -0.6(7)   | C16-C14-C15-O1  | 179.4(4)  |
| C13-C14-C16-C17 | 0.0(7)    | C15-C14-C16-C17 | 180.0(5)  |
| C14-C16-C17-C18 | -0.3(7)   | C14-C16-C17-C22 | -177.6(5) |
| C13-O3-C18-C19  | -179.8(4) | C13-O3-C18-C17  | -0.1(6)   |
| C16-C17-C18-C19 | 180.0(5)  | C22-C17-C18-C19 | -2.7(8)   |
| C16-C17-C18-O3  | 0.4(7)    | C22-C17-C18-O3  | 177.7(4)  |
| O3-C18-C19-C20  | -1.8(7)   | C17-C18-C19-C20 | 178.6(5)  |
| C21-O5-C20-O4   | 2.4(8)    | C21-O5-C20-C19  | -178.2(4) |
| C18-C19-C20-O4  | 0.5(9)    | C18-C19-C20-O5  | -178.9(5) |
| C23-O7-C22-O6   | -0.1(8)   | C23-O7-C22-C17  | 178.9(4)  |
| C16-C17-C22-O6  | 169.9(6)  | C18-C17-C22-O6  | -7.4(9)   |
| C16-C17-C22-O7  | -9.1(7)   | C18-C17-C22-O7  | 173.6(4)  |

**Table S18.** Anisotropic atomic displacement parameters (Å<sup>2</sup>) for **13**. The anisotropic atomic displacement factor exponent takes the form:  $-2\pi^2[h^2 a^2 U_{11} + \dots + 2 h k a^* b^* U_{12}]$

|     | U11      | U22      | U33      | U23         | U13         | U12         |
|-----|----------|----------|----------|-------------|-------------|-------------|
| N1  | 0.042(3) | 0.062(3) | 0.055(3) | -0.005(3)   | -0.012(2)   | -0.009(3)   |
| O1  | 0.044(2) | 0.051(2) | 0.057(2) | 0.002(2)    | -0.0133(19) | 0.0024(19)  |
| O2  | 0.071(3) | 0.039(2) | 0.104(3) | 0.006(2)    | -0.028(2)   | 0.007(2)    |
| O3  | 0.036(2) | 0.039(2) | 0.055(2) | -0.0009(18) | -0.0126(18) | -0.0015(18) |
| O4  | 0.082(3) | 0.044(3) | 0.110(4) | -0.004(2)   | -0.047(3)   | -0.005(2)   |
| O5  | 0.061(3) | 0.041(2) | 0.093(3) | -0.001(2)   | -0.035(2)   | 0.009(2)    |
| O6  | 0.063(3) | 0.053(3) | 0.140(4) | -0.019(2)   | -0.052(3)   | 0.008(2)    |
| O7  | 0.061(3) | 0.040(2) | 0.098(3) | -0.001(2)   | -0.038(2)   | -0.007(2)   |
| C1  | 0.077(5) | 0.063(5) | 0.086(5) | -0.003(4)   | -0.022(4)   | -0.024(4)   |
| C2  | 0.093(5) | 0.072(5) | 0.119(6) | 0.023(4)    | -0.048(5)   | -0.026(4)   |
| C3  | 0.061(4) | 0.048(4) | 0.098(5) | -0.001(3)   | -0.020(4)   | -0.007(3)   |
| C4  | 0.038(3) | 0.048(3) | 0.051(4) | 0.001(3)    | -0.006(3)   | 0.004(3)    |
| C5  | 0.033(3) | 0.051(4) | 0.043(3) | -0.006(3)   | 0.005(3)    | -0.010(3)   |
| C6  | 0.031(3) | 0.055(4) | 0.038(3) | 0.003(3)    | 0.001(3)    | 0.005(3)    |
| C7  | 0.040(3) | 0.066(4) | 0.048(4) | 0.007(3)    | -0.001(3)   | 0.004(3)    |
| C8  | 0.031(3) | 0.099(5) | 0.065(4) | 0.011(4)    | -0.014(3)   | 0.000(3)    |
| C9  | 0.051(4) | 0.086(5) | 0.060(4) | -0.003(4)   | -0.020(3)   | 0.001(3)    |
| C10 | 0.037(3) | 0.046(4) | 0.053(4) | -0.002(3)   | -0.004(3)   | 0.003(3)    |
| C11 | 0.028(3) | 0.044(3) | 0.045(3) | 0.001(3)    | -0.001(3)   | 0.003(3)    |
| C12 | 0.041(4) | 0.039(3) | 0.047(4) | -0.002(3)   | 0.004(3)    | -0.003(3)   |
| C13 | 0.025(3) | 0.044(3) | 0.042(4) | 0.005(3)    | -0.002(3)   | 0.004(3)    |
| C14 | 0.034(3) | 0.037(3) | 0.054(4) | 0.005(3)    | -0.004(3)   | 0.000(3)    |
| C15 | 0.039(4) | 0.048(4) | 0.059(4) | -0.002(3)   | -0.007(3)   | 0.001(3)    |
| C16 | 0.037(3) | 0.037(3) | 0.064(4) | 0.002(3)    | -0.001(3)   | 0.000(3)    |
| C17 | 0.029(3) | 0.042(3) | 0.052(4) | -0.002(3)   | -0.003(3)   | 0.002(3)    |
| C18 | 0.030(3) | 0.035(3) | 0.050(4) | 0.000(3)    | -0.001(3)   | -0.003(3)   |
| C19 | 0.035(3) | 0.038(3) | 0.057(4) | 0.000(3)    | -0.009(3)   | 0.000(3)    |
| C20 | 0.042(4) | 0.046(4) | 0.061(4) | 0.002(3)    | -0.007(3)   | 0.004(3)    |
| C21 | 0.112(6) | 0.039(4) | 0.112(6) | -0.003(4)   | -0.034(4)   | 0.022(4)    |
| C22 | 0.039(4) | 0.042(4) | 0.072(4) | 0.001(3)    | -0.008(3)   | 0.005(3)    |
| C23 | 0.063(4) | 0.044(3) | 0.112(5) | -0.010(3)   | -0.030(4)   | -0.016(3)   |

**Table S19.** Hydrogen atomic coordinates and isotropic atomic displacement parameters (Å<sup>2</sup>) for **13**.

|     | x/a    | y/b    | z/c    | U(eq) |
|-----|--------|--------|--------|-------|
| H1A | 1.1340 | 0.4373 | 0.3590 | 0.092 |
| H1B | 1.0107 | 0.4374 | 0.4333 | 0.092 |
| H2A | 1.0468 | 0.4478 | 0.1141 | 0.116 |
| H2B | 0.9987 | 0.5038 | 0.2188 | 0.116 |
| H3A | 0.8477 | 0.4507 | 0.0647 | 0.084 |

|      | x/a    | y/b     | z/c     | U(eq) |
|------|--------|---------|---------|-------|
| H3B  | 0.8247 | 0.4501  | 0.2432  | 0.084 |
| H7A  | 1.0524 | 0.1715  | 0.2870  | 0.062 |
| H7B  | 1.0118 | 0.2019  | 0.4432  | 0.062 |
| H8A  | 1.2099 | 0.2253  | 0.4322  | 0.079 |
| H8B  | 1.1913 | 0.2528  | 0.2618  | 0.079 |
| H9A  | 1.1087 | 0.3126  | 0.5308  | 0.08  |
| H9B  | 1.2088 | 0.3407  | 0.4308  | 0.08  |
| H10  | 0.7263 | 0.3528  | 0.0174  | 0.055 |
| H16  | 0.5971 | 0.0796  | -0.1213 | 0.055 |
| H19  | 0.3946 | 0.2558  | -0.3496 | 0.052 |
| H21A | 0.4479 | 0.4583  | -0.3695 | 0.134 |
| H21B | 0.3329 | 0.4576  | -0.2762 | 0.134 |
| H21C | 0.3237 | 0.4556  | -0.4589 | 0.134 |
| H23A | 0.2900 | 0.0166  | -0.3339 | 0.112 |
| H23B | 0.3913 | -0.0197 | -0.4163 | 0.112 |
| H23C | 0.3359 | 0.0445  | -0.4895 | 0.112 |

**Table S20.** Hydrogen bond distances (Å) and angles (°) for **13**.

|               | Donor-H | Acceptor-H | Donor-Acceptor | Angle |
|---------------|---------|------------|----------------|-------|
| C23-H23B...O4 | 0.96    | 2.46       | 3.305(6)       | 146.6 |
| C19-H19...O6  | 0.93    | 2.24       | 2.882(6)       | 126.1 |
| C9-H9B...O5   | 0.97    | 2.57       | 3.350(6)       | 137.8 |

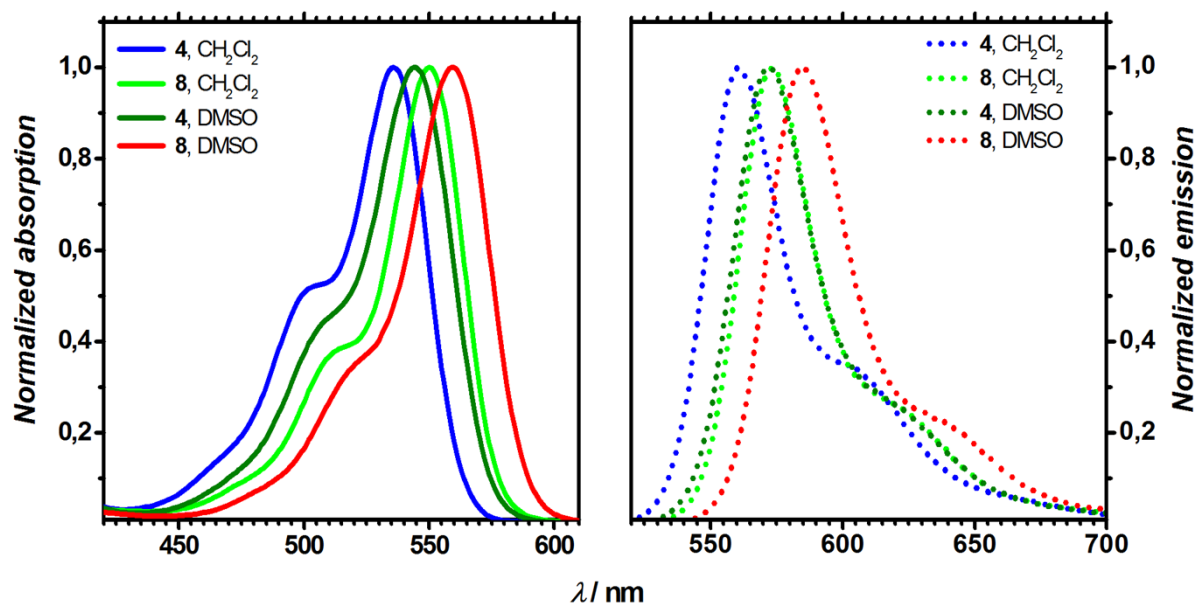

Figure S5. Absorption (solid) and emission (dotted) of compounds 4 and 23 in  $\text{CH}_2\text{Cl}_2$  and DMSO.

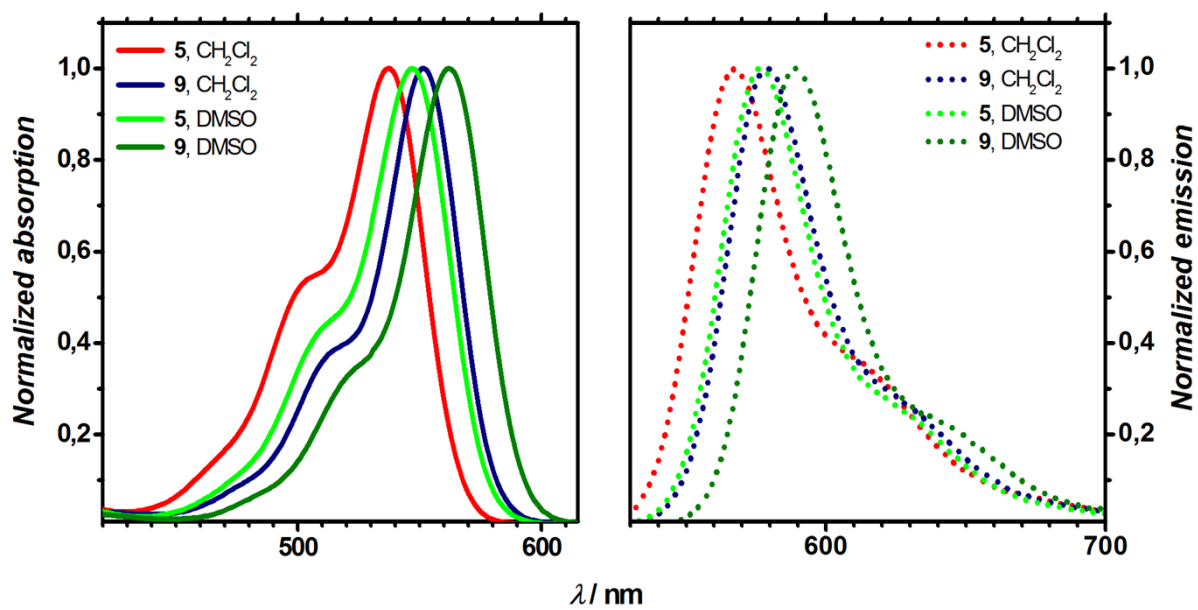

Figure S6. Absorption (solid) and emission (dotted) of compounds 5 and 9 in  $\text{CH}_2\text{Cl}_2$  and DMSO.

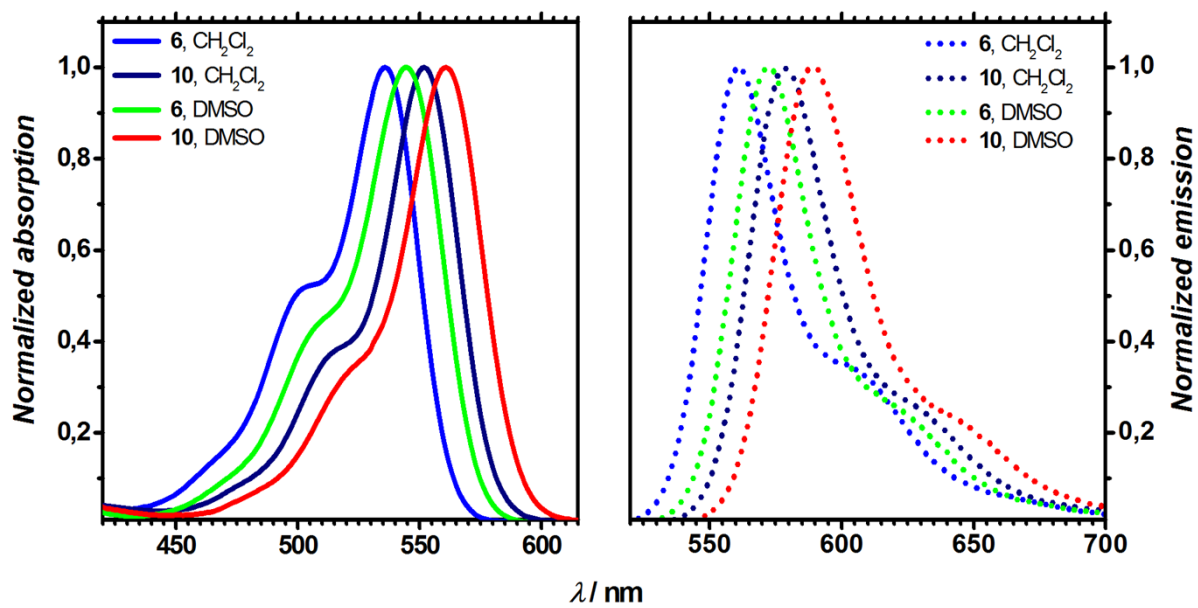

Figure S7. Absorption (solid) and emission (dotted) of compounds **6** and **10** in  $\text{CH}_2\text{Cl}_2$  and DMSO.

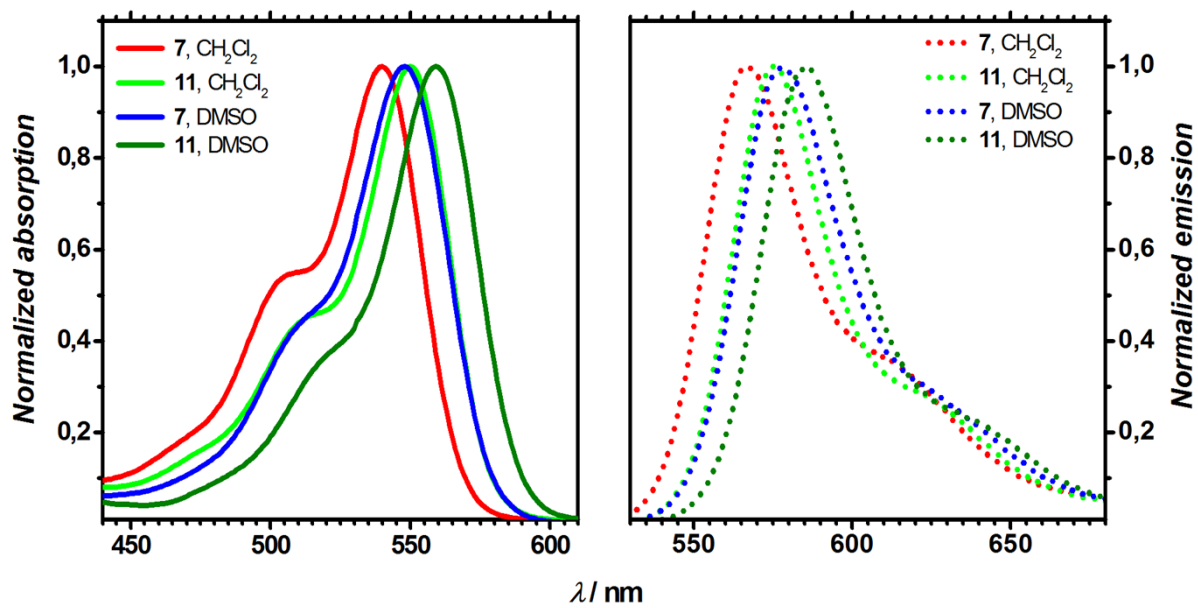

Figure S8. Absorption (solid) and emission (dotted) of compounds **7** and **11** in  $\text{CH}_2\text{Cl}_2$  and DMSO.

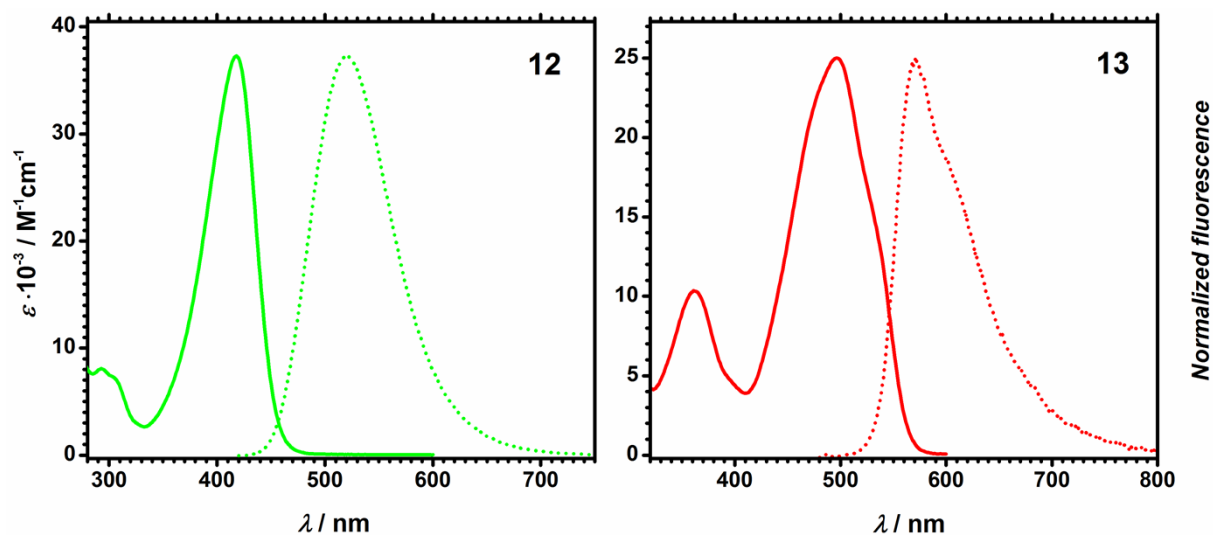

**Figure S9.** Absorption (solid) and emission (dotted) spectra for compounds **12** (in CH<sub>2</sub>Cl<sub>2</sub>) and **13** (in DMSO).

**Table S21.** The spectroscopic properties for compounds **12** and **13**.

| Dye                    | Solvent                         | $\lambda_{\text{abs}}^{\text{max}}$ [nm] | $\epsilon \cdot 10^{-3}$ [M <sup>-1</sup> cm <sup>-1</sup> ] | $\lambda_{\text{em}}^{\text{max}}$ [nm] | $\Delta\bar{\nu}$ [cm <sup>-1</sup> ] | $\Phi_{\text{fi}}$ |
|------------------------|---------------------------------|------------------------------------------|--------------------------------------------------------------|-----------------------------------------|---------------------------------------|--------------------|
| <b>12</b> <sup>a</sup> | CH <sub>2</sub> Cl <sub>2</sub> | 418                                      | 37                                                           | 520                                     | 4700                                  | 0.73               |
| <b>13</b>              | CH <sub>2</sub> Cl <sub>2</sub> | 491                                      | 32                                                           | – <sup>b</sup>                          |                                       |                    |
|                        | DMSO                            | 497                                      | 25                                                           | 571                                     | 2600                                  | 0.037              |

<sup>a</sup> – Compound **12** in DMSO does not show linear dependence of the absorption vs. concentration.

<sup>b</sup> – In the fluorescence spectrum compound **13** in CH<sub>2</sub>Cl<sub>2</sub> shows emission from two forms.

## Photostability measurements

Photostability was determined through the variation in absorption of each sample at the appropriate absorption maximum wavelength ( $\lambda_{\text{abs}}$ ) with respect to irradiation time. Ethanol was selected as the solvent. Concentrations giving similar optical densities ( $A \approx 1$ ) were used. Quartz cells of samples were irradiated with a 300 W Xe lamp (Asahi spectra MAX-350) for 120 min (for compounds **4-7** in DMSO), 50 min (for compounds **8-11** in DMSO) and 30 min for all dyes in DCM at 25 °C equipped with a UV/vis mirror module through a glass fiber. The absorption spectra were measured at appropriate times during the irradiation. **Rhodamine 6G**, **Fluorescein** and **Rdl12**<sup>5</sup> in appropriate solvents were used as references.

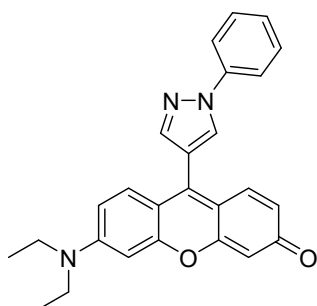

**Figure S10.** The structure of **Rdl12**.

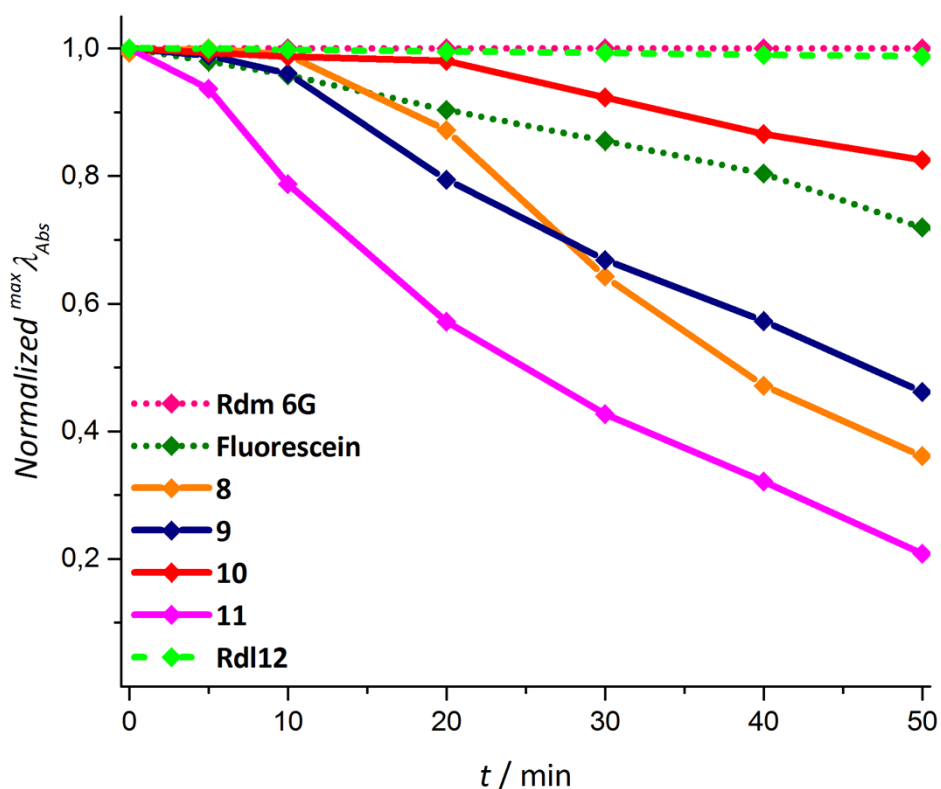

**Figure S11.** Photostability of rhodols **8-11** compared to the Rhodamine 6G in EtOH, fluorescein in 0,1M NaOH aqueous solution and **Rdl12** measured in DMSO using a collimated light source from a 300W Xe lamp.



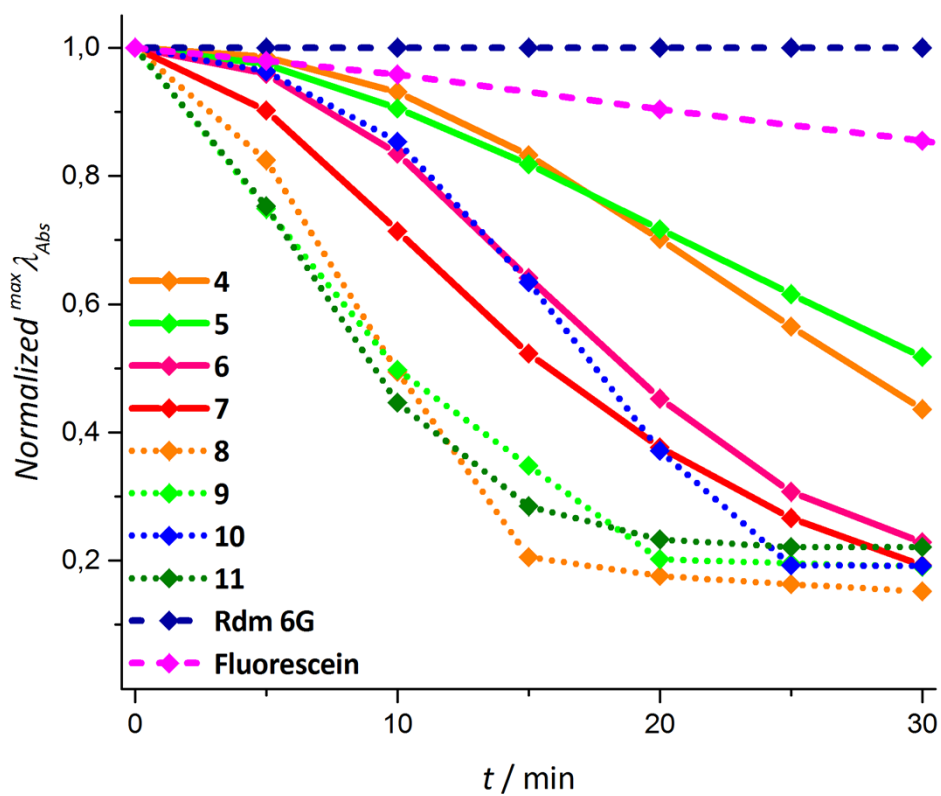

**Figure S12.** Photostability of rhodols **4-11** compared to the **Rhodamine 6G** in EtOH and **Fluorescein** in 0,1M NaOH aqueous solution measured in  $\text{CH}_2\text{Cl}_2$  using a collimated light source from a 300W Xe lamp.

## Theoretical methods

We have performed the DFT and TD-DFT calculations with the Gaussian 16 code<sup>6</sup> on all dyes. For **4**, we performed a conformational search on the side esters groups and only the most stable ones were used. Default Gaussian16 thresholds and algorithms were used but for an improved optimization threshold ( $10^{-5}$  au on average residual forces), a stricter self-consistent field convergence criterion ( $10^{-10}$  a.u.) and the use of the *ultrafine* DFT integration grid.

Firstly, the  $S_0$  geometries have been optimized with DFT and the vibrational frequencies have been analytically determined, using the M06-2X *meta*-GGA hybrid exchange-correlation functional.<sup>7</sup> These calculations were performed with the 6-311G(d,p) atomic basis set and account for solvent effects through the linear-response PCM approach considering DCM as solvent.<sup>8</sup> Secondly, starting from the optimal ground-state geometries, we have used TD-DFT with the same functional and basis set to optimize the  $S_1$  geometry and compute the vibrational frequencies. All optimized structures correspond to true minima of the potential energy surface. Thirdly, the vertical transition energies were determined with TD-DFT and the same functional, but a larger basis set, namely 6-311+G(2d,p), in gas-phase as well as in solution using the cLR<sup>2</sup> variant of the PCM,<sup>9</sup> in its *non-equilibrium* limit.

As the shortcomings of TD-DFT for cyanine derivatives<sup>10</sup> are known, the obtained transition energies were also computed using COSMO-ADC(2)<sup>11</sup> with the Turbomole 7.3 code.<sup>12</sup> These ADC(2) energies were calculated in gas phase applying the resolution of identity scheme, and using the *aug-cc-pVDZ* atomic basis set.

The vibrationally resolved spectrum were determined with the FCClasses 3 program.<sup>13,14</sup> We used a time-dependent formulation, applied the FC approximation (HT effects were neglected), and selected the so-called *Vertical Gradient*<sup>15</sup> vibronic model for the band topologies on the basis of the TD-DFT data only. We used a simulation temperature of 298K. The obtained stick spectrum were convoluted with Gaussian having HWHM of  $300\text{ cm}^{-1}$ . The radiative and internal conversion rates have been obtained using the TVCF formalism.<sup>16</sup> These calculations were made within the time-dependent formulation, the same FC approach and the *Vertical Gradient* model.<sup>15</sup> For the radiative part, we used the same broadening as for the band shapes, i.e., a  $300\text{ cm}^{-1}$  Gaussian, but this is known to be not important for the radiative rate.<sup>17</sup> For the IC part, we used a  $10\text{ cm}^{-1}$  broadening Lorentzian, which is a typical value in the literature.<sup>17,18</sup>

### Additional theoretical data

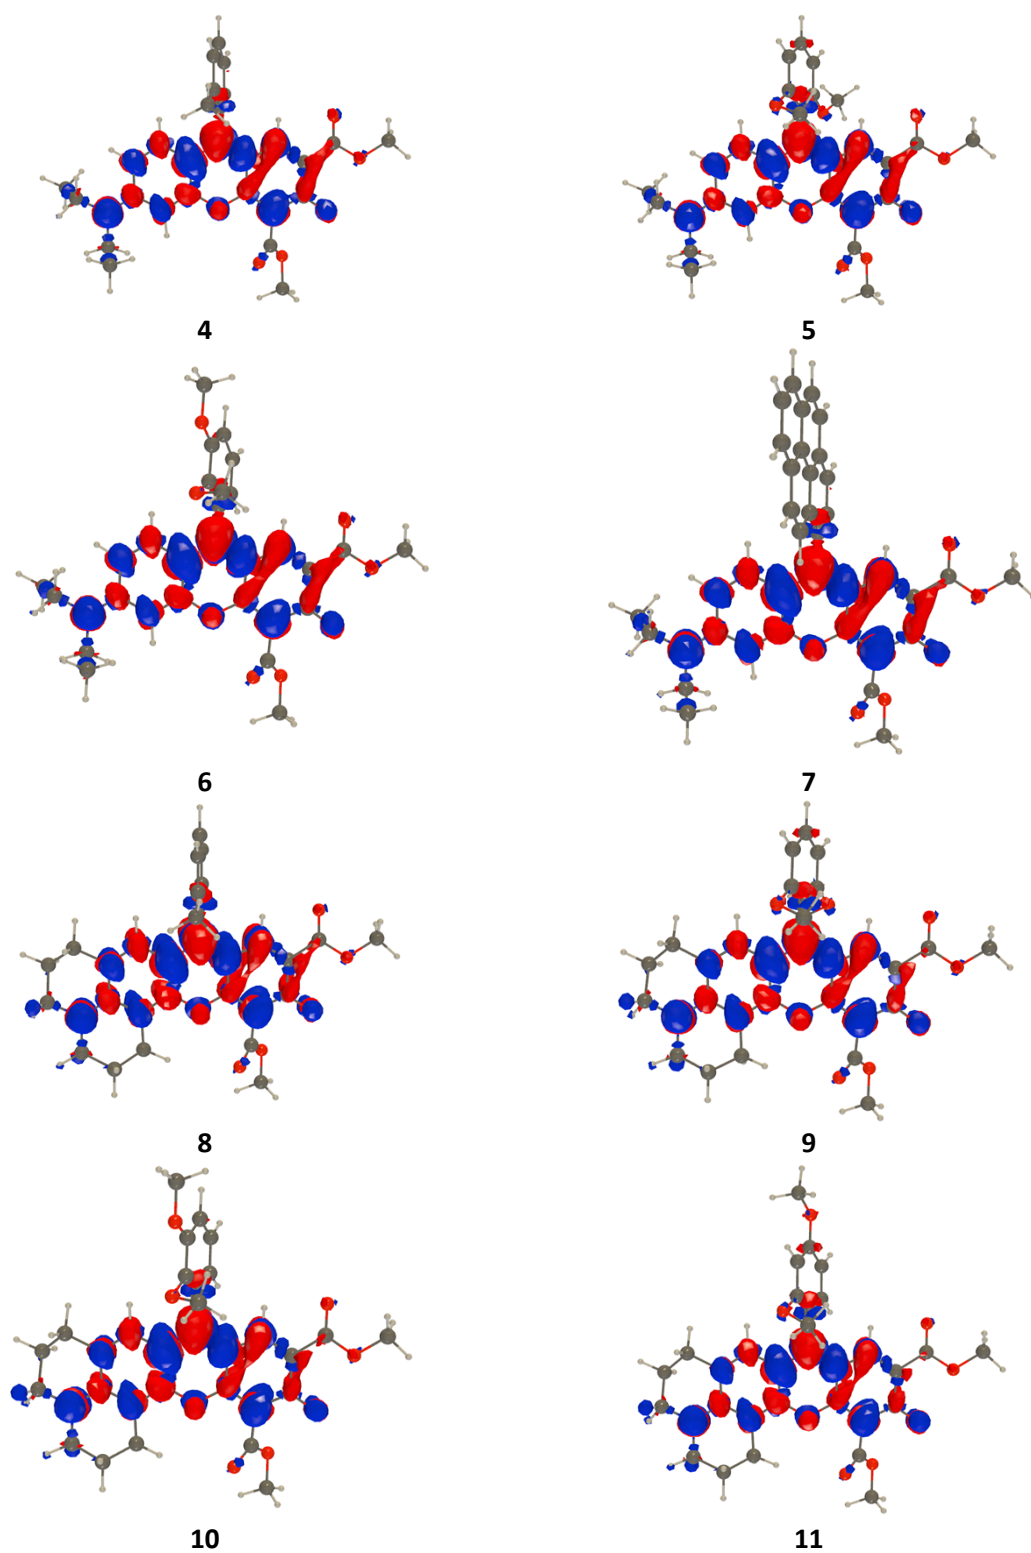

**Figure S13.** Electron density difference (EDD) plots for the lowest excited states of compounds **4-11**, as obtained with TD-DFT. The blue and red lobes correspond to regions of decrease and increase of electron density respectively. Contour threshold: 0.001 au.

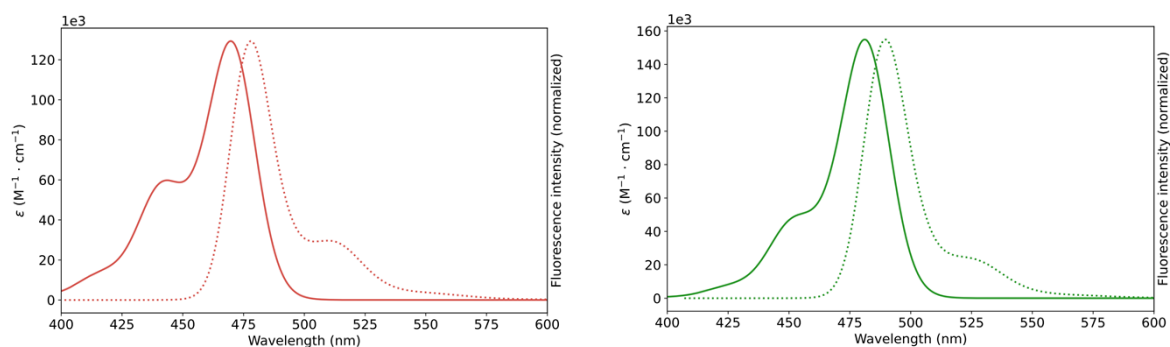

**Figure S14.** Computed vibrationaly-resolved absorption and emission spectra for **4** (left) and **8** (right). The presence of the typical “cyanine shoulder” is clear in all cases.

**Table S22.** Computed vertical absorption, vertical emission, and 0-0 wavelengths with TD-DFT and ADC(2) for rhodols **4-11**. All values are given in nm. We recall here that vertical transition energies cannot be directly compared to experimental  $\lambda_{\text{max}}$  and that, in contrast, 0-0 values can be rigorously to the experimental crossing point between the absorption and fluorescence curves. It can be noted that the experimental values are bracketed by the TD-DFT and ADC(2) estimates, but closer from the latter.

|           | cLR <sup>2</sup> -PCM-TD-DFT |                              |                 | COSMO-ADC(2)                 |                              |                 |
|-----------|------------------------------|------------------------------|-----------------|------------------------------|------------------------------|-----------------|
|           | $\lambda_{\text{vert-abso}}$ | $\lambda_{\text{vert-fluo}}$ | $\lambda_{0-0}$ | $\lambda_{\text{vert-abso}}$ | $\lambda_{\text{vert-fluo}}$ | $\lambda_{0-0}$ |
| <b>4</b>  | 440                          | 471                          | 466             | 562                          | 625                          | 603             |
| <b>5</b>  | 452                          | 491                          | 479             | 585                          | 665                          | 640             |
| <b>6</b>  | 445                          | 480                          | 472             | 573                          | 643                          | 620             |
| <b>7</b>  | 443                          | 478                          | 472             | 570                          | 640                          | 617             |
| <b>8</b>  | 452                          | 478                          | 477             | 592                          | 641                          | 622             |
| <b>9</b>  | 467                          | 496                          | 492             | 621                          | 681                          | 663             |
| <b>10</b> | 456                          | 487                          | 482             | 601                          | 660                          | 642             |
| <b>11</b> | 460                          | 486                          | 485             | 607                          | 659                          | 640             |

**Table S23.** Computed radiative and international conversion rates ( $10^8 \text{ s}^{-1}$ ) and deduced quantum yield of emission.

|           | $k_r$ | $k_{ic}$ | $\phi_f$ |
|-----------|-------|----------|----------|
| <b>8</b>  | 3.44  | 1.48     | 0.70     |
| <b>9</b>  | 2.97  | 1.65     | 0.64     |
| <b>10</b> | 3.23  | 1.56     | 0.67     |
| <b>11</b> | 3.22  | 1.54     | 0.68     |

## Notes and references

- 1 L. Yuan, W. Lin, J. Song and Y. Yang, *Chem. Commun.*, 2011, **47**, 12691–12693.
- 2 G. Yin, T. Niu, T. Yu, Y. Gan, X. Sun, P. Yin, H. Chen, Y. Zhang, H. Li and S. Yao, *Angew. Chem. Int. Ed.*, 2019, **58**, 4557–4561.
- 3 M. Tasior, Y. M. Poronik, O. Vakuliuk, B. Sadowski, M. Karczewski and D. T. Gryko, *J. Org. Chem.*, 2014, **79**, 8723–8732.
- 4 L. J. Farrugia, *J. Appl. Crystallogr.*, 2012, **45**, 849–854.
- 5 Y. M. Poronik, G. Clermont, M. Blanchard-Desce and D. T. Gryko, *J. Org. Chem.*, 2013, **78**, 11721–11732.
- 6 M. J. Frisch, G. W. Trucks, H. B. Schlegel, G. E. Scuseria, M. A. Robb, J. R. Cheeseman, G. Scalmani, V. Barone, G. A. Petersson, H. Nakatsuji, X. Li, M. Caricato, A. V. Marenich, J. Bloino, B. G. Janesko, R. Gomperts, B. Mennucci, H. P. Hratchian, J. V. Ortiz, A. F. Izmaylov, J. L. Sonnenberg, D. Williams-Young, F. Ding, F. Lipparini, F. Egidi, J. Goings, B. Peng, A. Petrone, T. Henderson, D. Ranasinghe, V. G. Zakrzewski, J. Gao, N. Rega, G. Zheng, W. Liang, M. Hada, M. Ehara, K. Toyota, R. Fukuda, J. Hasegawa, M. Ishida, T. Nakajima, Y. Honda, O. Kitao, H. Nakai, T. Vreven, K. Throssell, J. A. Montgomery Jr., J. E. Peralta, F. Ogliaro, M. J. Bearpark, J. J. Heyd, E. N. Brothers, K. N. Kudin, V. N. Staroverov, T. A. Keith, R. Kobayashi, J. Normand, K. Raghavachari, A. P. Rendell, J. C. Burant, S. S. Iyengar, J. Tomasi, M. Cossi, J. M. Millam, M. Klene, C. Adamo, R. Cammi, J. W. Ochterski, R. L. Martin, K. Morokuma, O. Farkas, J. B. Foresman and D. J. Fox, *Gaussian 16 Revision A.03*, Gaussian, Inc., Wallingford CT, 2016.
- 7 Y. Zhao and D. G. Truhlar, *Theor. Chem. Acc.*, 2008, **120**, 215–241.
- 8 J. Tomasi, B. Mennucci and R. Cammi, *Chem. Rev.*, 2005, **105**, 2999–3093.
- 9 C. A. Guido, A. Chrayteh, G. Scalmani, B. Mennucci and D. Jacquemin, *J. Chem. Theory Comput.*, 2021, **17**, 5155–5164.
- 10 B. Le Guennic and D. Jacquemin, *Acc. Chem. Res.*, 2015, **48**, 530–537.
- 11 A. Dreuw and M. Wormit, *Wiley Interdiscip. Rev. Comput. Mol. Sci.*, 2015, **5**, 82–95.
- 12 *TURBOMOLE V7.3*, A development of University of Karlsruhe and Forschungszentrum Karlsruhe GmbH, 1989–2007, TURBOMOLE GmbH. <http://www.turbomole.com>, 2007.
- 13 J. Cerezo and F. Santoro, *FCClasses 3.0*, <http://www.pi.iccom.cnr.it/fcclasses>.
- 14 F. Santoro, R. Improta, A. Lami, J. Bloino and V. Barone, *J. Chem. Phys.*, 2007, **126**, 084509.
- 15 F. Santoro and D. Jacquemin, *Wiley Interdiscip. Rev. Comput. Mol. Sci.*, 2016, **6**, 460–486.
- 16 Q. Peng, Y. Yi, Z. Shuai and J. Shao, *J. Chem. Phys.*, 2007, **126**, 114302.
- 17 A. Humeniuk, M. Bužančić, J. Hoče, J. Cerezo, R. Mitrić, F. Santoro and V. Bonačić-Koutecký, *J. Chem. Phys.*, 2020, **152**, 054107.
- 18 Q. Ou, Q. Peng and Z. Shuai, *J. Phys. Chem. Lett.*, 2020, **11**, 7790–7797.
